# Supplementary material for: Efficient estimation for large-scale linkage disequilibrium patterns of the human genome
Source: bioRxiv preprint, doi:10.1101/2023.06.18.545475, version 3 (2023-09-28)
Supplement: ExtendData1 [file 545475_file02.xlsx]

## Sheet: 1KG
unscale:	chr1	chr2	chr3	chr4	chr5	chr6	chr7	chr8	chr9	chr10	chr11	chr12	chr13	chr14	chr15	chr16	chr17	chr18	chr19	chr20	chr21	chr22
chr1	0.00607223	0.00604922	0.00582725	0.00572022	0.0057308	0.00534368	0.00554955	0.00599298	0.0056218	0.00567628	0.00555057	0.00562853	0.0057064	0.00576589	0.00583799	0.0056595	0.005971	0.00565878	0.00562196	0.00596368	0.0053566	0.00573886
chr2	0.00604922	0.00676766	0.0061699	0.00604633	0.00605328	0.00566752	0.00587742	0.0063373	0.00595539	0.00599875	0.00586425	0.00595554	0.00604789	0.00610011	0.00617418	0.00597297	0.0063178	0.0059836	0.00595083	0.00630868	0.00567479	0.00608529
chr3	0.00582725	0.0061699	0.00642101	0.00584532	0.00585375	0.00546149	0.00566366	0.0061159	0.00573622	0.00578148	0.00567233	0.00573991	0.00583144	0.005878	0.00594005	0.00576914	0.0060997	0.00580519	0.0057475	0.00609934	0.00547746	0.00585418
chr4	0.00572022	0.00604633	0.00584532	0.00625501	0.00574583	0.00535992	0.00555997	0.00603437	0.00563434	0.00568886	0.00558959	0.00565338	0.00572058	0.00580558	0.00584112	0.00567336	0.00597057	0.00571446	0.00565877	0.00600288	0.00539505	0.00576196
chr5	0.0057308	0.00605328	0.00585375	0.00574583	0.00632093	0.00536663	0.00557219	0.00600913	0.00564032	0.00568874	0.00557361	0.00564652	0.00573681	0.00579363	0.00586286	0.00567532	0.00599654	0.00568912	0.00565279	0.00600217	0.00537861	0.00576875
chr6	0.00534368	0.00566752	0.00546149	0.00535992	0.00536663	0.00573084	0.00520305	0.00563277	0.00526287	0.00531459	0.00522158	0.00526903	0.0053546	0.00540154	0.00546877	0.005309	0.00560315	0.00532104	0.00526454	0.00558987	0.00502499	0.00539377
chr7	0.00554955	0.00587742	0.00566366	0.00555997	0.00557219	0.00520305	0.00593318	0.00582268	0.00547769	0.00551621	0.00540527	0.0054831	0.00554335	0.00561822	0.00568075	0.00549443	0.0058035	0.00551725	0.00547345	0.00581061	0.00520845	0.00559376
chr8	0.00599298	0.0063373	0.0061159	0.00603437	0.00600913	0.00563277	0.00582268	0.00692017	0.00588841	0.00594531	0.00584583	0.00589323	0.00599443	0.00606035	0.00611845	0.00595243	0.00626611	0.0059667	0.00591053	0.00628663	0.00564303	0.00603405
chr9	0.0056218	0.00595539	0.00573622	0.00563434	0.00564032	0.00526287	0.00547769	0.00588841	0.00614437	0.00559407	0.00546286	0.00557642	0.00562963	0.00571035	0.00577406	0.00558258	0.00587308	0.00559086	0.00556054	0.0058549	0.00527703	0.00567026
chr10	0.00567628	0.00599875	0.00578148	0.00568886	0.00568874	0.00531459	0.00551621	0.00594531	0.00559407	0.00631265	0.00551872	0.00559461	0.00566929	0.00573614	0.00580535	0.00561835	0.00592349	0.0056309	0.00559198	0.00591153	0.00532887	0.00571513
chr11	0.00555057	0.00586425	0.00567233	0.00558959	0.00557361	0.00522158	0.00540527	0.00584583	0.00546286	0.00551872	0.00651993	0.00548469	0.00556407	0.0056199	0.00567601	0.00551125	0.00582452	0.00554214	0.00547859	0.00582422	0.00522899	0.00560641
chr12	0.00562853	0.00595554	0.00573991	0.00565338	0.00564652	0.00526903	0.0054831	0.00589323	0.00557642	0.00559461	0.00548469	0.00616528	0.00562545	0.00572045	0.00578127	0.00557387	0.00588195	0.00560481	0.00555784	0.00587579	0.00528204	0.00567812
chr13	0.0057064	0.00604789	0.00583144	0.00572058	0.00573681	0.0053546	0.00554335	0.00599443	0.00562963	0.00566929	0.00556407	0.00562545	0.00648616	0.00576783	0.00582405	0.00565136	0.00597557	0.0056535	0.00563086	0.00597169	0.00537257	0.00575067
chr14	0.00576589	0.00610011	0.005878	0.00580558	0.00579363	0.00540154	0.00561822	0.00606035	0.00571035	0.00573614	0.0056199	0.00572045	0.00576783	0.0067326	0.005943	0.00572849	0.00601226	0.0057528	0.00572023	0.00601594	0.00542767	0.00582151
chr15	0.00583799	0.00617418	0.00594005	0.00584112	0.00586286	0.00546877	0.00568075	0.00611845	0.00577406	0.00580535	0.00567601	0.00578127	0.00582405	0.005943	0.00683056	0.00579352	0.00608498	0.0058013	0.00577801	0.00608252	0.00546727	0.00588771
chr16	0.0056595	0.00597297	0.00576914	0.00567336	0.00567532	0.005309	0.00549443	0.00595243	0.00558258	0.00561835	0.00551125	0.00557387	0.00565136	0.00572849	0.00579352	0.00631648	0.0059067	0.00561926	0.00558069	0.00589347	0.0053248	0.00568742
chr17	0.005971	0.0063178	0.0060997	0.00597057	0.00599654	0.00560315	0.0058035	0.00626611	0.00587308	0.00592349	0.00582452	0.00588195	0.00597557	0.00601226	0.00608498	0.0059067	0.0071774	0.00594365	0.0058761	0.00625463	0.0056078	0.00601336
chr18	0.00565878	0.0059836	0.00580519	0.00571446	0.00568912	0.00532104	0.00551725	0.0059667	0.00559086	0.0056309	0.00554214	0.00560481	0.0056535	0.0057528	0.0058013	0.00561926	0.00594365	0.00648346	0.00560777	0.00595434	0.00533935	0.00570707
chr19	0.00562196	0.00595083	0.0057475	0.00565877	0.00565279	0.00526454	0.00547345	0.00591053	0.00556054	0.00559198	0.00547859	0.00555784	0.00563086	0.00572023	0.00577801	0.00558069	0.0058761	0.00560777	0.0065748	0.0058836	0.00530564	0.0056769
chr20	0.00596368	0.00630868	0.00609934	0.00600288	0.00600217	0.00558987	0.00581061	0.00628663	0.0058549	0.00591153	0.00582422	0.00587579	0.00597169	0.00601594	0.00608252	0.00589347	0.00625463	0.00595434	0.0058836	0.0073904	0.0056183	0.00600603
chr21	0.0053566	0.00567479	0.00547746	0.00539505	0.00537861	0.00502499	0.00520845	0.00564303	0.00527703	0.00532887	0.00522899	0.00528204	0.00537257	0.00542767	0.00546727	0.0053248	0.0056078	0.00533935	0.00530564	0.0056183	0.00647596	0.00538867
chr22	0.00573886	0.00608529	0.00585418	0.00576196	0.00576875	0.00539377	0.00559376	0.00603405	0.00567026	0.00571513	0.00560641	0.00567812	0.00575067	0.00582151	0.00588771	0.00568742	0.00601336	0.00570707	0.0056769	0.00600603	0.00538867	0.00715392
scale:	chr1	chr2	chr3	chr4	chr5	chr6	chr7	chr8	chr9	chr10	chr11	chr12	chr13	chr14	chr15	chr16	chr17	chr18	chr19	chr20	chr21	chr22
chr1	1	0.944269	0.933906	0.928832	0.925729	0.906562	0.925342	0.925248	0.92128	0.917626	0.882912	0.920773	0.910217	0.902791	0.907588	0.914946	0.905576	0.902994	0.891006	0.89143	0.855975	0.872539
chr2	0.944269	1	0.936585	0.929921	0.926168	0.910709	0.928242	0.926722	0.924391	0.918529	0.883532	0.922802	0.913726	0.904667	0.909147	0.914614	0.907556	0.904388	0.893306	0.893184	0.858917	0.876334
chr3	0.933906	0.936585	1	0.92301	0.919553	0.901035	0.918365	0.918225	0.914145	0.908897	0.877434	0.913136	0.904548	0.895002	0.898025	0.906989	0.899622	0.900849	0.88582	0.886603	0.851186	0.865562
chr4	0.928832	0.929921	0.92301	1	0.914492	0.895929	0.913429	0.917921	0.909739	0.90612	0.876028	0.911221	0.899045	0.895622	0.894705	0.903682	0.892179	0.898452	0.883636	0.884077	0.849425	0.863152
chr5	0.925729	0.926168	0.919553	0.914492	1	0.892405	0.910695	0.909347	0.905989	0.901406	0.868999	0.905401	0.896925	0.889149	0.893383	0.899311	0.891419	0.889836	0.878129	0.879395	0.842451	0.859693
chr6	0.906562	0.910709	0.901035	0.895929	0.892405	1	0.893086	0.895218	0.887829	0.884428	0.855013	0.887317	0.879226	0.870622	0.875196	0.883528	0.874784	0.874076	0.858904	0.860133	0.826604	0.844194
chr7	0.925342	0.928242	0.918365	0.913429	0.910695	0.893086	1	0.90953	0.908221	0.902237	0.869913	0.907532	0.894609	0.890017	0.893531	0.898706	0.890525	0.890764	0.877673	0.878766	0.842089	0.86048
chr8	0.925248	0.926722	0.918225	0.917921	0.909347	0.895218	0.90953	1	0.903989	0.90038	0.871115	0.903151	0.895736	0.888931	0.891079	0.90149	0.890277	0.891961	0.877544	0.880319	0.844761	0.859443
chr9	0.92128	0.924391	0.914145	0.909739	0.905989	0.887829	0.908221	0.903989	1	0.899248	0.864071	0.907116	0.892919	0.889065	0.892598	0.897433	0.885713	0.887137	0.876315	0.870246	0.838514	0.857257
chr10	0.917626	0.918529	0.908897	0.90612	0.901406	0.884428	0.902237	0.90038	0.899248	1	0.861101	0.897766	0.887048	0.881002	0.885298	0.890968	0.881234	0.881405	0.869349	0.866779	0.8353	0.852355
chr11	0.882912	0.883532	0.877434	0.876028	0.868999	0.855013	0.869913	0.871115	0.864071	0.861101	1	0.866011	0.856621	0.849303	0.851691	0.859965	0.852612	0.853597	0.838061	0.840281	0.806497	0.822729
chr12	0.920773	0.922802	0.913136	0.911221	0.905401	0.887317	0.907532	0.903151	0.907116	0.897766	0.866011	1	0.8907	0.889084	0.892153	0.894468	0.885503	0.887798	0.87436	0.871827	0.837847	0.856948
chr13	0.910217	0.913726	0.904548	0.899045	0.896925	0.879226	0.894609	0.895736	0.892919	0.887048	0.856621	0.8907	1	0.874077	0.876329	0.884273	0.87715	0.873164	0.863743	0.863946	0.830942	0.84624
chr14	0.902791	0.904667	0.895002	0.895622	0.889149	0.870622	0.890017	0.888931	0.889065	0.881002	0.849303	0.889084	0.874077	1	0.87778	0.879858	0.866304	0.87216	0.861314	0.85434	0.824024	0.840909
chr15	0.907588	0.909147	0.898025	0.894705	0.893383	0.875196	0.893531	0.891079	0.892598	0.885298	0.851691	0.892153	0.876329	0.87778	1	0.883525	0.870555	0.873265	0.863834	0.85766	0.82414	0.844431
chr16	0.914946	0.914614	0.906989	0.903682	0.899311	0.883528	0.898706	0.90149	0.897433	0.890968	0.859965	0.894468	0.884273	0.879858	0.883525	1	0.878767	0.879614	0.867624	0.864162	0.834691	0.848252
chr17	0.905576	0.907556	0.899622	0.892179	0.891419	0.874784	0.890525	0.890277	0.885713	0.881234	0.852612	0.885503	0.87715	0.866304	0.870555	0.878767	1	0.872824	0.857026	0.860371	0.824661	0.841371
chr18	0.902994	0.904388	0.900849	0.898452	0.889836	0.874076	0.890764	0.891961	0.887137	0.881405	0.853597	0.887798	0.873164	0.87216	0.873265	0.879614	0.872824	1	0.860556	0.861791	0.826145	0.840171
chr19	0.891006	0.893306	0.88582	0.883636	0.878129	0.858904	0.877673	0.877544	0.876315	0.869349	0.838061	0.87436	0.863743	0.861314	0.863834	0.867624	0.857026	0.860556	1	0.845752	0.815335	0.830036
chr20	0.89143	0.893184	0.886603	0.884077	0.879395	0.860133	0.878766	0.880319	0.870246	0.866779	0.840281	0.871827	0.863946	0.85434	0.85766	0.864162	0.860371	0.861791	0.845752	1	0.814297	0.828233
chr21	0.855975	0.858917	0.851186	0.849425	0.842451	0.826604	0.842089	0.844761	0.838514	0.8353	0.806497	0.837847	0.830942	0.824024	0.82414	0.834691	0.824661	0.826145	0.815335	0.814297	1	0.794411
chr22	0.872539	0.876334	0.865562	0.863152	0.859693	0.844194	0.86048	0.859443	0.857257	0.852355	0.822729	0.856948	0.84624	0.840909	0.844431	0.848252	0.841371	0.840171	0.830036	0.828233	0.794411	1
raw result:
Tagi	SNPi	Tagj	SNPj	rsq	sd	pval	rsq_s	sd_s	pval_s
10	152251	10	152251	0.00631265	5.04495e-06	1.22377e-12	1	0	0
11	151750	10	152251	0.00551872	4.78222e-06	1.69154e-12	0.861101	0.000147094	2.55438e-15
11	151750	11	151750	0.00651993	5.21061e-06	1.22377e-12	1	0	0
12	139684	10	152251	0.00559461	4.7354e-06	1.5398e-12	0.897766	0.000110762	6.95083e-16
12	139684	11	151750	0.00548469	4.73742e-06	1.66986e-12	0.866011	0.000142366	2.19108e-15
12	139684	12	139684	0.00616528	4.92717e-06	1.22377e-12	1	0	0
13	113390	10	152251	0.00566929	4.8311e-06	1.58193e-12	0.887048	0.000121661	1.06154e-15
13	113390	11	151750	0.00556407	4.83646e-06	1.71262e-12	0.856621	0.000151594	2.94233e-15
13	113390	12	139684	0.00562545	4.7829e-06	1.56767e-12	0.8907	0.000118058	9.25916e-16
13	113390	13	113390	0.00648616	5.18362e-06	1.22377e-12	1	0	0
14	97335	10	152251	0.00573614	4.90712e-06	1.60674e-12	0.881002	0.000127778	1.32753e-15
14	97335	11	151750	0.0056199	4.90957e-06	1.74735e-12	0.849303	0.000158721	3.65933e-15
14	97335	12	139684	0.00572045	4.86883e-06	1.57434e-12	0.889084	0.000119765	9.87791e-16
14	97335	13	113390	0.00576783	4.95674e-06	1.63627e-12	0.874077	0.000134795	1.69677e-15
14	97335	14	97335	0.0067326	5.38057e-06	1.22378e-12	1	0	0
15	85307	10	152251	0.00580535	4.95302e-06	1.58959e-12	0.885298	0.00012359	1.13946e-15
15	85307	11	151750	0.00567601	4.95079e-06	1.73637e-12	0.851691	0.00015652	3.42194e-15
15	85307	12	139684	0.00578127	4.91139e-06	1.5626e-12	0.892153	0.000116775	8.80557e-16
15	85307	13	113390	0.00582405	4.99803e-06	1.6271e-12	0.876329	0.000132666	1.57578e-15
15	85307	14	97335	0.005943	5.09558e-06	1.62132e-12	0.87778	0.000131312	1.50243e-15
15	85307	15	85307	0.00683056	5.45886e-06	1.22378e-12	1	0	0
16	92002	10	152251	0.00561835	4.77638e-06	1.56703e-12	0.890968	0.000117909	9.20169e-16
16	92002	11	151750	0.00551125	4.7803e-06	1.69801e-12	0.859965	0.000148531	2.66971e-15
16	92002	12	139684	0.00557387	4.72838e-06	1.55361e-12	0.894468	0.000114444	8.03947e-16
16	92002	13	113390	0.00565136	4.8252e-06	1.5943e-12	0.884273	0.000124777	1.18935e-15
16	92002	14	97335	0.00572849	4.9051e-06	1.61269e-12	0.879858	0.000129255	1.39719e-15
16	92002	15	85307	0.00579352	4.94944e-06	1.59798e-12	0.883525	0.000125701	1.22913e-15
16	92002	16	92002	0.00631648	5.04801e-06	1.22377e-12	1	0	0
17	79458	10	152251	0.00592349	5.06696e-06	1.6062e-12	0.881234	0.00012766	1.32122e-15
17	79458	11	151750	0.00582452	5.07719e-06	1.73211e-12	0.852612	0.000155653	3.33229e-15
17	79458	12	139684	0.00588195	5.01794e-06	1.58904e-12	0.885503	0.000123464	1.13378e-15
17	79458	13	113390	0.00597557	5.1254e-06	1.62373e-12	0.87715	0.000131872	1.53262e-15
17	79458	14	97335	0.00601226	5.19375e-06	1.67068e-12	0.866304	0.000142623	2.20392e-15
17	79458	15	85307	0.00608498	5.24219e-06	1.65247e-12	0.870555	0.000138551	1.92477e-15
17	79458	16	92002	0.0059067	5.06157e-06	1.61763e-12	0.878767	0.00013045	1.4568e-15
17	79458	17	79458	0.0071774	5.73606e-06	1.22378e-12	1	0	0
18	87105	10	152251	0.0056309	4.81617e-06	1.60552e-12	0.881405	0.0001275	1.31358e-15
18	87105	11	151750	0.00554214	4.82783e-06	1.7275e-12	0.853597	0.000154713	3.23758e-15
18	87105	12	139684	0.00560481	4.7746e-06	1.57987e-12	0.887798	0.000121178	1.04125e-15
18	87105	13	113390	0.0056535	4.86171e-06	1.64061e-12	0.873164	0.000135818	1.75615e-15
18	87105	14	97335	0.0057528	4.95057e-06	1.64522e-12	0.87216	0.000136889	1.82056e-15
18	87105	15	85307	0.0058013	4.98898e-06	1.64084e-12	0.873265	0.000135894	1.75931e-15
18	87105	16	92002	0.00561926	4.81265e-06	1.61414e-12	0.879614	0.000129618	1.41455e-15
18	87105	17	79458	0.00594365	5.11293e-06	1.6428e-12	0.872824	0.000136347	1.78645e-15
18	87105	18	87105	0.00648346	5.18146e-06	1.22377e-12	1	0	0
19	72794	10	152251	0.00559198	4.8208e-06	1.65705e-12	0.869349	0.000139568	1.99292e-15
19	72794	11	151750	0.00547859	4.82436e-06	1.80387e-12	0.838061	0.000169698	5.04343e-15
19	72794	12	139684	0.00555784	4.77589e-06	1.63574e-12	0.87436	0.000134699	1.68972e-15
19	72794	13	113390	0.00563086	4.87276e-06	1.68237e-12	0.863743	0.000145208	2.39631e-15
19	72794	14	97335	0.00572023	4.95835e-06	1.69361e-12	0.861314	0.000147652	2.59083e-15
19	72794	15	85307	0.00577801	5.00031e-06	1.68265e-12	0.863834	0.000145293	2.40094e-15
19	72794	16	92002	0.00558069	4.81746e-06	1.66587e-12	0.867624	0.000141594	2.12803e-15
19	72794	17	79458	0.0058761	5.10846e-06	1.71365e-12	0.857026	0.000151919	2.96207e-15
19	72794	18	87105	0.00560777	4.86367e-06	1.69752e-12	0.860556	0.000148509	2.66079e-15
19	72794	19	72794	0.0065748	5.25445e-06	1.22377e-12	1	0	0
1	225967	10	152251	0.00567628	4.74662e-06	1.4669e-12	0.917626	9.01857e-05	2.79904e-16
1	225967	11	151750	0.00555057	4.74148e-06	1.59744e-12	0.882912	0.000125463	1.22325e-15
1	225967	12	139684	0.00562853	4.69811e-06	1.45623e-12	0.920773	8.69823e-05	2.3891e-16
1	225967	13	113390	0.0057064	4.79336e-06	1.49359e-12	0.910217	9.79962e-05	4.03068e-16
1	225967	14	97335	0.00576589	4.8654e-06	1.521e-12	0.902791	0.000105682	5.63355e-16
1	225967	15	85307	0.00583799	4.91216e-06	1.50368e-12	0.907588	0.000100877	4.57853e-16
1	225967	16	92002	0.0056595	4.741e-06	1.47736e-12	0.914946	9.33107e-05	3.24538e-16
1	225967	17	79458	0.005971	5.03026e-06	1.5111e-12	0.905576	0.000102955	5.01197e-16
1	225967	18	87105	0.00565878	4.77475e-06	1.52065e-12	0.902994	0.0001056	5.61089e-16
1	225967	19	72794	0.00562196	4.7794e-06	1.56698e-12	0.891006	0.0001179	9.19717e-16
1	225967	1	225967	0.00607223	4.85281e-06	1.22376e-12	1	0	0
20	68877	10	152251	0.00591153	5.10473e-06	1.66806e-12	0.866779	0.000142023	2.16236e-15
20	68877	11	151750	0.00582422	5.12058e-06	1.79243e-12	0.840281	0.000167534	4.74064e-15
20	68877	12	139684	0.00587579	5.05727e-06	1.64633e-12	0.871827	0.000137131	1.83631e-15
20	68877	13	113390	0.00597169	5.16683e-06	1.68123e-12	0.863946	0.000144947	2.37693e-15
20	68877	14	97335	0.00601594	5.239e-06	1.72544e-12	0.85434	0.00015434	3.19531e-15
20	68877	15	85307	0.00608252	5.28541e-06	1.71042e-12	0.85766	0.000151226	2.8998e-15
20	68877	16	92002	0.00589347	5.09895e-06	1.68096e-12	0.864162	0.000144914	2.37239e-15
20	68877	17	79458	0.00625463	5.42515e-06	1.69809e-12	0.860371	0.000148617	2.67083e-15
20	68877	18	87105	0.00595434	5.15981e-06	1.69169e-12	0.861791	0.000147247	2.55679e-15
20	68877	19	72794	0.0058836	5.15478e-06	1.76762e-12	0.845752	0.000162849	4.12377e-15
20	68877	1	225967	0.00596368	5.0684e-06	1.56511e-12	0.89143	0.000117409	9.02787e-16
20	68877	20	68877	0.0073904	5.90629e-06	1.22379e-12	1	0	0
21	45064	10	152251	0.00532887	4.70354e-06	1.82086e-12	0.8353	0.000172958	5.51462e-15
21	45064	11	151750	0.00522899	4.7133e-06	1.98038e-12	0.806497	0.00019961	1.12575e-14
21	45064	12	139684	0.00528204	4.65401e-06	1.80809e-12	0.837847	0.000170613	5.15835e-15
21	45064	13	113390	0.00537257	4.75726e-06	1.84423e-12	0.830942	0.000177205	6.20502e-15
21	45064	14	97335	0.00542767	4.83023e-06	1.88165e-12	0.824024	0.000183738	7.41586e-15
21	45064	15	85307	0.00546727	4.86534e-06	1.88144e-12	0.82414	0.00018372	7.40863e-15
21	45064	16	92002	0.0053248	4.70291e-06	1.82546e-12	0.834691	0.000173857	5.64662e-15
21	45064	17	79458	0.0056078	4.98857e-06	1.87869e-12	0.824661	0.000183252	7.31506e-15
21	45064	18	87105	0.00533935	4.74471e-06	1.87069e-12	0.826145	0.000181881	7.04772e-15
21	45064	19	72794	0.00530564	4.75253e-06	1.93138e-12	0.815335	0.000192032	9.23156e-15
21	45064	1	225967	0.0053566	4.66055e-06	1.71913e-12	0.855975	0.00015309	3.06946e-15
21	45064	20	68877	0.0056183	5.03627e-06	1.93703e-12	0.814297	0.000192926	9.45262e-15
21	45064	21	45064	0.00647596	5.17546e-06	1.22377e-12	1	0	0
22	40378	10	152251	0.00571513	4.98521e-06	1.7368e-12	0.852355	0.000156744	3.4309e-15
22	40378	11	151750	0.00560641	4.99328e-06	1.88766e-12	0.822729	0.000184713	7.62222e-15
22	40378	12	139684	0.00567812	4.93771e-06	1.71555e-12	0.856948	0.000152376	2.99898e-15
22	40378	13	113390	0.00575067	5.03775e-06	1.76681e-12	0.84624	0.000162755	4.1047e-15
22	40378	14	97335	0.00582151	5.11895e-06	1.7935e-12	0.840909	0.000167906	4.76854e-15
22	40378	15	85307	0.00588771	5.16479e-06	1.77641e-12	0.844431	0.000164651	4.33631e-15
22	40378	16	92002	0.00568742	4.97596e-06	1.75778e-12	0.848252	0.000161007	3.89408e-15
22	40378	17	79458	0.00601336	5.2863e-06	1.79167e-12	0.841371	0.000167576	4.72082e-15
22	40378	18	87105	0.00570707	5.02127e-06	1.79772e-12	0.840171	0.000168722	4.87911e-15
22	40378	19	72794	0.0056769	5.03112e-06	1.85068e-12	0.830036	0.000178415	6.40414e-15
22	40378	1	225967	0.00573886	4.93861e-06	1.64526e-12	0.872539	0.000136959	1.82115e-15
22	40378	20	68877	0.00600603	5.32949e-06	1.86e-12	0.828233	0.00018004	6.69866e-15
22	40378	21	45064	0.00538867	4.90589e-06	2.06094e-12	0.794411	0.000211645	1.51136e-14
22	40378	22	40378	0.00715392	5.71729e-06	1.22378e-12	1	0	0
2	241241	10	152251	0.00599875	5.01344e-06	1.46359e-12	0.918529	8.91894e-05	2.66688e-16
2	241241	11	151750	0.00586425	5.0073e-06	1.59472e-12	0.883532	0.000124786	1.19371e-15
2	241241	12	139684	0.00595554	4.965e-06	1.44913e-12	0.922802	8.48088e-05	2.14018e-16
2	241241	13	113390	0.00604789	5.06939e-06	1.4809e-12	0.913726	9.43226e-05	3.40658e-16
2	241241	14	97335	0.00610011	5.14139e-06	1.51388e-12	0.904667	0.000103708	5.18107e-16
2	241241	15	85307	0.00617418	5.18998e-06	1.49785e-12	0.909147	9.92179e-05	4.25543e-16
2	241241	16	92002	0.00597297	5.00443e-06	1.47835e-12	0.914614	9.35934e-05	3.28966e-16
2	241241	17	79458	0.0063178	5.31587e-06	1.50368e-12	0.907556	0.000100868	4.57766e-16
2	241241	18	87105	0.0059836	5.04439e-06	1.51531e-12	0.904388	0.000104119	5.27008e-16
2	241241	19	72794	0.00595083	5.05156e-06	1.55781e-12	0.893306	0.000115525	8.39114e-16
2	241241	1	225967	0.00604922	4.98089e-06	1.37894e-12	0.944269	6.19485e-05	5.55727e-17
2	241241	20	68877	0.00630868	5.35557e-06	1.55807e-12	0.893184	0.000115583	8.41277e-16
2	241241	21	45064	0.00567479	4.92746e-06	1.70535e-12	0.858917	0.000150187	2.80444e-15
2	241241	22	40378	0.00608529	5.22368e-06	1.62892e-12	0.876334	0.000133157	1.5992e-15
2	241241	2	241241	0.00676766	5.40859e-06	1.22378e-12	1	0	0
3	212670	10	152251	0.00578148	4.85988e-06	1.49783e-12	0.908897	9.91899e-05	4.25531e-16
3	212670	11	151750	0.00567233	4.86253e-06	1.62003e-12	0.877434	0.000130909	1.48644e-15
3	212670	12	139684	0.00573991	4.81282e-06	1.48286e-12	0.913136	9.4891e-05	3.49847e-16
3	212670	13	113390	0.00583144	4.91523e-06	1.51423e-12	0.904548	0.000103806	5.20327e-16
3	212670	14	97335	0.005878	4.98387e-06	1.55048e-12	0.895002	0.000113588	7.78302e-16
3	212670	15	85307	0.00594005	5.02732e-06	1.53924e-12	0.898025	0.000110625	6.90836e-16
3	212670	16	92002	0.00576914	4.856e-06	1.50588e-12	0.906989	0.000101495	4.70426e-16
3	212670	17	79458	0.0060997	5.15743e-06	1.53326e-12	0.899622	0.000109023	6.47074e-16
3	212670	18	87105	0.00580519	4.90473e-06	1.52867e-12	0.900849	0.000107785	6.14823e-16
3	212670	19	72794	0.0057475	4.90213e-06	1.5876e-12	0.88582	0.000123101	1.1189e-15
3	212670	1	225967	0.00582725	4.8265e-06	1.41187e-12	0.933906	7.30041e-05	1.12021e-16
3	212670	20	68877	0.00609934	5.19947e-06	1.58424e-12	0.886603	0.000122254	1.08458e-15
3	212670	21	45064	0.00547746	4.78123e-06	1.74165e-12	0.851186	0.000157702	3.53485e-15
3	212670	22	40378	0.00585418	5.06099e-06	1.6757e-12	0.865562	0.000143799	2.28531e-15
3	212670	2	241241	0.0061699	5.10234e-06	1.40309e-12	0.936585	7.0112e-05	9.42113e-17
3	212670	3	212670	0.00642101	5.13155e-06	1.22377e-12	1	0	0
4	222241	10	152251	0.00568886	4.79004e-06	1.50791e-12	0.90612	0.00010203	4.82266e-16
4	222241	11	151750	0.00558959	4.79594e-06	1.62589e-12	0.876028	0.000132295	1.56036e-15
4	222241	12	139684	0.00565338	4.74569e-06	1.48965e-12	0.911221	9.68574e-05	3.82964e-16
4	222241	13	113390	0.00572058	4.83805e-06	1.53475e-12	0.899045	0.000109403	6.57836e-16
4	222241	14	97335	0.00580558	4.92055e-06	1.54807e-12	0.895622	0.000112955	7.5899e-16
4	222241	15	85307	0.00584112	4.95376e-06	1.55193e-12	0.894705	0.000113978	7.90108e-16
4	222241	16	92002	0.00567336	4.78497e-06	1.518e-12	0.903682	0.000104868	5.44037e-16
4	222241	17	79458	0.00597057	5.07157e-06	1.5618e-12	0.892179	0.000116544	8.73517e-16
4	222241	18	87105	0.00571446	4.83517e-06	1.53769e-12	0.898452	0.000110213	6.79325e-16
4	222241	19	72794	0.00565877	4.83312e-06	1.59641e-12	0.883636	0.000125276	1.212e-15
4	222241	1	225967	0.00572022	4.75168e-06	1.42843e-12	0.928832	7.83348e-05	1.51772e-16
4	222241	20	68877	0.00600288	5.12541e-06	1.5944e-12	0.884077	0.000124772	1.19023e-15
4	222241	21	45064	0.00539505	4.71495e-06	1.75002e-12	0.849425	0.000159384	3.71879e-15
4	222241	22	40378	0.00576196	4.98922e-06	1.68643e-12	0.863152	0.000146142	2.46533e-15
4	222241	2	241241	0.00604633	5.01927e-06	1.42467e-12	0.929921	7.71306e-05	1.41986e-16
4	222241	3	212670	0.00584532	4.87209e-06	1.44793e-12	0.92301	8.4425e-05	2.09981e-16
4	222241	4	222241	0.00625501	4.99888e-06	1.22377e-12	1	0	0
5	193632	10	152251	0.00568874	4.80384e-06	1.5255e-12	0.901406	0.00010689	5.93179e-16
5	193632	11	151750	0.00557361	4.8043e-06	1.65612e-12	0.868999	0.000139269	1.97906e-15
5	193632	12	139684	0.00564652	4.75675e-06	1.5109e-12	0.905401	0.000102876	5.00052e-16
5	193632	13	113390	0.00573681	4.85825e-06	1.54297e-12	0.896925	0.000111602	7.1908e-16
5	193632	14	97335	0.00579363	4.93045e-06	1.57348e-12	0.889149	0.000119525	9.79633e-16
5	193632	15	85307	0.00586286	4.97642e-06	1.55721e-12	0.893383	0.000115361	8.34089e-16
5	193632	16	92002	0.00567532	4.79958e-06	1.53452e-12	0.899311	0.000109366	6.5616e-16
5	193632	17	79458	0.00599654	5.09619e-06	1.56494e-12	0.891419	0.000117359	9.01272e-16
5	193632	18	87105	0.00568912	4.83975e-06	1.57119e-12	0.889836	0.000118959	9.58232e-16
5	193632	19	72794	0.00565279	4.84519e-06	1.61925e-12	0.878129	0.0001308	1.47677e-15
5	193632	1	225967	0.0057308	4.76917e-06	1.4389e-12	0.925729	8.16352e-05	1.81424e-16
5	193632	20	68877	0.00600217	5.1403e-06	1.61376e-12	0.879395	0.000129481	1.40995e-15
5	193632	21	45064	0.00537861	4.7234e-06	1.78425e-12	0.842451	0.000166086	4.53182e-15
5	193632	22	40378	0.00576875	5.00679e-06	1.70227e-12	0.859693	0.000149551	2.7473e-15
5	193632	2	241241	0.00605328	5.03611e-06	1.43726e-12	0.926168	8.11155e-05	1.76513e-16
5	193632	3	212670	0.00585375	4.88916e-06	1.45989e-12	0.919553	8.80722e-05	2.52447e-16
5	193632	4	222241	0.00574583	4.81343e-06	1.47749e-12	0.914492	9.33073e-05	3.25135e-16
5	193632	5	193632	0.00632093	5.05156e-06	1.22377e-12	1	0	0
6	206165	10	152251	0.00531459	4.5357e-06	1.59154e-12	0.884428	0.000124024	1.16011e-15
6	206165	11	151750	0.00522158	4.54302e-06	1.71905e-12	0.855013	0.000152898	3.06789e-15
6	206165	12	139684	0.00526903	4.48875e-06	1.58015e-12	0.887317	0.000121195	1.04411e-15
6	206165	13	113390	0.0053546	4.58546e-06	1.61341e-12	0.879226	0.000129364	1.40594e-15
6	206165	14	97335	0.00540154	4.65175e-06	1.65011e-12	0.870622	0.000137944	1.89068e-15
6	206165	15	85307	0.00546877	4.69589e-06	1.63092e-12	0.875196	0.000133531	1.62565e-15
6	206165	16	92002	0.005309	4.53438e-06	1.5964e-12	0.883528	0.000125263	1.21209e-15
6	206165	17	79458	0.00560315	4.81262e-06	1.63274e-12	0.874784	0.000133957	1.64959e-15
6	206165	18	87105	0.00532104	4.57243e-06	1.63577e-12	0.874076	0.000134664	1.69019e-15
6	206165	19	72794	0.00526454	4.56982e-06	1.70323e-12	0.858904	0.00014966	2.76548e-15
6	206165	1	225967	0.00534368	4.49796e-06	1.50598e-12	0.906562	0.000101483	4.71092e-16
6	206165	20	68877	0.00558987	4.84806e-06	1.6974e-12	0.860133	0.000148405	2.65862e-15
6	206165	21	45064	0.00502499	4.46265e-06	1.86616e-12	0.826604	0.000181016	6.89919e-15
6	206165	22	40378	0.00539377	4.73107e-06	1.77577e-12	0.844194	0.000164458	4.32093e-15
6	206165	2	241241	0.00566752	4.75848e-06	1.4908e-12	0.910709	9.71666e-05	3.88749e-16
6	206165	3	212670	0.00546149	4.61264e-06	1.52642e-12	0.901035	0.000107127	5.99438e-16
6	206165	4	222241	0.00535992	4.54111e-06	1.54572e-12	0.895929	0.000112301	7.40557e-16
6	206165	5	193632	0.00536663	4.55689e-06	1.5595e-12	0.892405	0.000115909	8.53782e-16
6	206165	6	206165	0.00573084	4.57996e-06	1.22376e-12	1	0	0
7	177400	10	152251	0.00551621	4.65595e-06	1.52262e-12	0.902237	0.000106112	5.7397e-16
7	177400	11	151750	0.00540527	4.65658e-06	1.6524e-12	0.869913	0.000138438	1.92416e-15
7	177400	12	139684	0.0054831	4.61328e-06	1.50333e-12	0.907532	0.000100764	4.5592e-16
7	177400	13	113390	0.00554335	4.70133e-06	1.55208e-12	0.894609	0.000114012	7.91384e-16
7	177400	14	97335	0.00561822	4.77874e-06	1.57028e-12	0.890017	0.000118722	9.49832e-16
7	177400	15	85307	0.00568075	4.82158e-06	1.55686e-12	0.893531	0.00011528	8.31179e-16
7	177400	16	92002	0.00549443	4.6485e-06	1.53702e-12	0.898706	0.000110048	6.74485e-16
7	177400	17	79458	0.0058035	4.93507e-06	1.56868e-12	0.890525	0.000118325	9.35063e-16
7	177400	18	87105	0.00551725	4.69097e-06	1.56776e-12	0.890764	0.000118094	9.26798e-16
7	177400	19	72794	0.00547345	4.69303e-06	1.62139e-12	0.877673	0.000131318	1.50346e-15
7	177400	1	225967	0.00554955	4.61954e-06	1.4404e-12	0.925342	8.21091e-05	1.85985e-16
7	177400	20	68877	0.00581061	4.97845e-06	1.61661e-12	0.878766	0.000130172	1.44442e-15
7	177400	21	45064	0.00520845	4.57529e-06	1.78632e-12	0.842089	0.000166494	4.58436e-15
7	177400	22	40378	0.00559376	4.85253e-06	1.69893e-12	0.86048	0.000148852	2.68647e-15
7	177400	2	241241	0.00587742	4.88409e-06	1.43056e-12	0.928242	7.9013e-05	1.57497e-16
7	177400	3	212670	0.00566366	4.73388e-06	1.4642e-12	0.918365	8.93746e-05	2.69101e-16
7	177400	4	222241	0.00555997	4.66084e-06	1.48145e-12	0.913429	9.44737e-05	3.43294e-16
7	177400	5	193632	0.00557219	4.67887e-06	1.49135e-12	0.910695	9.73398e-05	3.91553e-16
7	177400	6	206165	0.00520305	4.41627e-06	1.55708e-12	0.893086	0.00011529	8.3314e-16
7	177400	7	177400	0.00593318	4.74167e-06	1.22376e-12	1	0	0
8	163436	10	152251	0.00594531	5.02377e-06	1.52946e-12	0.90038	0.000107968	6.20284e-16
8	163436	11	151750	0.00584583	5.03207e-06	1.6471e-12	0.871115	0.000137223	1.84728e-15
8	163436	12	139684	0.00589323	4.97149e-06	1.51932e-12	0.903151	0.000105208	5.5242e-16
8	163436	13	113390	0.00599443	5.08026e-06	1.54764e-12	0.895736	0.000112839	7.55503e-16
8	163436	14	97335	0.00606035	5.15823e-06	1.57447e-12	0.888931	0.000119778	9.88922e-16
8	163436	15	85307	0.00611845	5.20095e-06	1.56633e-12	0.891079	0.000117716	9.13675e-16
8	163436	16	92002	0.00595243	5.0273e-06	1.52644e-12	0.90149	0.000107185	5.99533e-16
8	163436	17	79458	0.00626611	5.3292e-06	1.56955e-12	0.890277	0.000118541	9.42959e-16
8	163436	18	87105	0.0059667	5.06923e-06	1.56297e-12	0.891961	0.000116856	8.83786e-16
8	163436	19	72794	0.00591053	5.06812e-06	1.62182e-12	0.877544	0.000131413	1.50869e-15
8	163436	1	225967	0.00599298	4.98885e-06	1.44063e-12	0.925248	8.21723e-05	1.86633e-16
8	163436	20	68877	0.00628663	5.38083e-06	1.61007e-12	0.880319	0.000128597	1.36609e-15
8	163436	21	45064	0.00564303	4.94778e-06	1.773e-12	0.844761	0.00016392	4.25321e-15
8	163436	22	40378	0.00603405	5.23803e-06	1.70355e-12	0.859443	0.000149826	2.77075e-15
8	163436	2	241241	0.0063373	5.2708e-06	1.43552e-12	0.926722	8.05706e-05	1.71407e-16
8	163436	3	212670	0.0061159	5.11222e-06	1.46459e-12	0.918225	8.94847e-05	2.70595e-16
8	163436	4	222241	0.00603437	5.04495e-06	1.46562e-12	0.917921	8.97937e-05	2.74715e-16
8	163436	5	193632	0.00600913	5.04977e-06	1.4961e-12	0.909347	9.86905e-05	4.16201e-16
8	163436	6	206165	0.00563277	4.7746e-06	1.54874e-12	0.895218	0.000113103	7.64379e-16
8	163436	7	177400	0.00582268	4.89272e-06	1.49565e-12	0.90953	9.85717e-05	4.13869e-16
8	163436	8	163436	0.00692017	5.53048e-06	1.22378e-12	1	0	0
9	129440	10	152251	0.00559407	4.73074e-06	1.53435e-12	0.899248	0.000109308	6.5495e-16
9	129440	11	151750	0.00546286	4.72476e-06	1.67863e-12	0.864071	0.000144308	2.33389e-15
9	129440	12	139684	0.00557642	4.69338e-06	1.50535e-12	0.907116	0.000101348	4.67438e-16
9	129440	13	113390	0.00562963	4.77994e-06	1.55916e-12	0.892919	0.000115873	8.50738e-16
9	129440	14	97335	0.00571035	4.86042e-06	1.57458e-12	0.889065	0.000119832	9.90094e-16
9	129440	15	85307	0.00577406	4.90404e-06	1.56103e-12	0.892598	0.000116375	8.66831e-16
9	129440	16	92002	0.00558258	4.7272e-06	1.54239e-12	0.897433	0.000111495	7.14707e-16
9	129440	17	79458	0.00587308	5.00984e-06	1.58837e-12	0.885713	0.000123303	1.12677e-15
9	129440	18	87105	0.00559086	4.76483e-06	1.58268e-12	0.887137	0.000121888	1.06907e-15
9	129440	19	72794	0.00556054	4.7723e-06	1.62765e-12	0.876315	0.000132815	1.58297e-15
9	129440	1	225967	0.0056218	4.69121e-06	1.45465e-12	0.92128	8.6505e-05	2.33196e-16
9	129440	20	68877	0.0058549	5.04464e-06	1.65333e-12	0.870246	0.000138733	1.93764e-15
9	129440	21	45064	0.00527703	4.64754e-06	1.80491e-12	0.838514	0.000170029	5.0719e-15
9	129440	22	40378	0.00567026	4.92998e-06	1.71431e-12	0.857257	0.000152125	2.97494e-15
9	129440	2	241241	0.00595539	4.96038e-06	1.44391e-12	0.924391	8.32017e-05	1.96891e-16
9	129440	3	212670	0.00573622	4.80696e-06	1.47944e-12	0.914145	9.38996e-05	3.33977e-16
9	129440	4	222241	0.00563434	4.73405e-06	1.49512e-12	0.909739	9.84301e-05	4.11117e-16
9	129440	5	193632	0.00564032	4.74996e-06	1.5089e-12	0.905989	0.000102325	4.88153e-16
9	129440	6	206165	0.00526287	4.48218e-06	1.57828e-12	0.887829	0.000120731	1.02584e-15
9	129440	7	177400	0.00547769	4.60693e-06	1.50098e-12	0.908221	0.000100107	4.42814e-16
9	129440	8	163436	0.00588841	4.96501e-06	1.51638e-12	0.903989	0.000104402	5.33719e-16
9	129440	9	129440	0.00614437	4.91046e-06	1.22376e-12	1	0	0

## Sheet: ACB
unscale:	chr1	chr2	chr3	chr4	chr5	chr6	chr7	chr8	chr9	chr10	chr11	chr12	chr13	chr14	chr15	chr16	chr17	chr18	chr19	chr20	chr21	chr22
chr1	0.00057496	0.000323395	0.000321563	0.000281026	0.000268382	0.000252466	0.00025931	0.000271058	0.000273266	0.000269307	0.000254425	0.000207057	0.000301217	0.000301873	0.00024304	0.000218579	0.000233789	0.000255062	0.000251512	0.000279859	0.000257233	0.000220123
chr2	0.000323395	0.000675095	0.000388256	0.000303505	0.000287804	0.000268846	0.000280438	0.000305643	0.000287753	0.000290081	0.000277481	0.000238895	0.000341744	0.000314693	0.000257115	0.000236871	0.000238896	0.000262306	0.000248091	0.000299868	0.000313438	0.000245101
chr3	0.000321563	0.000388256	0.000739815	0.00032712	0.000295505	0.000297013	0.000281192	0.000298707	0.000299218	0.000292793	0.000292887	0.000234625	0.00036235	0.000313623	0.000245224	0.000268108	0.00025401	0.000269913	0.000246093	0.000303026	0.000311012	0.000215386
chr4	0.000281026	0.000303505	0.00032712	0.000722779	0.000277229	0.000244615	0.000243937	0.000249592	0.00026221	0.000273476	0.000252112	0.000213273	0.000316307	0.000255876	0.000225274	0.000224069	0.000223527	0.00024854	0.000219161	0.000284904	0.00024842	0.000230695
chr5	0.000268382	0.000287804	0.000295505	0.000277229	0.000682848	0.000255317	0.000232491	0.000248766	0.00024672	0.000248012	0.000235777	0.000208434	0.000294731	0.00028094	0.000214153	0.00020657	0.000225418	0.000241829	0.000236052	0.000282016	0.000235429	0.000221327
chr6	0.000252466	0.000268846	0.000297013	0.000244615	0.000255317	0.00091203	0.000224808	0.000264071	0.000251753	0.000246161	0.00023425	0.000190742	0.000302155	0.000254863	0.000236074	0.000224776	0.000248073	0.000205208	0.00027361	0.000227739	0.000261838	0.000226098
chr7	0.00025931	0.000280438	0.000281192	0.000243937	0.000232491	0.000224808	0.000664719	0.000234575	0.000233793	0.000246653	0.000253237	0.000192415	0.000248418	0.000257235	0.000211688	0.000223045	0.000208845	0.000206265	0.000228315	0.000249087	0.000229477	0.000214482
chr8	0.000271058	0.000305643	0.000298707	0.000249592	0.000248766	0.000264071	0.000234575	0.000738885	0.000239561	0.000262746	0.000238359	0.000200877	0.000288021	0.000251908	0.000223902	0.000204918	0.000239792	0.000231319	0.000213686	0.000270469	0.00025389	0.000233581
chr9	0.000273266	0.000287753	0.000299218	0.00026221	0.00024672	0.000251753	0.000233793	0.000239561	0.000729091	0.000272708	0.00025067	0.000204185	0.00029806	0.000273964	0.000242136	0.000240271	0.00021811	0.000228692	0.000278267	0.000259696	0.000226174	0.000217822
chr10	0.000269307	0.000290081	0.000292793	0.000273476	0.000248012	0.000246161	0.000246653	0.000262746	0.000272708	0.000873192	0.000236415	0.000209934	0.000291322	0.000275385	0.000247402	0.000232751	0.000256328	0.000228757	0.000253317	0.000276537	0.000245112	0.000284327
chr11	0.000254425	0.000277481	0.000292887	0.000252112	0.000235777	0.00023425	0.000253237	0.000238359	0.00025067	0.000236415	0.00108273	0.000197787	0.000269172	0.000259822	0.000248165	0.000222248	0.000246998	0.000234889	0.000256903	0.00022784	0.000207637	0.000250131
chr12	0.000207057	0.000238895	0.000234625	0.000213273	0.000208434	0.000190742	0.000192415	0.000200877	0.000204185	0.000209934	0.000197787	0.000664398	0.00021079	0.000217855	0.000175919	0.000171396	0.000191867	0.000201679	0.000195734	0.000196121	0.000184688	0.000208636
chr13	0.000301217	0.000341744	0.00036235	0.000316307	0.000294731	0.000302155	0.000248418	0.000288021	0.00029806	0.000291322	0.000269172	0.00021079	0.000989172	0.000329153	0.000253418	0.000241941	0.000254416	0.000237087	0.000256028	0.000269383	0.000316846	0.000236864
chr14	0.000301873	0.000314693	0.000313623	0.000255876	0.00028094	0.000254863	0.000257235	0.000251908	0.000273964	0.000275385	0.000259822	0.000217855	0.000329153	0.00096651	0.000268139	0.00020982	0.000251788	0.000241897	0.000279391	0.000259537	0.000241519	0.000260089
chr15	0.00024304	0.000257115	0.000245224	0.000225274	0.000214153	0.000236074	0.000211688	0.000223902	0.000242136	0.000247402	0.000248165	0.000175919	0.000253418	0.000268139	0.000932691	0.000197391	0.000181268	0.000203987	0.000244906	0.00019866	0.000193524	0.000216583
chr16	0.000218579	0.000236871	0.000268108	0.000224069	0.00020657	0.000224776	0.000223045	0.000204918	0.000240271	0.000232751	0.000222248	0.000171396	0.000241941	0.00020982	0.000197391	0.000785111	0.000196482	0.000185088	0.00021169	0.000202361	0.000231063	0.000184579
chr17	0.000233789	0.000238896	0.00025401	0.000223527	0.000225418	0.000248073	0.000208845	0.000239792	0.00021811	0.000256328	0.000246998	0.000191867	0.000254416	0.000251788	0.000181268	0.000196482	0.00106899	0.000248523	0.000219193	0.00025498	0.000299924	0.000249677
chr18	0.000255062	0.000262306	0.000269913	0.00024854	0.000241829	0.000205208	0.000206265	0.000231319	0.000228692	0.000228757	0.000234889	0.000201679	0.000237087	0.000241897	0.000203987	0.000185088	0.000248523	0.00083729	0.000201492	0.00027274	0.000233656	0.00019629
chr19	0.000251512	0.000248091	0.000246093	0.000219161	0.000236052	0.00027361	0.000228315	0.000213686	0.000278267	0.000253317	0.000256903	0.000195734	0.000256028	0.000279391	0.000244906	0.00021169	0.000219193	0.000201492	0.00122183	0.000215468	0.000223454	0.00027503
chr20	0.000279859	0.000299868	0.000303026	0.000284904	0.000282016	0.000227739	0.000249087	0.000270469	0.000259696	0.000276537	0.00022784	0.000196121	0.000269383	0.000259537	0.00019866	0.000202361	0.00025498	0.00027274	0.000215468	0.00111417	0.000280566	0.000223972
chr21	0.000257233	0.000313438	0.000311012	0.00024842	0.000235429	0.000261838	0.000229477	0.00025389	0.000226174	0.000245112	0.000207637	0.000184688	0.000316846	0.000241519	0.000193524	0.000231063	0.000299924	0.000233656	0.000223454	0.000280566	0.0014995	0.000198771
chr22	0.000220123	0.000245101	0.000215386	0.000230695	0.000221327	0.000226098	0.000214482	0.000233581	0.000217822	0.000284327	0.000250131	0.000208636	0.000236864	0.000260089	0.000216583	0.000184579	0.000249677	0.00019629	0.00027503	0.000223972	0.000198771	0.00144321
scale:	chr1	chr2	chr3	chr4	chr5	chr6	chr7	chr8	chr9	chr10	chr11	chr12	chr13	chr14	chr15	chr16	chr17	chr18	chr19	chr20	chr21	chr22
chr1	1	0.522692	0.496531	0.438992	0.431615	0.350924	0.42287	0.419214	0.425955	0.382991	0.324699	0.338131	0.402758	0.408693	0.335282	0.328871	0.301137	0.371587	0.302945	0.353319	0.280184	0.244688
chr2	0.522692	1	0.552834	0.437192	0.426812	0.344596	0.421717	0.435898	0.413613	0.380414	0.32655	0.359748	0.421369	0.392876	0.327082	0.328644	0.283757	0.352387	0.275558	0.349103	0.314822	0.251239
chr3	0.496531	0.552834	1	0.450176	0.418671	0.363706	0.403975	0.40699	0.410895	0.366831	0.329295	0.337546	0.426832	0.374064	0.29803	0.355379	0.28824	0.346421	0.261137	0.337033	0.298441	0.210925
chr4	0.438992	0.437192	0.450176	1	0.397352	0.303032	0.354535	0.344032	0.364268	0.346621	0.286753	0.310403	0.376936	0.308743	0.276974	0.300464	0.256605	0.322705	0.235268	0.320569	0.241156	0.228549
chr5	0.431615	0.426812	0.418671	0.397352	1	0.325624	0.347873	0.353014	0.352866	0.323625	0.27609	0.312313	0.361592	0.348991	0.271071	0.285176	0.266414	0.32326	0.26088	0.326685	0.235291	0.22574
chr6	0.350924	0.344596	0.363706	0.303032	0.325624	1	0.290733	0.323884	0.311205	0.277623	0.23708	0.247022	0.320397	0.273637	0.258271	0.268201	0.253405	0.237085	0.261355	0.228013	0.226175	0.199314
chr7	0.42287	0.421717	0.403975	0.354535	0.347873	0.290733	1	0.337541	0.339064	0.326362	0.30069	0.292352	0.309044	0.324022	0.271706	0.312235	0.250285	0.279584	0.255865	0.292583	0.232556	0.221824
chr8	0.419214	0.435898	0.40699	0.344032	0.353014	0.323884	0.337541	1	0.329498	0.329713	0.268417	0.289456	0.339819	0.300935	0.272552	0.272054	0.272542	0.297362	0.227111	0.301303	0.244017	0.229108
chr9	0.425955	0.413613	0.410895	0.364268	0.352866	0.311205	0.339064	0.329498	1	0.344907	0.284502	0.296539	0.354431	0.32986	0.297067	0.321501	0.249849	0.296298	0.298078	0.291578	0.21909	0.215333
chr10	0.382991	0.380414	0.366831	0.346621	0.323625	0.277623	0.326362	0.329713	0.344907	1	0.244806	0.278165	0.316056	0.302509	0.276924	0.284141	0.267893	0.270405	0.247568	0.283273	0.216625	0.256442
chr11	0.324699	0.32655	0.329295	0.286753	0.27609	0.23708	0.30069	0.268417	0.284502	0.244806	1	0.235179	0.26206	0.256126	0.249275	0.243479	0.231654	0.249163	0.22531	0.209442	0.164675	0.202451
chr12	0.338131	0.359748	0.337546	0.310403	0.312313	0.247022	0.292352	0.289456	0.296539	0.278165	0.235179	1	0.2626	0.274802	0.226113	0.240269	0.230261	0.273751	0.219659	0.230691	0.187428	0.21608
chr13	0.402758	0.421369	0.426832	0.376936	0.361592	0.320397	0.309044	0.339819	0.354431	0.316056	0.26206	0.2626	1	0.339954	0.266697	0.2777	0.249997	0.263494	0.235257	0.259445	0.263278	0.200861
chr14	0.408693	0.392876	0.374064	0.308743	0.348991	0.273637	0.324022	0.300935	0.32986	0.302509	0.256126	0.274802	0.339954	1	0.285726	0.24385	0.250514	0.27221	0.259941	0.253096	0.203201	0.223319
chr15	0.335282	0.327082	0.29803	0.276974	0.271071	0.258271	0.271706	0.272552	0.297067	0.276924	0.249275	0.226113	0.266697	0.285726	1	0.233755	0.183772	0.233903	0.232178	0.197403	0.165909	0.18949
chr16	0.328871	0.328644	0.355379	0.300464	0.285176	0.268201	0.312235	0.272054	0.321501	0.284141	0.243479	0.240269	0.2777	0.24385	0.233755	1	0.217252	0.23147	0.218881	0.219308	0.216047	0.176128
chr17	0.301137	0.283757	0.28824	0.256605	0.266414	0.253405	0.250285	0.272542	0.249849	0.267893	0.231654	0.230261	0.249997	0.250514	0.183772	0.217252	1	0.266077	0.194024	0.236569	0.240078	0.203962
chr18	0.371587	0.352387	0.346421	0.322705	0.32326	0.237085	0.279584	0.297362	0.296298	0.270405	0.249163	0.273751	0.263494	0.27221	0.233903	0.23147	0.266077	1	0.201726	0.286204	0.211541	0.181361
chr19	0.302945	0.275558	0.261137	0.235268	0.26088	0.261355	0.255865	0.227111	0.298078	0.247568	0.22531	0.219659	0.235257	0.259941	0.232178	0.218881	0.194024	0.201726	1	0.186939	0.167261	0.210095
chr20	0.353319	0.349103	0.337033	0.320569	0.326685	0.228013	0.292583	0.301303	0.291578	0.283273	0.209442	0.230691	0.259445	0.253096	0.197403	0.219308	0.236569	0.286204	0.186939	1	0.220122	0.179329
chr21	0.280184	0.314822	0.298441	0.241156	0.235291	0.226175	0.232556	0.244017	0.21909	0.216625	0.164675	0.187428	0.263278	0.203201	0.165909	0.216047	0.240078	0.211541	0.167261	0.220122	1	0.137309
chr22	0.244688	0.251239	0.210925	0.228549	0.22574	0.199314	0.221824	0.229108	0.215333	0.256442	0.202451	0.21608	0.200861	0.223319	0.18949	0.176128	0.203962	0.181361	0.210095	0.179329	0.137309	1
raw result:
Tagi	SNPi	Tagj	SNPj	rsq	sd	pval	rsq_s	sd_s	pval_s
10	152251	10	152251	0.000873192	1.60146e-05	3.38664e-07	1	0	0
11	151748	10	152251	0.000236415	1.29213e-05	2.62448e-05	0.244806	0.0239259	0.000257124
11	151748	11	151748	0.00108273	2.0403e-05	3.77379e-07	1	0	0
12	139676	10	152251	0.000209934	9.77116e-06	1.38781e-05	0.278165	0.0258383	0.000211052
12	139676	11	151748	0.000197787	1.09778e-05	2.78947e-05	0.235179	0.0282843	0.00057141
12	139676	12	139676	0.000664398	1.16419e-05	2.82234e-07	1	0	0
13	113390	10	152251	0.000291322	1.24504e-05	9.88745e-06	0.316056	0.0199668	4.65407e-05
13	113390	11	151748	0.000269172	1.39216e-05	2.1089e-05	0.26206	0.0217002	0.000134829
13	113390	12	139676	0.00021079	1.04715e-05	1.7974e-05	0.2626	0.0260331	0.000271717
13	113390	13	113390	0.000989172	1.84435e-05	3.61744e-07	1	0	0
14	97335	10	152251	0.000275385	1.2247e-05	1.15818e-05	0.302509	0.0208212	6.52529e-05
14	97335	11	151748	0.000259822	1.37233e-05	2.29206e-05	0.256126	0.0222896	0.00016372
14	97335	12	139676	0.000217855	1.03546e-05	1.50824e-05	0.274802	0.0250576	0.000196381
14	97335	13	113390	0.000329153	1.32809e-05	7.86566e-06	0.339954	0.0185553	2.61056e-05
14	97335	14	97335	0.00096651	1.79689e-05	3.57587e-07	1	0	0
15	85307	10	152251	0.000247402	1.19349e-05	1.59983e-05	0.276924	0.0227219	0.00013008
15	85307	11	151748	0.000248165	1.34299e-05	2.52357e-05	0.249275	0.0231096	0.000209458
15	85307	12	139676	0.000175919	1.00732e-05	3.15578e-05	0.226113	0.0332875	0.0012265
15	85307	13	113390	0.000253418	1.27976e-05	1.9184e-05	0.266697	0.0225478	0.000146233
15	85307	14	97335	0.000268139	1.26754e-05	1.47599e-05	0.285726	0.0214865	9.2424e-05
15	85307	15	85307	0.000932691	1.72606e-05	3.5108e-07	1	0	0
16	91999	10	152251	0.000232751	1.08096e-05	1.37586e-05	0.284141	0.0236336	0.000137194
16	91999	11	151748	0.000222248	1.21405e-05	2.6189e-05	0.243479	0.0252319	0.000322554
16	91999	12	139676	0.000171396	9.12959e-06	2.37003e-05	0.240269	0.0343329	0.00109713
16	91999	13	113390	0.000241941	1.16007e-05	1.56167e-05	0.2777	0.0230794	0.000136765
16	91999	14	97335	0.00020982	1.13824e-05	2.54799e-05	0.24385	0.026677	0.000397466
16	91999	15	85307	0.000197391	1.11366e-05	2.97618e-05	0.233755	0.0286707	0.000615858
16	91999	16	91999	0.000785111	1.41699e-05	3.17631e-07	1	0	0
17	79453	10	152251	0.000256328	1.28786e-05	1.87992e-05	0.267893	0.0223158	0.000138004
17	79453	11	151748	0.000246998	1.4471e-05	3.45515e-05	0.231654	0.0234701	0.000295581
17	79453	12	139676	0.000191867	1.08909e-05	3.04866e-05	0.230261	0.0295005	0.000726896
17	79453	13	113390	0.000254416	1.379e-05	2.53947e-05	0.249997	0.0227483	0.000194794
17	79453	14	97335	0.000251788	1.36097e-05	2.51171e-05	0.250514	0.022919	0.000198938
17	79453	15	85307	0.000181268	1.32197e-05	8.19364e-05	0.183772	0.0330551	0.00256241
17	79453	16	91999	0.000196482	1.20088e-05	4.08409e-05	0.217252	0.0291295	0.000863491
17	79453	17	79453	0.00106899	2.01151e-05	3.75224e-07	1	0	0
18	87105	10	152251	0.000228757	1.11975e-05	1.69513e-05	0.270405	0.0242143	0.000183012
18	87105	11	151748	0.000234889	1.26176e-05	2.45061e-05	0.249163	0.0240471	0.000244875
18	87105	12	139676	0.000201679	9.52611e-06	1.47131e-05	0.273751	0.0271002	0.00027023
18	87105	13	113390	0.000237087	1.20156e-05	1.94569e-05	0.263494	0.0236858	0.000185757
18	87105	14	97335	0.000241897	1.18756e-05	1.71501e-05	0.27221	0.0232168	0.000151337
18	87105	15	85307	0.000203987	1.15638e-05	3.03293e-05	0.233903	0.0276891	0.00053789
18	87105	16	91999	0.000185088	1.04605e-05	2.99655e-05	0.23147	0.0310572	0.00086573
18	87105	17	79453	0.000248523	1.2562e-05	1.92543e-05	0.266077	0.0228851	0.000156381
18	87105	18	87105	0.00083729	1.52627e-05	3.30506e-07	1	0	0
19	72789	10	152251	0.000253317	1.3831e-05	2.61394e-05	0.247568	0.0227842	0.000203586
19	72789	11	151748	0.000256903	1.55784e-05	3.95879e-05	0.22531	0.0229407	0.000301296
19	72789	12	139676	0.000195734	1.17213e-05	3.7675e-05	0.219659	0.0289768	0.000811991
19	72789	13	113390	0.000256028	1.48252e-05	3.29857e-05	0.235257	0.0228651	0.000251637
19	72789	14	97335	0.000279391	1.4693e-05	2.25294e-05	0.259941	0.0213433	0.000130436
19	72789	15	85307	0.000244906	1.43284e-05	3.43616e-05	0.232178	0.0236567	0.000302117
19	72789	16	91999	0.00021169	1.29432e-05	4.0902e-05	0.218881	0.0268789	0.000618717
19	72789	17	79453	0.000219193	1.54009e-05	7.07685e-05	0.194024	0.0265358	0.000930504
19	72789	18	87105	0.000201492	1.341e-05	5.716e-05	0.201726	0.0286302	0.00106953
19	72789	19	72789	0.00122183	2.3316e-05	3.96862e-07	1	0	0
1	225952	10	152251	0.000269307	9.15924e-06	3.98317e-06	0.382991	0.0195382	1.99712e-05
1	225952	11	151748	0.000254425	1.0214e-05	7.70922e-06	0.324699	0.021173	5.27372e-05
1	225952	12	139676	0.000207057	7.68071e-06	5.62849e-06	0.338131	0.0249037	8.51715e-05
1	225952	13	113390	0.000301217	9.91108e-06	3.49109e-06	0.402758	0.0180433	1.1924e-05
1	225952	14	97335	0.000301873	9.79627e-06	3.30388e-06	0.408693	0.0179509	1.10234e-05
1	225952	15	85307	0.00024304	9.39558e-06	6.63424e-06	0.335282	0.0218059	5.21943e-05
1	225952	16	91999	0.000218579	8.47753e-06	6.72081e-06	0.328871	0.0239022	8.08398e-05
1	225952	17	79453	0.000233789	1.00842e-05	1.02572e-05	0.301137	0.0229908	9.80821e-05
1	225952	18	87105	0.000255062	8.90276e-06	4.41692e-06	0.371587	0.0205086	2.72807e-05
1	225952	19	72789	0.000251512	1.08798e-05	1.03745e-05	0.302945	0.0217168	7.65803e-05
1	225952	1	225952	0.00057496	9.76879e-06	2.49516e-07	1	0	0
20	68875	10	152251	0.000276537	1.32225e-05	1.54446e-05	0.283273	0.0210892	8.88499e-05
20	68875	11	151748	0.00022784	1.47641e-05	5.14479e-05	0.209442	0.0253523	0.000585679
20	68875	12	139676	0.000196121	1.11481e-05	3.06567e-05	0.230691	0.0287535	0.000654736
20	68875	13	113390	0.000269383	1.41385e-05	2.23524e-05	0.259445	0.0218185	0.000143229
20	68875	14	97335	0.000259537	1.39365e-05	2.44701e-05	0.253096	0.0224426	0.000176136
20	68875	15	85307	0.00019866	1.3548e-05	6.29265e-05	0.197403	0.0292315	0.00125356
20	68875	16	91999	0.000202361	1.22943e-05	3.9886e-05	0.219308	0.0281745	0.000734493
20	68875	17	79453	0.00025498	1.47149e-05	3.255e-05	0.236569	0.0229845	0.000251293
20	68875	18	87105	0.00027274	1.29089e-05	1.4833e-05	0.286204	0.0212801	8.84044e-05
20	68875	19	72789	0.000215468	1.57493e-05	8.26657e-05	0.186939	0.0271061	0.0011589
20	68875	1	225952	0.000279859	1.04552e-05	5.78969e-06	0.353319	0.0196044	2.78614e-05
20	68875	20	68875	0.00111417	2.10613e-05	3.82139e-07	1	0	0
21	45059	10	152251	0.000245112	1.54063e-05	4.56144e-05	0.216625	0.0237944	0.000403683
21	45059	11	151748	0.000207637	1.73013e-05	0.000138161	0.164675	0.0284297	0.00220794
21	45059	12	139676	0.000184688	1.30707e-05	7.2811e-05	0.187428	0.0317973	0.00207152
21	45059	13	113390	0.000316846	1.66781e-05	2.26117e-05	0.263278	0.0199785	9.57674e-05
21	45059	14	97335	0.000241519	1.62975e-05	6.03568e-05	0.203201	0.0243486	0.000563433
21	45059	15	85307	0.000193524	1.59059e-05	0.000130949	0.165909	0.0307474	0.00285397
21	45059	16	91999	0.000231063	1.44806e-05	4.50878e-05	0.216047	0.0249216	0.00048714
21	45059	17	79453	0.000299924	1.735e-05	3.28588e-05	0.240078	0.0208795	0.000163308
21	45059	18	87105	0.000233656	1.50248e-05	4.9908e-05	0.211541	0.0248132	0.000519346
21	45059	19	72789	0.000223454	1.8507e-05	0.000134929	0.167261	0.0265868	0.00163071
21	45059	1	225952	0.000257233	1.21301e-05	1.46171e-05	0.280184	0.0217059	0.000103867
21	45059	20	68875	0.000280566	1.76992e-05	4.62767e-05	0.220122	0.0219333	0.000277119
21	45059	21	45059	0.0014995	2.91312e-05	4.26259e-07	1	0	0
22	40377	10	152251	0.000284327	1.51855e-05	2.39529e-05	0.256442	0.02116	0.000132974
22	40377	11	151748	0.000250131	1.70163e-05	6.23194e-05	0.202451	0.0237668	0.000521003
22	40377	12	139676	0.000208636	1.28416e-05	4.19907e-05	0.21608	0.0271551	0.000675572
22	40377	13	113390	0.000236864	1.61673e-05	6.31402e-05	0.200861	0.0247719	0.000628895
22	40377	14	97335	0.000260089	1.60055e-05	4.19585e-05	0.223319	0.0228786	0.000308563
22	40377	15	85307	0.000216583	1.56141e-05	7.83048e-05	0.18949	0.0269429	0.00107689
22	40377	16	91999	0.000184579	1.41177e-05	9.87877e-05	0.176128	0.0323737	0.00277064
22	40377	17	79453	0.000249677	1.68968e-05	6.10493e-05	0.203962	0.0238483	0.000513065
22	40377	18	87105	0.00019629	1.4663e-05	9.00403e-05	0.181361	0.0299357	0.00187358
22	40377	19	72789	0.00027503	1.82195e-05	5.61236e-05	0.210095	0.0223502	0.00035687
22	40377	1	225952	0.000220123	1.18009e-05	2.43135e-05	0.244688	0.0251027	0.000310225
22	40377	20	68875	0.000223972	1.72418e-05	0.000101323	0.179329	0.0263817	0.00122328
22	40377	21	45059	0.000198771	2.0222e-05	0.000300345	0.137309	0.0305598	0.00543979
22	40377	22	40377	0.00144321	2.79523e-05	4.21102e-07	1	0	0
2	241239	10	152251	0.000290081	1.01115e-05	4.39346e-06	0.380414	0.0188679	1.78607e-05
2	241239	11	151748	0.000277481	1.12832e-05	8.11239e-06	0.32655	0.0201626	4.25155e-05
2	241239	12	139676	0.000238895	8.53221e-06	4.84013e-06	0.359748	0.0216924	3.87174e-05
2	241239	13	113390	0.000341744	1.10161e-05	3.21677e-06	0.421369	0.0168379	7.56851e-06
2	241239	14	97335	0.000314693	1.07671e-05	4.07938e-06	0.392876	0.0179535	1.29025e-05
2	241239	15	85307	0.000257115	1.03561e-05	7.81124e-06	0.327082	0.0212196	5.16842e-05
2	241239	16	91999	0.000236871	9.3639e-06	7.25084e-06	0.328644	0.0224657	6.35169e-05
2	241239	17	79453	0.000238896	1.10937e-05	1.37521e-05	0.283757	0.0230312	0.00012467
2	241239	18	87105	0.000262306	9.78467e-06	5.75513e-06	0.352387	0.020554	3.39502e-05
2	241239	19	72789	0.000248091	1.19417e-05	1.58587e-05	0.275558	0.0225015	0.00012766
2	241239	1	225952	0.000323395	8.25131e-06	1.26589e-06	0.522692	0.0152823	2.1798e-06
2	241239	20	68875	0.000299868	1.15319e-05	6.49742e-06	0.349103	0.0190823	2.62557e-05
2	241239	21	45059	0.000313438	1.34923e-05	1.01747e-05	0.314822	0.0191201	3.98306e-05
2	241239	22	40377	0.000245101	1.30357e-05	2.35581e-05	0.251239	0.023102	0.000202898
2	241239	2	241239	0.000675095	1.18659e-05	2.85738e-07	1	0	0
3	212656	10	152251	0.000292793	1.06449e-05	5.19556e-06	0.366831	0.0190403	2.13891e-05
3	212656	11	151748	0.000292887	1.19303e-05	8.16843e-06	0.329295	0.019595	3.67436e-05
3	212656	12	139676	0.000234625	8.9693e-06	6.3451e-06	0.337546	0.0224153	5.66641e-05
3	212656	13	113390	0.00036235	1.16642e-05	3.19919e-06	0.426832	0.0164149	6.49794e-06
3	212656	14	97335	0.000313623	1.13143e-05	5.03773e-06	0.374064	0.0183321	1.70322e-05
3	212656	15	85307	0.000245224	1.08721e-05	1.14408e-05	0.29803	0.0224491	9.30304e-05
3	212656	16	91999	0.000268108	9.96285e-06	5.66798e-06	0.355379	0.0202655	3.10477e-05
3	212656	17	79453	0.00025401	1.1731e-05	1.34558e-05	0.28824	0.0220461	9.87826e-05
3	212656	18	87105	0.000269913	1.03252e-05	6.36194e-06	0.346421	0.0203379	3.48348e-05
3	212656	19	72789	0.000246093	1.25811e-05	2.01408e-05	0.261137	0.022929	0.00016951
3	212656	1	225952	0.000321563	8.63323e-06	1.55119e-06	0.496531	0.0158412	3.08711e-06
3	212656	20	68875	0.000303026	1.2146e-05	7.6613e-06	0.337033	0.0192259	3.10898e-05
3	212656	21	45059	0.000311012	1.41975e-05	1.28485e-05	0.298441	0.0194964	5.31188e-05
3	212656	22	40377	0.000215386	1.36853e-05	4.76073e-05	0.210925	0.026463	0.000671297
3	212656	2	241239	0.000388256	9.77769e-06	1.2016e-06	0.552834	0.013673	1.11798e-06
3	212656	3	212656	0.000739815	1.32213e-05	3.05352e-07	1	0	0
4	222241	10	152251	0.000273476	1.04393e-05	6.30831e-06	0.346621	0.0200896	3.3107e-05
4	222241	11	151748	0.000252112	1.16516e-05	1.34937e-05	0.286753	0.0220871	0.000101544
4	222241	12	139676	0.000213273	8.7915e-06	8.56491e-06	0.310403	0.0248146	0.000117481
4	222241	13	113390	0.000316307	1.13183e-05	4.87648e-06	0.376936	0.0181802	1.59859e-05
4	222241	14	97335	0.000255876	1.09701e-05	1.00125e-05	0.308743	0.0215953	6.95241e-05
4	222241	15	85307	0.000225274	1.06778e-05	1.49183e-05	0.276974	0.0243204	0.000169531
4	222241	16	91999	0.000224069	9.69913e-06	1.04021e-05	0.300464	0.0240248	0.000117572
4	222241	17	79453	0.000223527	1.15016e-05	2.06636e-05	0.256605	0.0248076	0.000246498
4	222241	18	87105	0.00024854	1.01229e-05	8.16535e-06	0.322705	0.0218334	6.09875e-05
4	222241	19	72789	0.000219161	1.23555e-05	2.96735e-05	0.235268	0.0255716	0.000387655
4	222241	1	225952	0.000281026	8.32841e-06	2.30062e-06	0.438992	0.0180755	8.52643e-06
4	222241	20	68875	0.000284904	1.19288e-05	9.11268e-06	0.320569	0.0200866	4.50591e-05
4	222241	21	45059	0.00024842	1.38446e-05	2.835e-05	0.241156	0.0230534	0.000235972
4	222241	22	40377	0.000230695	1.35304e-05	3.46984e-05	0.228549	0.024624	0.000374763
4	222241	2	241239	0.000303505	9.20125e-06	2.51877e-06	0.437192	0.0174473	7.52919e-06
4	222241	3	212656	0.00032712	9.77361e-06	2.37646e-06	0.450176	0.0166496	5.56238e-06
4	222241	4	222241	0.000722779	1.28645e-05	3.00439e-07	1	0	0
5	193632	10	152251	0.000248012	1.0029e-05	7.93496e-06	0.323625	0.0217576	5.94869e-05
5	193632	11	151748	0.000235777	1.12365e-05	1.52435e-05	0.27609	0.0233345	0.000146053
5	193632	12	139676	0.000208434	8.49737e-06	8.19581e-06	0.312313	0.0253342	0.000124386
5	193632	13	113390	0.000294731	1.0887e-05	5.53489e-06	0.361592	0.0190477	2.26793e-05
5	193632	14	97335	0.00028094	1.07046e-05	6.26251e-06	0.348991	0.0197703	3.02466e-05
5	193632	15	85307	0.000214153	1.0308e-05	1.5858e-05	0.271071	0.0255261	0.000222575
5	193632	16	91999	0.00020657	9.34497e-06	1.23954e-05	0.285176	0.0261815	0.000201664
5	193632	17	79453	0.000225418	1.11343e-05	1.75704e-05	0.266414	0.0244428	0.000201147
5	193632	18	87105	0.000241829	9.78211e-06	7.94496e-06	0.32326	0.0222436	6.51846e-05
5	193632	19	72789	0.000236052	1.19914e-05	1.96393e-05	0.26088	0.0236046	0.000190549
5	193632	1	225952	0.000268382	8.02222e-06	2.38069e-06	0.431615	0.0187187	1.04812e-05
5	193632	20	68875	0.000282016	1.15441e-05	8.32977e-06	0.326685	0.0200857	4.18103e-05
5	193632	21	45059	0.000235429	1.3369e-05	3.05353e-05	0.235291	0.0240429	0.000305493
5	193632	22	40377	0.000221327	1.30729e-05	3.56806e-05	0.22574	0.025512	0.000450366
5	193632	2	241239	0.000287804	8.85509e-06	2.6716e-06	0.426812	0.0181228	9.63558e-06
5	193632	3	212656	0.000295505	9.33718e-06	2.97057e-06	0.418671	0.0180391	1.02126e-05
5	193632	4	222241	0.000277229	9.14393e-06	3.52499e-06	0.397352	0.0190437	1.55883e-05
5	193632	5	193632	0.000682848	1.20282e-05	2.88228e-07	1	0	0
6	206163	10	152251	0.000246161	1.17856e-05	1.55256e-05	0.277623	0.0226892	0.000128081
6	206163	11	151748	0.00023425	1.32339e-05	2.99209e-05	0.23708	0.0242045	0.000304463
6	206163	12	139676	0.000190742	9.97182e-06	2.20069e-05	0.247022	0.0292795	0.000540518
6	206163	13	113390	0.000302155	1.27831e-05	9.4968e-06	0.320397	0.0195187	4.03182e-05
6	206163	14	97335	0.000254863	1.24855e-05	1.70058e-05	0.273637	0.022275	0.000126109
6	206163	15	85307	0.000236074	1.21983e-05	2.10107e-05	0.258271	0.0237991	0.000204584
6	206163	16	91999	0.000224776	1.10539e-05	1.72673e-05	0.268201	0.0245611	0.000199695
6	206163	17	79453	0.000248073	1.31727e-05	2.34086e-05	0.253405	0.0230247	0.000193687
6	206163	18	87105	0.000205208	1.14224e-05	2.82133e-05	0.237085	0.02734	0.000486576
6	206163	19	72789	0.00027361	1.42182e-05	2.14881e-05	0.261355	0.0214964	0.000131317
6	206163	1	225952	0.000252466	9.31338e-06	5.50566e-06	0.350924	0.0208782	3.67161e-05
6	206163	20	68875	0.000227739	1.34286e-05	3.54399e-05	0.228013	0.0250093	0.000401456
6	206163	21	45059	0.000261838	1.58198e-05	3.90207e-05	0.226175	0.022608	0.000280544
6	206163	22	40377	0.000226098	1.54344e-05	6.31716e-05	0.199314	0.0256588	0.000740266
6	206163	2	241239	0.000268846	1.02702e-05	6.32717e-06	0.344596	0.0202618	3.50467e-05
6	206163	3	212656	0.000297013	1.09104e-05	5.41352e-06	0.363706	0.0189244	2.15977e-05
6	206163	4	222241	0.000244615	1.05974e-05	1.04367e-05	0.303032	0.0222939	8.48017e-05
6	206163	5	193632	0.000255317	1.02923e-05	7.83732e-06	0.325624	0.0212712	5.3109e-05
6	206163	6	206163	0.00091203	1.68279e-05	3.46915e-07	1	0	0
7	177384	10	152251	0.000246653	9.87211e-06	7.6171e-06	0.326362	0.0217922	5.79067e-05
7	177384	11	151748	0.000253237	1.11097e-05	1.09717e-05	0.30069	0.0217725	7.96606e-05
7	177384	12	139676	0.000192415	8.32764e-06	1.03956e-05	0.292352	0.0280369	0.000238919
7	177384	13	113390	0.000248418	1.05694e-05	9.71341e-06	0.309044	0.0219785	7.42217e-05
7	177384	14	97335	0.000257235	1.04646e-05	8.12662e-06	0.324022	0.0212546	5.3986e-05
7	177384	15	85307	0.000211688	1.01423e-05	1.55691e-05	0.271706	0.0257897	0.000229543
7	177384	16	91999	0.000223045	9.24157e-06	8.74139e-06	0.312235	0.0239016	9.91121e-05
7	177384	17	79453	0.000208845	1.09254e-05	2.20643e-05	0.250285	0.0264905	0.000349934
7	177384	18	87105	0.000206265	9.53887e-06	1.35281e-05	0.279584	0.026329	0.000222616
7	177384	19	72789	0.000228315	1.17876e-05	2.09411e-05	0.255865	0.0243101	0.000230424
7	177384	1	225952	0.00025931	7.86661e-06	2.5254e-06	0.42287	0.0192973	1.28314e-05
7	177384	20	68875	0.000249087	1.12695e-05	1.24002e-05	0.292583	0.0222366	9.63516e-05
7	177384	21	45059	0.000229477	1.31483e-05	3.16371e-05	0.232556	0.0245673	0.000347375
7	177384	22	40377	0.000214482	1.28555e-05	3.78085e-05	0.221824	0.0263036	0.000541371
7	177384	2	241239	0.000280438	8.69441e-06	2.75395e-06	0.421717	0.0184783	1.0918e-05
7	177384	3	212656	0.000281192	9.14025e-06	3.32574e-06	0.403975	0.0187852	1.3827e-05
7	177384	4	222241	0.000243937	8.88532e-06	5.23446e-06	0.354535	0.0214437	3.91892e-05
7	177384	5	193632	0.000232491	8.56896e-06	5.48636e-06	0.347873	0.0223542	4.97752e-05
7	177384	6	206163	0.000224808	1.00487e-05	1.18183e-05	0.290733	0.0239993	0.000133189
7	177384	7	177384	0.000664719	1.16486e-05	2.8234e-07	1	0	0
8	163436	10	152251	0.000262746	1.05322e-05	7.66334e-06	0.329713	0.0208939	4.71108e-05
8	163436	11	151748	0.000238359	1.17633e-05	1.75104e-05	0.268417	0.0233303	0.000162928
8	163436	12	139676	0.000200877	8.87231e-06	1.127e-05	0.289456	0.0268016	0.000208455
8	163436	13	113390	0.000288021	1.13495e-05	7.15889e-06	0.339819	0.0196744	3.29679e-05
8	163436	14	97335	0.000251908	1.1096e-05	1.11486e-05	0.300935	0.0219862	8.25148e-05
8	163436	15	85307	0.000223902	1.081e-05	1.60498e-05	0.272552	0.0245649	0.000187682
8	163436	16	91999	0.000204918	9.77613e-06	1.53076e-05	0.272054	0.0266959	0.000261158
8	163436	17	79453	0.000239792	1.16858e-05	1.66558e-05	0.272542	0.0232401	0.000151207
8	163436	18	87105	0.000231319	1.02007e-05	1.11993e-05	0.297362	0.0235051	0.000112397
8	163436	19	72789	0.000213686	1.25033e-05	3.43771e-05	0.227111	0.0263657	0.000499201
8	163436	1	225952	0.000271058	8.38316e-06	2.72734e-06	0.419214	0.0188485	1.20963e-05
8	163436	20	68875	0.000270469	1.20323e-05	1.15967e-05	0.301303	0.0210272	6.89059e-05
8	163436	21	45059	0.00025389	1.40331e-05	2.74384e-05	0.244017	0.0227139	0.000212778
8	163436	22	40377	0.000233581	1.37092e-05	3.47944e-05	0.229108	0.0244194	0.000359502
8	163436	2	241239	0.000305643	9.31923e-06	2.57689e-06	0.435898	0.0174398	7.60549e-06
8	163436	3	212656	0.000298707	9.75735e-06	3.39144e-06	0.40699	0.0181728	1.17686e-05
8	163436	4	222241	0.000249592	9.44895e-06	6.10375e-06	0.344032	0.0213156	4.3101e-05
8	163436	5	193632	0.000248766	9.1494e-06	5.44031e-06	0.353014	0.0212081	3.81578e-05
8	163436	6	206163	0.000264071	1.07883e-05	8.26471e-06	0.323884	0.0208947	5.05536e-05
8	163436	7	177384	0.000234575	8.96529e-06	6.33923e-06	0.337541	0.0224137	5.66517e-05
8	163436	8	163436	0.000738885	1.32018e-05	3.05088e-07	1	0	0
9	129436	10	152251	0.000272708	1.04872e-05	6.49674e-06	0.344907	0.0202107	3.45752e-05
9	129436	11	151748	0.00025067	1.17055e-05	1.40599e-05	0.284502	0.0222732	0.000108236
9	129436	12	139676	0.000204185	8.81252e-06	1.02813e-05	0.296539	0.0262423	0.000174766
9	129436	13	113390	0.00029806	1.13019e-05	6.14261e-06	0.354431	0.0191245	2.49444e-05
9	129436	14	97335	0.000273964	1.10802e-05	7.94002e-06	0.32986	0.0204354	4.30826e-05
9	129436	15	85307	0.000242136	1.07741e-05	1.16065e-05	0.297067	0.0227223	9.88003e-05
9	129436	16	91999	0.000240271	9.79227e-06	8.18563e-06	0.321501	0.0224455	6.90128e-05
9	129436	17	79453	0.00021811	1.15477e-05	2.31382e-05	0.249849	0.0255374	0.000305814
9	129436	18	87105	0.000228692	1.01168e-05	1.1341e-05	0.296298	0.0237684	0.000119069
9	129436	19	72789	0.000278267	1.25633e-05	1.22972e-05	0.298078	0.0207119	6.77375e-05
9	129436	1	225952	0.000273266	8.33271e-06	2.57774e-06	0.425955	0.018667	1.0925e-05
9	129436	20	68875	0.000259696	1.19112e-05	1.30923e-05	0.291578	0.0217357	8.93053e-05
9	129436	21	45059	0.000226174	1.38687e-05	4.13698e-05	0.21909	0.0252073	0.00048233
9	129436	22	40377	0.000217822	1.35744e-05	4.41e-05	0.215333	0.0261656	0.000594319
9	129436	2	241239	0.000287753	9.17358e-06	3.07795e-06	0.413613	0.0184112	1.1624e-05
9	129436	3	212656	0.000299218	9.68982e-06	3.27645e-06	0.410895	0.0181167	1.11921e-05
9	129436	4	222241	0.00026221	9.42226e-06	4.95927e-06	0.364268	0.0203261	2.84898e-05
9	129436	5	193632	0.00024672	9.07486e-06	5.442e-06	0.352866	0.021362	3.93289e-05
9	129436	6	206163	0.000251753	1.06702e-05	9.56615e-06	0.311205	0.0217838	6.9729e-05
9	129436	7	177384	0.000233793	8.896e-06	6.22863e-06	0.339064	0.0224752	5.62593e-05
9	129436	8	163436	0.000239561	9.46343e-06	7.23013e-06	0.329498	0.022265	6.06866e-05
9	129436	9	129436	0.000729091	1.29967e-05	3.02279e-07	1	0	0

## Sheet: ASW
unscale:	chr1	chr2	chr3	chr4	chr5	chr6	chr7	chr8	chr9	chr10	chr11	chr12	chr13	chr14	chr15	chr16	chr17	chr18	chr19	chr20	chr21	chr22
chr1	0.00146662	0.00108671	0.00113122	0.00106321	0.00104953	0.00112186	0.0010536	0.0011862	0.00105283	0.00108212	0.00103467	0.00104407	0.00101327	0.000994477	0.00105844	0.0011447	0.00109001	0.00106758	0.00108092	0.00107018	0.00105576	0.00113286
chr2	0.00108671	0.00148417	0.00110204	0.00106899	0.00108081	0.00109441	0.00107357	0.00117234	0.00108031	0.00106288	0.00106022	0.00104006	0.00103695	0.00102456	0.0010671	0.00107398	0.00106774	0.00111611	0.00107034	0.00104268	0.00110006	0.00105537
chr3	0.00113122	0.00110204	0.0017981	0.00113648	0.00114222	0.00118748	0.00111966	0.00124026	0.00108936	0.00109581	0.00110305	0.00106704	0.00106963	0.00100943	0.00109621	0.00109871	0.00114704	0.00113521	0.00110893	0.00105995	0.00115677	0.00113936
chr4	0.00106321	0.00106899	0.00113648	0.00179549	0.00108841	0.00108163	0.00104816	0.00122898	0.00109509	0.00112437	0.00108695	0.00108104	0.00103496	0.00102394	0.00111146	0.00103791	0.00107766	0.00115719	0.00111747	0.00108516	0.000968903	0.00115961
chr5	0.00104953	0.00108081	0.00114222	0.00108841	0.00175457	0.00110998	0.00105601	0.00113833	0.00108517	0.00110624	0.00107466	0.00105226	0.00105024	0.00103057	0.00113989	0.0011397	0.00110996	0.00113319	0.00112503	0.00108166	0.00106842	0.0010941
chr6	0.00112186	0.00109441	0.00118748	0.00108163	0.00110998	0.00189008	0.00110831	0.00132038	0.0011922	0.00118024	0.00113393	0.00110194	0.00108425	0.00107542	0.0011346	0.00125995	0.00118826	0.00119912	0.00112049	0.00107481	0.00109101	0.001139
chr7	0.0010536	0.00107357	0.00111966	0.00104816	0.00105601	0.00110831	0.00158422	0.00117568	0.00110625	0.00107106	0.00109442	0.00104251	0.00102386	0.00101809	0.00106481	0.00104719	0.00105899	0.00113247	0.0010954	0.00111747	0.00107269	0.00112158
chr8	0.0011862	0.00117234	0.00124026	0.00122898	0.00113833	0.00132038	0.00117568	0.0022082	0.00121349	0.00117786	0.00121322	0.00119737	0.00120404	0.00112808	0.00121013	0.0012579	0.00118559	0.00121948	0.00120964	0.00124343	0.00116355	0.00118866
chr9	0.00105283	0.00108031	0.00108936	0.00109509	0.00108517	0.0011922	0.00110625	0.00121349	0.00179264	0.00116652	0.00110714	0.00112503	0.00113231	0.0010409	0.00110459	0.00113133	0.00115204	0.00117717	0.00107915	0.00111316	0.00107348	0.00109713
chr10	0.00108212	0.00106288	0.00109581	0.00112437	0.00110624	0.00118024	0.00107106	0.00117786	0.00116652	0.00194836	0.00108169	0.00107955	0.00103581	0.00104265	0.00112178	0.00117289	0.0011046	0.00110787	0.00104707	0.00117448	0.00103501	0.0011399
chr11	0.00103467	0.00106022	0.00110305	0.00108695	0.00107466	0.00113393	0.00109442	0.00121322	0.00110714	0.00108169	0.00215788	0.00107964	0.00101036	0.00105872	0.00108588	0.00116375	0.00112886	0.00112449	0.00107517	0.00112996	0.00100798	0.00114846
chr12	0.00104407	0.00104006	0.00106704	0.00108104	0.00105226	0.00110194	0.00104251	0.00119737	0.00112503	0.00107955	0.00107964	0.00172063	0.00102425	0.00103977	0.00111797	0.0010866	0.00105402	0.00110119	0.00102355	0.00107699	0.00102448	0.00110737
chr13	0.00101327	0.00103695	0.00106963	0.00103496	0.00105024	0.00108425	0.00102386	0.00120404	0.00113231	0.00103581	0.00101036	0.00102425	0.00175559	0.000992339	0.00102068	0.00111522	0.00104909	0.00103969	0.000991897	0.000963707	0.00101352	0.000993593
chr14	0.000994477	0.00102456	0.00100943	0.00102394	0.00103057	0.00107542	0.00101809	0.00112808	0.0010409	0.00104265	0.00105872	0.00103977	0.000992339	0.00195277	0.00107697	0.00107006	0.00102298	0.00116875	0.00102723	0.00114716	0.000950786	0.00102095
chr15	0.00105844	0.0010671	0.00109621	0.00111146	0.00113989	0.0011346	0.00106481	0.00121013	0.00110459	0.00112178	0.00108588	0.00111797	0.00102068	0.00107697	0.00203558	0.00116178	0.00115066	0.00118023	0.00111318	0.00109373	0.000995126	0.00123583
chr16	0.0011447	0.00107398	0.00109871	0.00103791	0.0011397	0.00125995	0.00104719	0.0012579	0.00113133	0.00117289	0.00116375	0.0010866	0.00111522	0.00107006	0.00116178	0.00214013	0.00115701	0.00108399	0.00105826	0.00114441	0.00108162	0.00117231
chr17	0.00109001	0.00106774	0.00114704	0.00107766	0.00110996	0.00118826	0.00105899	0.00118559	0.00115204	0.0011046	0.00112886	0.00105402	0.00104909	0.00102298	0.00115066	0.00115701	0.00209066	0.00116888	0.00112081	0.00104622	0.00099924	0.00118887
chr18	0.00106758	0.00111611	0.00113521	0.00115719	0.00113319	0.00119912	0.00113247	0.00121948	0.00117717	0.00110787	0.00112449	0.00110119	0.00103969	0.00116875	0.00118023	0.00108399	0.00116888	0.00233564	0.00111827	0.00117846	0.00107073	0.00124847
chr19	0.00108092	0.00107034	0.00110893	0.00111747	0.00112503	0.00112049	0.0010954	0.00120964	0.00107915	0.00104707	0.00107517	0.00102355	0.000991897	0.00102723	0.00111318	0.00105826	0.00112081	0.00111827	0.00215062	0.00113147	0.000967477	0.00109274
chr20	0.00107018	0.00104268	0.00105995	0.00108516	0.00108166	0.00107481	0.00111747	0.00124343	0.00111316	0.00117448	0.00112996	0.00107699	0.000963707	0.00114716	0.00109373	0.00114441	0.00104622	0.00117846	0.00113147	0.00238036	0.00105312	0.00114636
chr21	0.00105576	0.00110006	0.00115677	0.000968903	0.00106842	0.00109101	0.00107269	0.00116355	0.00107348	0.00103501	0.00100798	0.00102448	0.00101352	0.000950786	0.000995126	0.00108162	0.00099924	0.00107073	0.000967477	0.00105312	0.00241009	0.000998797
chr22	0.00113286	0.00105537	0.00113936	0.00115961	0.0010941	0.001139	0.00112158	0.00118866	0.00109713	0.0011399	0.00114846	0.00110737	0.000993593	0.00102095	0.00123583	0.00117231	0.00118887	0.00124847	0.00109274	0.00114636	0.000998797	0.00271682
scale:	chr1	chr2	chr3	chr4	chr5	chr6	chr7	chr8	chr9	chr10	chr11	chr12	chr13	chr14	chr15	chr16	chr17	chr18	chr19	chr20	chr21	chr22
chr1	1	0.738713	0.698564	0.657007	0.656214	0.6757	0.693487	0.661054	0.651697	0.642196	0.583374	0.659608	0.634017	0.590077	0.615278	0.648739	0.625306	0.579113	0.611499	0.575384	0.565005	0.570986
chr2	0.738713	1	0.676427	0.656588	0.671686	0.655182	0.70236	0.649381	0.664663	0.626966	0.594167	0.653106	0.644913	0.604255	0.616562	0.604985	0.608829	0.601778	0.601855	0.557212	0.585156	0.528719
chr3	0.698564	0.676427	1	0.634124	0.644857	0.64581	0.665446	0.624105	0.608867	0.587211	0.561569	0.608699	0.60433	0.540824	0.575388	0.562249	0.594163	0.556033	0.566463	0.51458	0.558987	0.518532
chr4	0.657007	0.656588	0.634124	1	0.614895	0.588637	0.623369	0.618841	0.612483	0.602921	0.553746	0.617098	0.585133	0.548965	0.583786	0.53149	0.558599	0.56718	0.571209	0.527172	0.468516	0.528103
chr5	0.656214	0.671686	0.644857	0.614895	1	0.611203	0.63546	0.579969	0.614105	0.600207	0.553953	0.607764	0.60079	0.559046	0.605793	0.590511	0.582139	0.56198	0.581868	0.531677	0.522741	0.504153
chr6	0.6757	0.655182	0.64581	0.588637	0.611203	1	0.642456	0.648036	0.649916	0.616856	0.563056	0.613107	0.597483	0.56197	0.580856	0.628858	0.600341	0.572857	0.558253	0.508925	0.514207	0.505584
chr7	0.693487	0.70236	0.665446	0.623369	0.63546	0.642456	1	0.630577	0.659033	0.611752	0.593879	0.633878	0.616577	0.581392	0.595724	0.57118	0.584689	0.591232	0.596411	0.578236	0.552497	0.544064
chr8	0.661054	0.649381	0.624105	0.618841	0.579969	0.648036	0.630577	1	0.612081	0.569604	0.557402	0.61641	0.613907	0.54543	0.573219	0.580914	0.554223	0.539041	0.557627	0.544765	0.50741	0.488196
chr9	0.651697	0.664663	0.608867	0.612483	0.614105	0.649916	0.659033	0.612081	1	0.626585	0.564989	0.6433	0.641262	0.559008	0.581161	0.580314	0.598171	0.577956	0.552557	0.541692	0.519965	0.500498
chr10	0.642196	0.626966	0.587211	0.602921	0.600207	0.616856	0.611752	0.569604	0.626585	1	0.529234	0.591836	0.562414	0.536851	0.565863	0.576815	0.549883	0.521497	0.51402	0.54796	0.480653	0.498559
chr11	0.583374	0.594167	0.561569	0.553746	0.553953	0.563056	0.593879	0.557402	0.564989	0.529234	1	0.562326	0.521202	0.517899	0.520402	0.543741	0.533896	0.502887	0.501456	0.500861	0.444727	0.477222
chr12	0.659608	0.653106	0.608699	0.617098	0.607764	0.613107	0.633878	0.61641	0.6433	0.591836	0.562326	1	0.592033	0.569923	0.600338	0.56887	0.558568	0.551805	0.534902	0.534903	0.506474	0.515594
chr13	0.634017	0.644913	0.60433	0.585133	0.60079	0.597483	0.616577	0.613907	0.641262	0.562414	0.521202	0.592033	1	0.538713	0.542846	0.578261	0.550629	0.516	0.513396	0.474056	0.496253	0.458187
chr14	0.590077	0.604255	0.540824	0.548965	0.559046	0.56197	0.581392	0.54543	0.559008	0.536851	0.517899	0.569923	0.538713	1	0.543163	0.526149	0.509156	0.55005	0.504187	0.535112	0.44146	0.446454
chr15	0.615278	0.616562	0.575388	0.583786	0.605793	0.580856	0.595724	0.573219	0.581161	0.565863	0.520402	0.600338	0.542846	0.543163	1	0.559647	0.561076	0.544174	0.535277	0.49983	0.452665	0.529442
chr16	0.648739	0.604985	0.562249	0.53149	0.590511	0.628858	0.57118	0.580914	0.580314	0.576815	0.543741	0.56887	0.578261	0.526149	0.559647	1	0.550032	0.487272	0.496116	0.509881	0.479679	0.489642
chr17	0.625306	0.608829	0.594163	0.558599	0.582139	0.600341	0.584689	0.554223	0.598171	0.549883	0.533896	0.558568	0.550629	0.509156	0.561076	0.550032	1	0.531866	0.531868	0.471841	0.448568	0.502638
chr18	0.579113	0.601778	0.556033	0.56718	0.56198	0.572857	0.591232	0.539041	0.577956	0.521497	0.502887	0.551805	0.516	0.55005	0.544174	0.487272	0.531866	1	0.501783	0.502556	0.454503	0.499109
chr19	0.611499	0.601855	0.566463	0.571209	0.581868	0.558253	0.596411	0.557627	0.552557	0.51402	0.501456	0.534902	0.513396	0.504187	0.535277	0.496116	0.531868	0.501783	1	0.503217	0.428291	0.455594
chr20	0.575384	0.557212	0.51458	0.527172	0.531677	0.508925	0.578236	0.544765	0.541692	0.54796	0.500861	0.534903	0.474056	0.535112	0.49983	0.509881	0.471841	0.502556	0.503217	1	0.44307	0.454235
chr21	0.565005	0.585156	0.558987	0.468516	0.522741	0.514207	0.552497	0.50741	0.519965	0.480653	0.444727	0.506474	0.496253	0.44146	0.452665	0.479679	0.448568	0.454503	0.428291	0.44307	1	0.393933
chr22	0.570986	0.528719	0.518532	0.528103	0.504153	0.505584	0.544064	0.488196	0.500498	0.498559	0.477222	0.515594	0.458187	0.446454	0.529442	0.489642	0.502638	0.499109	0.455594	0.454235	0.393933	1
raw result:
Tagi	SNPi	Tagj	SNPj	rsq	sd	pval	rsq_s	sd_s	pval_s
10	152199	10	152199	0.00194836	5.55265e-05	1.96831e-06	1	0	0
11	151749	10	152199	0.00108169	4.57715e-05	9.50446e-06	0.529234	0.0214621	8.02542e-06
11	151749	11	151749	0.00215788	6.2453e-05	2.09315e-06	1	0	0
12	139677	10	152199	0.00107955	4.11317e-05	6.26122e-06	0.591836	0.0194625	3.48327e-06
12	139677	11	151749	0.00107964	4.3106e-05	7.54313e-06	0.562326	0.0204108	5.16182e-06
12	139677	12	139677	0.00172063	4.79979e-05	1.80721e-06	1	0	0
13	113386	10	152199	0.00103581	4.10632e-05	7.33295e-06	0.562414	0.0207041	5.46014e-06
13	113386	11	151749	0.00101036	4.28421e-05	9.58305e-06	0.521202	0.0221424	9.65578e-06
13	113386	12	139677	0.00102425	3.86205e-05	6.00706e-06	0.592033	0.0197979	3.72374e-06
13	113386	13	113386	0.00175559	4.91537e-05	1.83393e-06	1	0	0
14	97334	10	152199	0.00104265	4.32773e-05	8.80306e-06	0.536851	0.0214974	7.63163e-06
14	97334	11	151749	0.00105872	4.56011e-05	1.01989e-05	0.517899	0.0219728	9.60481e-06
14	97334	12	139677	0.00103977	4.07545e-05	7.00864e-06	0.569923	0.0204492	4.92994e-06
14	97334	13	113386	0.000992339	4.06738e-05	8.37322e-06	0.538713	0.0217801	7.92896e-06
14	97334	14	97334	0.00195277	5.56722e-05	1.97115e-06	1	0	0
15	85306	10	152199	0.00112178	4.49364e-05	7.64281e-06	0.565863	0.0201629	4.79537e-06
15	85306	11	151749	0.00108588	4.67847e-05	1.02105e-05	0.520402	0.0217577	9.06097e-06
15	85306	12	139677	0.00111797	4.23776e-05	6.13482e-06	0.600338	0.0190266	3.00664e-06
15	85306	13	113386	0.00102068	4.17672e-05	8.31896e-06	0.542846	0.0214657	7.25912e-06
15	85306	14	97334	0.00107697	4.45293e-05	8.66866e-06	0.543163	0.021149	6.82635e-06
15	85306	15	85306	0.00203558	5.84099e-05	2.0227e-06	1	0	0
16	91984	10	152199	0.00117289	4.65222e-05	7.34844e-06	0.576815	0.0195636	3.93958e-06
16	91984	11	151749	0.00116375	4.86784e-05	9.07772e-06	0.543741	0.0206523	6.18388e-06
16	91984	12	139677	0.0010866	4.30144e-05	7.29075e-06	0.56887	0.0202034	4.73291e-06
16	91984	13	113386	0.00111522	4.37266e-05	7.01817e-06	0.578261	0.0197783	4.0738e-06
16	91984	14	97334	0.00107006	4.55301e-05	9.7154e-06	0.526149	0.0216964	8.57686e-06
16	91984	15	85306	0.00116178	4.7356e-05	8.19093e-06	0.559647	0.0202129	5.06072e-06
16	91984	16	91984	0.00214013	6.18661e-05	2.08332e-06	1	0	0
17	79448	10	152199	0.0011046	4.53208e-05	8.40678e-06	0.549883	0.0207598	6.037e-06
17	79448	11	151749	0.00112886	4.78022e-05	9.53184e-06	0.533896	0.0211335	7.28879e-06
17	79448	12	139677	0.00105402	4.2219e-05	7.64053e-06	0.558568	0.0207388	5.64902e-06
17	79448	13	113386	0.00104909	4.25796e-05	8.05245e-06	0.550629	0.0210457	6.34051e-06
17	79448	14	97334	0.00102298	4.45807e-05	1.06848e-05	0.509156	0.0225163	1.13256e-05
17	79448	15	85306	0.00115066	4.67337e-05	8.0741e-06	0.561076	0.0202357	5.03217e-06
17	79448	16	91984	0.00115701	4.78985e-05	8.71196e-06	0.550032	0.0205426	5.78317e-06
17	79448	17	79448	0.00209066	6.02305e-05	2.05522e-06	1	0	0
18	87103	10	152199	0.00110787	4.77684e-05	1.02414e-05	0.521497	0.0215782	8.69419e-06
18	87103	11	151749	0.00112449	5.03374e-05	1.18871e-05	0.502887	0.022054	1.09558e-05
18	87103	12	139677	0.00110119	4.49277e-05	8.22111e-06	0.551805	0.0206445	5.82311e-06
18	87103	13	113386	0.00103969	4.47673e-05	1.01858e-05	0.516	0.0221232	1.0014e-05
18	87103	14	97334	0.00116875	4.84216e-05	8.73861e-06	0.55005	0.0204515	5.68097e-06
18	87103	15	85306	0.00118023	4.94929e-05	9.16969e-06	0.544174	0.0206025	6.10534e-06
18	87103	16	91984	0.00108399	4.97676e-05	1.31443e-05	0.487272	0.0227574	1.40681e-05
18	87103	17	79448	0.00116888	5.00051e-05	9.927e-06	0.531866	0.0210363	7.26565e-06
18	87103	18	87103	0.00233564	6.83294e-05	2.18502e-06	1	0	0
19	72789	10	152199	0.00104707	4.53682e-05	1.04425e-05	0.51402	0.0221865	1.02845e-05
19	72789	11	151749	0.00107517	4.79381e-05	1.17003e-05	0.501456	0.022394	1.1775e-05
19	72789	12	139677	0.00102355	4.24779e-05	8.79773e-06	0.534902	0.021673	7.9976e-06
19	72789	13	113386	0.000991897	4.26e-05	1.00826e-05	0.513396	0.0225721	1.10669e-05
19	72789	14	97334	0.00102723	4.52343e-05	1.11359e-05	0.504187	0.0226408	1.20366e-05
19	72789	15	85306	0.00111318	4.69743e-05	9.40074e-06	0.535277	0.0212251	7.33953e-06
19	72789	16	91984	0.00105826	4.75927e-05	1.2108e-05	0.496116	0.0226868	1.29376e-05
19	72789	17	79448	0.00112081	4.76475e-05	9.68157e-06	0.531868	0.0212976	7.63135e-06
19	72789	18	87103	0.00111827	5.01981e-05	1.20193e-05	0.501783	0.022179	1.13028e-05
19	72789	19	72789	0.00215062	6.2213e-05	2.08915e-06	1	0	0
1	225939	10	152199	0.00108212	3.82224e-05	4.63123e-06	0.642196	0.0175713	1.67304e-06
1	225939	11	151749	0.00103467	3.94608e-05	6.28605e-06	0.583374	0.0198405	3.98291e-06
1	225939	12	139677	0.00104407	3.57611e-05	4.09692e-06	0.659608	0.0171619	1.36862e-06
1	225939	13	113386	0.00101327	3.57234e-05	4.59668e-06	0.634017	0.0182983	2.06994e-06
1	225939	14	97334	0.000994477	3.72845e-05	5.87213e-06	0.590077	0.019947	3.88775e-06
1	225939	15	85306	0.00105844	3.86951e-05	5.31145e-06	0.615278	0.0186892	2.53821e-06
1	225939	16	91984	0.0011447	4.05494e-05	4.68459e-06	0.648739	0.0170487	1.42432e-06
1	225939	17	79448	0.00109001	3.95113e-05	5.13449e-06	0.625306	0.0181679	2.12584e-06
1	225939	18	87103	0.00106758	4.12511e-05	6.62131e-06	0.579113	0.0197923	4.06144e-06
1	225939	19	72789	0.00108092	3.99035e-05	5.52149e-06	0.611499	0.018693	2.6035e-06
1	225939	1	225939	0.00146662	3.96006e-05	1.58689e-06	1	0	0
20	68846	10	152199	0.00117448	4.88506e-05	8.87604e-06	0.54796	0.0204733	5.79227e-06
20	68846	11	151749	0.00112996	5.08444e-05	1.21339e-05	0.500861	0.0221045	1.12346e-05
20	68846	12	139677	0.00107699	4.50809e-05	9.10314e-06	0.534903	0.0213164	7.48671e-06
20	68846	13	113386	0.000963707	4.44924e-05	1.34381e-05	0.474056	0.0239079	1.90827e-05
20	68846	14	97334	0.00114716	4.86294e-05	9.5729e-06	0.535112	0.0210268	7.0791e-06
20	68846	15	85306	0.00109373	4.90983e-05	1.20208e-05	0.49983	0.0223658	1.18684e-05
20	68846	16	91984	0.00114441	5.07778e-05	1.14766e-05	0.509881	0.0218076	9.91736e-06
20	68846	17	79448	0.00104622	4.93213e-05	1.46002e-05	0.471841	0.0234541	1.80176e-05
20	68846	18	87103	0.00117846	5.32653e-05	1.23523e-05	0.502556	0.021863	1.06111e-05
20	68846	19	72789	0.00113147	5.0776e-05	1.20051e-05	0.503217	0.0220896	1.09975e-05
20	68846	1	225939	0.00107018	4.16317e-05	6.80176e-06	0.575384	0.019914	4.27035e-06
20	68846	20	68846	0.00238036	6.98078e-05	2.20639e-06	1	0	0
21	44964	10	152199	0.00103501	4.78145e-05	1.34721e-05	0.480653	0.0232688	1.62231e-05
21	44964	11	151749	0.00100798	5.00916e-05	1.7999e-05	0.444727	0.0244642	2.69251e-05
21	44964	12	139677	0.00102448	4.48442e-05	1.08742e-05	0.506474	0.0225484	1.16316e-05
21	44964	13	113386	0.00101352	4.51987e-05	1.17101e-05	0.496253	0.0229506	1.35307e-05
21	44964	14	97334	0.000950786	4.71671e-05	1.78754e-05	0.44146	0.0250261	3.03304e-05
21	44964	15	85306	0.000995126	4.85362e-05	1.67115e-05	0.452665	0.0243837	2.47778e-05
21	44964	16	91984	0.00108162	5.05059e-05	1.40573e-05	0.479679	0.0230605	1.57808e-05
21	44964	17	79448	0.00099924	4.92288e-05	1.73911e-05	0.448568	0.0244746	2.60673e-05
21	44964	18	87103	0.00107073	5.26309e-05	1.72345e-05	0.454503	0.0238204	2.22261e-05
21	44964	19	72789	0.000967477	4.96875e-05	2.05091e-05	0.428291	0.0252786	3.55764e-05
21	44964	1	225939	0.00105576	4.1715e-05	7.23645e-06	0.565005	0.0203876	5.04216e-06
21	44964	20	68846	0.00105312	5.29818e-05	1.88987e-05	0.44307	0.0242582	2.64263e-05
21	44964	21	44964	0.00241009	7.07907e-05	2.22024e-06	1	0	0
22	40362	10	152199	0.0011399	5.15907e-05	1.24176e-05	0.498559	0.0221209	1.14758e-05
22	40362	11	151749	0.00114846	5.43147e-05	1.47867e-05	0.477222	0.0227071	1.51481e-05
22	40362	12	139677	0.00110737	4.82345e-05	1.06636e-05	0.515594	0.0217338	9.36063e-06
22	40362	13	113386	0.000993593	4.77088e-05	1.57049e-05	0.458187	0.024122	2.26268e-05
22	40362	14	97334	0.00102095	5.0616e-05	1.78308e-05	0.446454	0.0243045	2.58364e-05
22	40362	15	85306	0.00123583	5.36157e-05	1.04961e-05	0.529442	0.0208608	7.15636e-06
22	40362	16	91984	0.00117231	5.43099e-05	1.36233e-05	0.489642	0.0222818	1.26891e-05
22	40362	17	79448	0.00118887	5.38506e-05	1.24575e-05	0.502638	0.0218494	1.05782e-05
22	40362	18	87103	0.00124847	5.7354e-05	1.3176e-05	0.499109	0.0217063	1.0598e-05
22	40362	19	72789	0.00109274	5.37447e-05	1.72751e-05	0.455594	0.0236532	2.14095e-05
22	40362	1	225939	0.00113286	4.48384e-05	7.28613e-06	0.570986	0.0197161	4.23116e-06
22	40362	20	68846	0.00114636	5.69709e-05	1.80022e-05	0.454235	0.02341	2.07945e-05
22	40362	21	44964	0.000998797	5.61767e-05	2.93989e-05	0.393933	0.0259438	5.48418e-05
22	40362	22	40362	0.00271682	8.09307e-05	2.34839e-06	1	0	0
2	241236	10	152199	0.00106288	3.82121e-05	4.96891e-06	0.626966	0.0182232	2.12915e-06
2	241236	11	151749	0.00106022	3.99627e-05	5.99867e-06	0.594167	0.0193367	3.34162e-06
2	241236	12	139677	0.00104006	3.59081e-05	4.22876e-06	0.653106	0.0174293	1.51443e-06
2	241236	13	113386	0.00103695	3.61938e-05	4.41686e-06	0.644913	0.0177664	1.71918e-06
2	241236	14	97334	0.00102456	3.78238e-05	5.52195e-06	0.604255	0.0192749	3.08511e-06
2	241236	15	85306	0.0010671	3.90098e-05	5.31052e-06	0.616562	0.0186035	2.47151e-06
2	241236	16	91984	0.00107398	3.99654e-05	5.69997e-06	0.604985	0.0189367	2.86106e-06
2	241236	17	79448	0.00106774	3.94829e-05	5.55845e-06	0.608829	0.0188651	2.74793e-06
2	241236	18	87103	0.00111611	4.20134e-05	5.96698e-06	0.601778	0.0187919	2.83427e-06
2	241236	19	72789	0.00107034	4.00125e-05	5.8048e-06	0.601855	0.0190874	3.01467e-06
2	241236	1	225939	0.00108671	3.40764e-05	2.88162e-06	0.738713	0.013767	3.61054e-07
2	241236	20	68846	0.00104268	4.15906e-05	7.51455e-06	0.557212	0.02067	5.62899e-06
2	241236	21	44964	0.00110006	4.24247e-05	6.57111e-06	0.585156	0.0194968	3.67011e-06
2	241236	22	40362	0.00105537	4.43177e-05	9.21973e-06	0.528719	0.021466	8.06247e-06
2	241236	2	241236	0.00148417	4.01808e-05	1.60376e-06	1	0	0
3	212670	10	152199	0.00109581	4.216e-05	6.50888e-06	0.587211	0.0195168	3.63399e-06
3	212670	11	151749	0.00110305	4.42621e-05	7.69533e-06	0.561569	0.0203015	5.07978e-06
3	212670	12	139677	0.00106704	3.95171e-05	5.59206e-06	0.608699	0.0189373	2.79246e-06
3	212670	13	113386	0.00106963	3.99133e-05	5.76289e-06	0.60433	0.0190961	2.97111e-06
3	212670	14	97334	0.00100943	4.13177e-05	8.32763e-06	0.540824	0.021557	7.49324e-06
3	212670	15	85306	0.00109621	4.30199e-05	7.04343e-06	0.575388	0.0199495	4.30065e-06
3	212670	16	91984	0.00109871	4.40495e-05	7.66844e-06	0.562249	0.0203422	5.09585e-06
3	212670	17	79448	0.00114704	4.40921e-05	6.48623e-06	0.594163	0.0190892	3.17445e-06
3	212670	18	87103	0.00113521	4.62339e-05	8.16354e-06	0.556033	0.0203365	5.3206e-06
3	212670	19	72789	0.00110893	4.42544e-05	7.52894e-06	0.566463	0.0201795	4.79086e-06
3	212670	1	225939	0.00113122	3.75175e-05	3.60317e-06	0.698564	0.015221	6.74051e-07
3	212670	20	68846	0.00105995	4.58997e-05	1.04184e-05	0.51458	0.0220249	9.94676e-06
3	212670	21	44964	0.00115677	4.71219e-05	8.17012e-06	0.558987	0.0202162	5.08791e-06
3	212670	22	40362	0.00113936	4.95991e-05	1.06392e-05	0.518532	0.0214856	8.74287e-06
3	212670	2	241236	0.00110204	3.73522e-05	3.92901e-06	0.676427	0.0162068	9.84851e-07
3	212670	3	212670	0.0017981	5.05588e-05	1.86539e-06	1	0	0
4	222221	10	152199	0.00112437	4.24421e-05	6.03329e-06	0.602921	0.0188471	2.84601e-06
4	222221	11	151749	0.00108695	4.4067e-05	8.0167e-06	0.553746	0.0206318	5.72819e-06
4	222221	12	139677	0.00108104	3.96465e-05	5.37888e-06	0.617098	0.0185699	2.44525e-06
4	222221	13	113386	0.00103496	3.95128e-05	6.31217e-06	0.585133	0.0199405	4.01511e-06
4	222221	14	97334	0.00102394	4.1432e-05	7.95503e-06	0.548965	0.021203	6.61037e-06
4	222221	15	85306	0.00111146	4.31522e-05	6.74854e-06	0.583786	0.0195947	3.77926e-06
4	222221	16	91984	0.00103791	4.34115e-05	9.0752e-06	0.53149	0.0216498	8.16894e-06
4	222221	17	79448	0.00107766	4.33307e-05	7.75747e-06	0.558599	0.0205895	5.48762e-06
4	222221	18	87103	0.00115719	4.64296e-05	7.69201e-06	0.56718	0.0198789	4.49009e-06
4	222221	19	72789	0.00111747	4.43131e-05	7.3412e-06	0.571209	0.0199816	4.45581e-06
4	222221	1	225939	0.00106321	3.66644e-05	4.20903e-06	0.657007	0.0171204	1.37701e-06
4	222221	20	68846	0.00108516	4.61077e-05	9.66106e-06	0.527172	0.0214988	8.20671e-06
4	222221	21	44964	0.000968903	4.53252e-05	1.41596e-05	0.468516	0.0240422	2.04426e-05
4	222221	22	40362	0.00115961	4.97601e-05	1.00482e-05	0.528103	0.0211015	7.56651e-06
4	222221	2	241236	0.00106899	3.69318e-05	4.24007e-06	0.656588	0.0171103	1.37726e-06
4	222221	3	212670	0.00113648	4.10776e-05	5.07605e-06	0.634124	0.0176858	1.80581e-06
4	222221	4	222221	0.00179549	5.04725e-05	1.86349e-06	1	0	0
5	193610	10	152199	0.00110624	4.17972e-05	6.05602e-06	0.600207	0.0190273	3.00972e-06
5	193610	11	151749	0.00107466	4.34599e-05	7.93728e-06	0.553953	0.0206909	5.78526e-06
5	193610	12	139677	0.00105226	3.89138e-05	5.56035e-06	0.607764	0.0190538	2.87919e-06
5	193610	13	113386	0.00105024	3.92549e-05	5.80105e-06	0.60079	0.0193266	3.19051e-06
5	193610	14	97334	0.00103057	4.10421e-05	7.46715e-06	0.559046	0.0208409	5.74101e-06
5	193610	15	85306	0.00113989	4.30028e-05	6.01929e-06	0.605793	0.0187245	2.72087e-06
5	193610	16	91984	0.0011397	4.39767e-05	6.58487e-06	0.590511	0.0192185	3.34215e-06
5	193610	17	79448	0.00110996	4.31966e-05	6.81275e-06	0.582139	0.0196585	3.87184e-06
5	193610	18	87103	0.00113319	4.56783e-05	7.83539e-06	0.56198	0.0201516	4.9177e-06
5	193610	19	72789	0.00112503	4.3916e-05	6.89536e-06	0.581868	0.0195967	3.83068e-06
5	193610	1	225939	0.00104953	3.61347e-05	4.18228e-06	0.656214	0.017233	1.42031e-06
5	193610	20	68846	0.00108166	4.55586e-05	9.33095e-06	0.531677	0.0213774	7.75685e-06
5	193610	21	44964	0.00106842	4.56953e-05	9.91662e-06	0.522741	0.0217785	8.93475e-06
5	193610	22	40362	0.0010941	4.85788e-05	1.1508e-05	0.504153	0.0221328	1.10017e-05
5	193610	2	241236	0.00108081	3.67041e-05	3.95962e-06	0.671686	0.0164954	1.08685e-06
5	193610	3	212670	0.00114222	4.07264e-05	4.80791e-06	0.644857	0.0172804	1.5396e-06
5	193610	4	222221	0.00108841	4.00842e-05	5.46913e-06	0.614895	0.0185896	2.4909e-06
5	193610	5	193610	0.00175457	4.91199e-05	1.83317e-06	1	0	0
6	206159	10	152199	0.00118024	4.40692e-05	5.77776e-06	0.616856	0.0181417	2.23148e-06
6	206159	11	151749	0.00113393	4.56373e-05	7.78725e-06	0.563056	0.020118	4.84802e-06
6	206159	12	139677	0.00110194	4.08128e-05	5.59385e-06	0.613107	0.0186084	2.53016e-06
6	206159	13	113386	0.00108425	4.09966e-05	6.07393e-06	0.597483	0.0192556	3.214e-06
6	206159	14	97334	0.00107542	4.29836e-05	7.57546e-06	0.56197	0.0204959	5.26132e-06
6	206159	15	85306	0.0011346	4.44415e-05	6.98993e-06	0.580856	0.0195955	3.85643e-06
6	206159	16	91984	0.00125995	4.68495e-05	5.6825e-06	0.628858	0.0174684	1.77701e-06
6	206159	17	79448	0.00118826	4.55653e-05	6.42331e-06	0.600341	0.0187226	2.81956e-06
6	206159	18	87103	0.00119912	4.80023e-05	7.62232e-06	0.572857	0.0195426	4.03183e-06
6	206159	19	72789	0.00112049	4.54282e-05	8.01773e-06	0.558253	0.0203993	5.30156e-06
6	206159	1	225939	0.00112186	3.81968e-05	4.00055e-06	0.6757	0.0161331	9.71237e-07
6	206159	20	68846	0.00107481	4.71793e-05	1.09961e-05	0.508925	0.022126	1.05844e-05
6	206159	21	44964	0.00109101	4.76093e-05	1.07418e-05	0.514207	0.0219337	9.81228e-06
6	206159	22	40362	0.001139	5.08209e-05	1.17344e-05	0.505584	0.0218939	1.04192e-05
6	206159	2	241236	0.00109441	3.80705e-05	4.35771e-06	0.655182	0.0170313	1.36366e-06
6	206159	3	212670	0.00118748	4.2617e-05	4.9343e-06	0.64581	0.0170668	1.45643e-06
6	206159	4	222221	0.00108163	4.13972e-05	6.37484e-06	0.588637	0.0195232	3.6038e-06
6	206159	5	193610	0.00110998	4.12687e-05	5.68011e-06	0.611203	0.0186172	2.56662e-06
6	206159	6	206159	0.00189008	5.35995e-05	1.92985e-06	1	0	0
7	177384	10	152199	0.00107106	3.94858e-05	5.4917e-06	0.611752	0.0187755	2.64525e-06
7	177384	11	151749	0.00109442	4.15995e-05	6.20251e-06	0.593879	0.0192343	3.27795e-06
7	177384	12	139677	0.00104251	3.70248e-05	4.73292e-06	0.633878	0.0181691	2.01401e-06
7	177384	13	113386	0.00102386	3.71536e-05	5.15647e-06	0.616577	0.0189122	2.6389e-06
7	177384	14	97334	0.00101809	3.89536e-05	6.36709e-06	0.581392	0.0201522	4.29601e-06
7	177384	15	85306	0.00106481	4.02041e-05	6.0394e-06	0.595724	0.0193976	3.34863e-06
7	177384	16	91984	0.00104719	4.09434e-05	6.93976e-06	0.57118	0.0202874	4.73471e-06
7	177384	17	79448	0.00105899	4.06314e-05	6.43798e-06	0.584689	0.019799	3.91452e-06
7	177384	18	87103	0.00113247	4.35136e-05	6.47505e-06	0.591232	0.0191454	3.27577e-06
7	177384	19	72789	0.0010954	4.15474e-05	6.14963e-06	0.596411	0.0192107	3.20712e-06
7	177384	1	225939	0.0010536	3.46077e-05	3.46727e-06	0.693487	0.0157923	8.03983e-07
7	177384	20	68846	0.00111747	4.37211e-05	6.95865e-06	0.578236	0.0196604	3.97862e-06
7	177384	21	44964	0.00107269	4.35025e-05	8.0267e-06	0.552497	0.0207762	5.94275e-06
7	177384	22	40362	0.00112158	4.64459e-05	8.72238e-06	0.544064	0.0207174	6.24702e-06
7	177384	2	241236	0.00107357	3.50379e-05	3.37967e-06	0.70236	0.0153449	6.81325e-07
7	177384	3	212670	0.00111966	3.86654e-05	4.23275e-06	0.665446	0.0165975	1.15622e-06
7	177384	4	222221	0.00104816	3.78079e-05	5.03486e-06	0.623369	0.0184814	2.30433e-06
7	177384	5	193610	0.00105601	3.75067e-05	4.73407e-06	0.63546	0.0180145	1.92722e-06
7	177384	6	206159	0.00110831	3.93783e-05	4.74087e-06	0.642456	0.0174904	1.63986e-06
7	177384	7	177384	0.00158422	4.34883e-05	1.695e-06	1	0	0
8	163436	10	152199	0.00117786	4.7241e-05	7.68031e-06	0.569604	0.0197277	4.28226e-06
8	163436	11	151749	0.00121322	4.98956e-05	8.4867e-06	0.557402	0.0199782	4.90866e-06
8	163436	12	139677	0.00119737	4.48325e-05	5.84163e-06	0.61641	0.0180642	2.20006e-06
8	163436	13	113386	0.00120404	4.53188e-05	5.96463e-06	0.613907	0.0181515	2.2795e-06
8	163436	14	97334	0.00112808	4.6779e-05	8.77014e-06	0.54543	0.0207516	6.22583e-06
8	163436	15	85306	0.00121013	4.85467e-05	7.68757e-06	0.573219	0.0195348	4.01537e-06
8	163436	16	91984	0.0012579	5.01794e-05	7.51701e-06	0.580914	0.0191036	3.48348e-06
8	163436	17	79448	0.00118559	4.889e-05	8.57735e-06	0.554223	0.0202432	5.29239e-06
8	163436	18	87103	0.00121948	5.18117e-05	9.6588e-06	0.539041	0.0205524	6.279e-06
8	163436	19	72789	0.00120964	4.97815e-05	8.50908e-06	0.557627	0.0200477	4.96903e-06
8	163436	1	225939	0.0011862	4.1587e-05	4.49541e-06	0.661054	0.0163712	1.1239e-06
8	163436	20	68846	0.00124343	5.25076e-05	9.42702e-06	0.544765	0.0203068	5.73902e-06
8	163436	21	44964	0.00116355	5.20284e-05	1.18352e-05	0.50741	0.0218058	1.01076e-05
8	163436	22	40362	0.00118866	5.52894e-05	1.38427e-05	0.488196	0.0222136	1.26839e-05
8	163436	2	241236	0.00117234	4.16448e-05	4.73702e-06	0.649381	0.0168592	1.35682e-06
8	163436	3	212670	0.00124026	4.62232e-05	5.73449e-06	0.624105	0.0176329	1.90141e-06
8	163436	4	222221	0.00122898	4.60642e-05	5.86598e-06	0.618841	0.0178513	2.06577e-06
8	163436	5	193610	0.00113833	4.4586e-05	6.9889e-06	0.579969	0.0195211	3.82162e-06
8	163436	6	206159	0.00132038	4.81938e-05	5.27765e-06	0.648036	0.0165598	1.27367e-06
8	163436	7	177384	0.00117568	4.29375e-05	5.28997e-06	0.630577	0.0175909	1.80748e-06
8	163436	8	163436	0.0022082	6.41164e-05	2.12035e-06	1	0	0
9	129409	10	152199	0.00116652	4.28848e-05	5.43075e-06	0.626585	0.0178823	1.97942e-06
9	129409	11	151749	0.00110714	4.42407e-05	7.56822e-06	0.564989	0.0202025	4.86285e-06
9	129409	12	139677	0.00112503	4.0121e-05	4.8115e-06	0.6433	0.0174655	1.62205e-06
9	129409	13	113386	0.00113231	4.05666e-05	4.90036e-06	0.641262	0.0175292	1.66675e-06
9	129409	14	97334	0.0010409	4.1571e-05	7.55154e-06	0.559008	0.0208119	5.7107e-06
9	129409	15	85306	0.00110459	4.30472e-05	6.85045e-06	0.581161	0.0197498	3.97056e-06
9	129409	16	91984	0.00113133	4.43277e-05	6.99891e-06	0.580314	0.0196287	3.89703e-06
9	129409	17	79448	0.00115204	4.40852e-05	6.37078e-06	0.598171	0.018965	3.01115e-06
9	129409	18	87103	0.00117717	4.66059e-05	7.2946e-06	0.577956	0.0194791	3.84185e-06
9	129409	19	72789	0.00107915	4.38859e-05	8.11573e-06	0.552557	0.02081	5.97875e-06
9	129409	1	225939	0.00105283	3.65166e-05	4.30692e-06	0.651697	0.0174096	1.52063e-06
9	129409	20	68846	0.00111316	4.6347e-05	8.91193e-06	0.541692	0.0209395	6.63222e-06
9	129409	21	44964	0.00107348	4.62281e-05	1.01912e-05	0.519965	0.0218699	9.27909e-06
9	129409	22	40362	0.00109713	4.9128e-05	1.19021e-05	0.500498	0.0222614	1.15883e-05
9	129409	2	241236	0.00108031	3.70409e-05	4.11399e-06	0.664663	0.0167901	1.21641e-06
9	129409	3	212670	0.00108936	4.05156e-05	5.68764e-06	0.608867	0.0188274	2.7254e-06
9	129409	4	222221	0.00109509	4.05525e-05	5.59019e-06	0.612483	0.0186715	2.57496e-06
9	129409	5	193610	0.00108517	4.00191e-05	5.49877e-06	0.614105	0.0186693	2.54679e-06
9	129409	6	206159	0.0011922	4.2616e-05	4.85648e-06	0.649916	0.0169344	1.3766e-06
9	129409	7	177384	0.00110625	3.84541e-05	4.34504e-06	0.659033	0.0169317	1.30132e-06
9	129409	8	163436	0.00121349	4.5856e-05	6.05946e-06	0.612081	0.0181738	2.31801e-06
9	129409	9	129409	0.00179264	5.03784e-05	1.86142e-06	1	0	0

## Sheet: BEB
unscale:	chr1	chr2	chr3	chr4	chr5	chr6	chr7	chr8	chr9	chr10	chr11	chr12	chr13	chr14	chr15	chr16	chr17	chr18	chr19	chr20	chr21	chr22
chr1	0.000509679	0.000149425	0.000158677	0.000133708	0.00012833	0.000145528	0.000147323	0.000145907	0.000142466	0.000144131	0.000134398	0.000150416	0.000154482	0.000133543	0.000132945	0.000145742	0.000121351	0.000134888	0.000140076	0.000133961	0.00014592	0.000148917
chr2	0.000149425	0.000497151	0.000156861	0.000139302	0.00012707	0.000144127	0.000152834	0.000158356	0.000137999	0.000142083	0.000128791	0.00014092	0.000147012	0.000137537	0.000122894	0.00015308	0.000124293	0.000142598	0.000141532	0.000115894	0.000127971	0.000126654
chr3	0.000158677	0.000156861	0.000628791	0.000156164	0.000120789	0.000120765	0.000147736	0.00015351	0.000146368	0.00015918	0.000151534	0.000147871	0.000160592	0.000129891	0.000132547	0.000147032	0.000143317	0.000129415	0.00013415	0.00012414	0.000141299	0.000131255
chr4	0.000133708	0.000139302	0.000156164	0.000595162	0.000138363	0.000143626	0.000141919	0.000142182	0.00013173	0.000150287	0.000153292	0.000141489	0.000148419	0.000132229	0.000127494	0.000141503	0.000121563	0.000130293	0.000129469	0.000121186	0.000139158	0.000122534
chr5	0.00012833	0.00012707	0.000120789	0.000138363	0.000688872	0.000140406	0.00014031	0.000133469	0.000143905	0.000136891	0.000120624	0.000107209	0.000155271	0.000122768	0.00012278	0.000128941	0.000135812	0.000142784	0.000127074	0.000149287	0.00011898	0.000133188
chr6	0.000145528	0.000144127	0.000120765	0.000143626	0.000140406	0.000920347	0.00013991	0.000137119	0.000136711	0.000148382	0.000131531	0.000133456	0.000142476	0.000146401	0.000121844	0.000135907	0.000137717	0.000140763	0.000123862	0.000154284	0.000130676	0.000141348
chr7	0.000147323	0.000152834	0.000147736	0.000141919	0.00014031	0.00013991	0.00069425	0.000139489	0.00014437	0.000146178	0.000139022	0.000130675	0.000142147	0.00012592	0.000138175	0.000140811	0.000137613	0.000132312	0.000140855	0.000128282	0.00015504	0.000136501
chr8	0.000145907	0.000158356	0.00015351	0.000142182	0.000133469	0.000137119	0.000139489	0.000725526	0.000151061	0.000146418	0.000115777	0.000154658	0.000149104	0.000134039	0.000139231	0.000162055	0.000140507	0.000128105	0.00012215	0.000124499	0.000119738	0.000154865
chr9	0.000142466	0.000137999	0.000146368	0.00013173	0.000143905	0.000136711	0.00014437	0.000151061	0.000728866	0.000143762	0.000153803	0.000145745	0.000126776	0.000132386	0.000148632	0.000136056	0.000133337	0.000131831	0.000120526	0.000156786	0.000140905	0.000128966
chr10	0.000144131	0.000142083	0.00015918	0.000150287	0.000136891	0.000148382	0.000146178	0.000146418	0.000143762	0.000764703	0.000117092	0.000149927	0.000154195	0.000127716	0.000143134	0.000155455	0.000125808	0.0001352	0.000122178	0.000147181	0.000165773	0.000107122
chr11	0.000134398	0.000128791	0.000151534	0.000153292	0.000120624	0.000131531	0.000139022	0.000115777	0.000153803	0.000117092	0.00119304	0.000152333	0.000155749	0.000199294	0.000150421	0.000147095	0.000123166	0.000148972	0.000148042	0.000141016	0.000144292	0.000135398
chr12	0.000150416	0.00014092	0.000147871	0.000141489	0.000107209	0.000133456	0.000130675	0.000154658	0.000145745	0.000149927	0.000152333	0.000724517	0.000152104	0.000125967	0.000144118	0.000149756	0.000111312	0.00013011	0.000127711	0.000175395	0.000120311	0.000130146
chr13	0.000154482	0.000147012	0.000160592	0.000148419	0.000155271	0.000142476	0.000142147	0.000149104	0.000126776	0.000154195	0.000155749	0.000152104	0.00095517	0.000125256	0.000124127	0.00018121	0.000133418	0.000141644	0.00013714	8.4122e-05	0.000162435	0.000112893
chr14	0.000133543	0.000137537	0.000129891	0.000132229	0.000122768	0.000146401	0.00012592	0.000134039	0.000132386	0.000127716	0.000199294	0.000125967	0.000125256	0.00102724	0.000104588	0.000112169	0.000161329	0.000127051	0.000130464	0.000149602	0.00021443	0.000126701
chr15	0.000132945	0.000122894	0.000132547	0.000127494	0.00012278	0.000121844	0.000138175	0.000139231	0.000148632	0.000143134	0.000150421	0.000144118	0.000124127	0.000104588	0.000936786	0.000130333	0.000137673	0.000139322	0.000134369	0.000146804	0.000118882	0.000135102
chr16	0.000145742	0.00015308	0.000147032	0.000141503	0.000128941	0.000135907	0.000140811	0.000162055	0.000136056	0.000155455	0.000147095	0.000149756	0.00018121	0.000112169	0.000130333	0.000804312	0.000116504	0.000149083	0.000140156	0.000119382	0.000138869	0.000129776
chr17	0.000121351	0.000124293	0.000143317	0.000121563	0.000135812	0.000137717	0.000137613	0.000140507	0.000133337	0.000125808	0.000123166	0.000111312	0.000133418	0.000161329	0.000137673	0.000116504	0.00111457	0.000122617	0.00012143	0.000150809	0.000133473	0.000142347
chr18	0.000134888	0.000142598	0.000129415	0.000130293	0.000142784	0.000140763	0.000132312	0.000128105	0.000131831	0.0001352	0.000148972	0.00013011	0.000141644	0.000127051	0.000139322	0.000149083	0.000122617	0.000959133	0.000150244	0.00012694	0.000117712	0.000137173
chr19	0.000140076	0.000141532	0.00013415	0.000129469	0.000127074	0.000123862	0.000140855	0.00012215	0.000120526	0.000122178	0.000148042	0.000127711	0.00013714	0.000130464	0.000134369	0.000140156	0.00012143	0.000150244	0.00112305	0.000157062	0.000159938	0.000140052
chr20	0.000133961	0.000115894	0.00012414	0.000121186	0.000149287	0.000154284	0.000128282	0.000124499	0.000156786	0.000147181	0.000141016	0.000175395	8.4122e-05	0.000149602	0.000146804	0.000119382	0.000150809	0.00012694	0.000157062	0.0013524	0.000125077	0.000144084
chr21	0.00014592	0.000127971	0.000141299	0.000139158	0.00011898	0.000130676	0.00015504	0.000119738	0.000140905	0.000165773	0.000144292	0.000120311	0.000162435	0.00021443	0.000118882	0.000138869	0.000133473	0.000117712	0.000159938	0.000125077	0.00163633	0.000133515
chr22	0.000148917	0.000126654	0.000131255	0.000122534	0.000133188	0.000141348	0.000136501	0.000154865	0.000128966	0.000107122	0.000135398	0.000130146	0.000112893	0.000126701	0.000135102	0.000129776	0.000142347	0.000137173	0.000140052	0.000144084	0.000133515	0.00150076
scale:	chr1	chr2	chr3	chr4	chr5	chr6	chr7	chr8	chr9	chr10	chr11	chr12	chr13	chr14	chr15	chr16	chr17	chr18	chr19	chr20	chr21	chr22
chr1	1	0.299391	0.282575	0.244754	0.218342	0.213974	0.249762	0.242009	0.236018	0.232877	0.173584	0.249844	0.223406	0.186299	0.194459	0.230181	0.16263	0.194935	0.187102	0.162935	0.161582	0.172441
chr2	0.299391	1	0.28279	0.258143	0.218867	0.214531	0.262304	0.265901	0.23144	0.232402	0.168396	0.23696	0.215227	0.19424	0.181977	0.244755	0.168628	0.208622	0.191381	0.1427	0.143456	0.148473
chr3	0.282575	0.28279	1	0.257209	0.184913	0.159767	0.225359	0.229099	0.218178	0.231414	0.1761	0.220998	0.208964	0.163042	0.174445	0.208943	0.172817	0.16828	0.161226	0.135856	0.140782	0.136755
chr4	0.244754	0.258143	0.257209	1	0.217728	0.195313	0.222526	0.218115	0.201837	0.224583	0.183114	0.217361	0.198514	0.170609	0.172478	0.206698	0.150675	0.17415	0.159943	0.136324	0.142518	0.131232
chr5	0.218342	0.218867	0.184913	0.217728	1	0.177469	0.204486	0.190307	0.204942	0.190136	0.133928	0.153083	0.19303	0.147229	0.154384	0.175063	0.156463	0.177385	0.145912	0.156091	0.113259	0.132582
chr6	0.213974	0.214531	0.159767	0.195313	0.177469	1	0.17621	0.168958	0.168253	0.178105	0.126203	0.16468	0.153068	0.151726	0.1324	0.159461	0.13711	0.151123	0.122907	0.139406	0.107497	0.121594
chr7	0.249762	0.262304	0.225359	0.222526	0.204486	0.17621	1	0.198181	0.204869	0.20231	0.153804	0.185924	0.176085	0.15047	0.173122	0.190497	0.157972	0.163788	0.161159	0.13365	0.147057	0.135395
chr8	0.242009	0.265901	0.229099	0.218115	0.190307	0.168958	0.198181	1	0.209726	0.198259	0.125317	0.215285	0.180706	0.156707	0.17067	0.214493	0.157805	0.155149	0.136733	0.126902	0.111116	0.150286
chr9	0.236018	0.23144	0.218178	0.201837	0.204942	0.168253	0.204869	0.209726	1	0.194428	0.166275	0.202635	0.153461	0.154588	0.181975	0.179865	0.149572	0.15947	0.134754	0.15962	0.130601	0.125002
chr10	0.232877	0.232402	0.231414	0.224583	0.190136	0.178105	0.20231	0.198259	0.194428	1	0.12346	0.2033	0.182041	0.145451	0.170915	0.200433	0.13764	0.159506	0.133226	0.14614	0.149855	0.101264
chr11	0.173584	0.168396	0.1761	0.183114	0.133928	0.126203	0.153804	0.125317	0.166275	0.12346	1	0.16512	0.146984	0.181432	0.14358	0.151604	0.107715	0.140492	0.129041	0.111927	0.104267	0.102315
chr12	0.249844	0.23696	0.220998	0.217361	0.153083	0.16468	0.185924	0.215285	0.202635	0.2033	0.16512	1	0.184605	0.147479	0.176913	0.198498	0.125194	0.157802	0.143163	0.179036	0.111806	0.126478
chr13	0.223406	0.215227	0.208964	0.198514	0.19303	0.153068	0.176085	0.180706	0.153461	0.182041	0.146984	0.184605	1	0.127678	0.132663	0.20912	0.130647	0.14957	0.133847	0.0747607	0.131427	0.0955196
chr14	0.186299	0.19424	0.163042	0.170609	0.147229	0.151726	0.15047	0.156707	0.154588	0.145451	0.181432	0.147479	0.127678	1	0.107829	0.12487	0.152394	0.129418	0.122831	0.128255	0.167364	0.103414
chr15	0.194459	0.181977	0.174445	0.172478	0.154384	0.1324	0.173122	0.17067	0.181975	0.170915	0.14358	0.176913	0.132663	0.107829	1	0.152127	0.136355	0.1488	0.132642	0.13196	0.0972877	0.115618
chr16	0.230181	0.244755	0.208943	0.206698	0.175063	0.159461	0.190497	0.214493	0.179865	0.200433	0.151604	0.198498	0.20912	0.12487	0.152127	1	0.124593	0.171926	0.14939	0.11587	0.122709	0.119919
chr17	0.16263	0.168628	0.172817	0.150675	0.156463	0.13711	0.157972	0.157805	0.149572	0.13764	0.107715	0.125194	0.130647	0.152394	0.136355	0.124593	1	0.119987	0.109826	0.124203	0.100078	0.111613
chr18	0.194935	0.208622	0.16828	0.17415	0.177385	0.151123	0.163788	0.155149	0.15947	0.159506	0.140492	0.157802	0.14957	0.129418	0.1488	0.171926	0.119987	1	0.146535	0.112736	0.0951755	0.115983
chr19	0.187102	0.191381	0.161226	0.159943	0.145912	0.122907	0.161159	0.136733	0.134754	0.133226	0.129041	0.143163	0.133847	0.122831	0.132642	0.14939	0.109826	0.146535	1	0.128924	0.119524	0.109449
chr20	0.162935	0.1427	0.135856	0.136324	0.156091	0.139406	0.13365	0.126902	0.15962	0.14614	0.111927	0.179036	0.0747607	0.128255	0.13196	0.11587	0.124203	0.112736	0.128924	1	0.0851139	0.102532
chr21	0.161582	0.143456	0.140782	0.142518	0.113259	0.107497	0.147057	0.111116	0.130601	0.149855	0.104267	0.111806	0.131427	0.167364	0.0972877	0.122709	0.100078	0.0951755	0.119524	0.0851139	1	0.0865
chr22	0.172441	0.148473	0.136755	0.131232	0.132582	0.121594	0.135395	0.150286	0.125002	0.101264	0.102315	0.126478	0.0955196	0.103414	0.115618	0.119919	0.111613	0.115983	0.109449	0.102532	0.0865	1
raw result:
Tagi	SNPi	Tagj	SNPj	rsq	sd	pval	rsq_s	sd_s	pval_s
10	152198	10	152198	0.000764703	1.47253e-05	4.11463e-07	1	0	0
11	151748	10	152198	0.000117092	1.35011e-05	0.000486342	0.12346	0.0919395	0.12523
11	151748	11	151748	0.00119304	2.47451e-05	5.53616e-07	1	0	0
12	139677	10	152198	0.000149927	1.00775e-05	5.9434e-05	0.2033	0.13907	0.108796
12	139677	11	151748	0.000152333	1.30629e-05	0.000154561	0.16512	0.125863	0.129888
12	139677	12	139677	0.000724517	1.37852e-05	3.92226e-07	1	0	0
13	113386	10	152198	0.000154195	1.18878e-05	0.000101913	0.182041	0.113858	0.0925509
13	113386	11	151748	0.000155749	1.54087e-05	0.000269572	0.146984	0.110183	0.126544
13	113386	12	139677	0.000152104	1.15015e-05	9.44472e-05	0.184605	0.125551	0.107708
13	113386	13	113386	0.00095517	1.91807e-05	4.8651e-07	1	0	0
14	97333	10	152198	0.000127716	1.23955e-05	0.000250266	0.145451	0.240603	0.289054
14	97333	11	151748	0.000199294	1.61026e-05	0.00012248	0.181432	0.0452909	0.00802547
14	97333	12	139677	0.000125967	1.19937e-05	0.000232331	0.147479	0.19135	0.241932
14	97333	13	113386	0.000125256	1.41472e-05	0.000449319	0.127678	0.181457	0.260233
14	97333	14	97333	0.00102724	2.08665e-05	5.09384e-07	1	0	0
15	85305	10	152198	0.000143134	1.17504e-05	0.000130346	0.170915	0.253355	0.268454
15	85305	11	151748	0.000150421	1.52334e-05	0.00029509	0.14358	0.143719	0.187159
15	85305	12	139677	0.000144118	1.13694e-05	0.000111529	0.176913	0.225695	0.238468
15	85305	13	113386	0.000124127	1.34112e-05	0.000378839	0.132663	0.160516	0.227491
15	85305	14	97333	0.000104588	1.3996e-05	0.000857162	0.107829	0.0491895	0.0467351
15	85305	15	85305	0.000936786	1.87507e-05	4.80251e-07	1	0	0
16	91972	10	152198	0.000155455	1.07402e-05	6.62299e-05	0.200433	0.10617	0.0660383
16	91972	11	151748	0.000147095	1.39173e-05	0.000226708	0.151604	0.177451	0.220531
16	91972	12	139677	0.000149756	1.03894e-05	6.73189e-05	0.198498	0.141642	0.116855
16	91972	13	113386	0.00018121	1.22754e-05	6.12862e-05	0.20912	0.0554804	0.00980853
16	91972	14	97333	0.000112169	1.27845e-05	0.000465232	0.12487	0.0691975	0.0727336
16	91972	15	85305	0.000130333	1.21139e-05	0.000211563	0.152127	0.377967	0.353953
16	91972	16	91972	0.000804312	1.56518e-05	4.29128e-07	1	0	0
17	79445	10	152198	0.000125808	1.29884e-05	0.000317879	0.13764	0.190132	0.254594
17	79445	11	151748	0.000123166	1.6837e-05	0.000928879	0.107715	0.150576	0.256963
17	79445	12	139677	0.000111312	1.25723e-05	0.000449314	0.125194	0.0657682	0.0648527
17	79445	13	113386	0.000133418	1.48226e-05	0.000421735	0.130647	1.08195	0.454855
17	79445	14	97333	0.000161329	1.54663e-05	0.000238594	0.152394	0.0901275	0.0830611
17	79445	15	85305	0.000137673	1.46555e-05	0.00035778	0.136355	0.810809	0.437305
17	79445	16	91972	0.000116504	1.33934e-05	0.000480828	0.124593	0.0891439	0.117375
17	79445	17	79445	0.00111457	2.29093e-05	5.33982e-07	1	0	0
18	87102	10	152198	0.0001352	1.19123e-05	0.00017181	0.159506	235.847	0.499746
18	87102	11	151748	0.000148972	1.54439e-05	0.000323024	0.140492	0.157591	0.211522
18	87102	12	139677	0.00013011	1.15261e-05	0.000175481	0.157802	0.356704	0.340538
18	87102	13	113386	0.000141644	1.3596e-05	0.000239746	0.14957	0.315932	0.330296
18	87102	14	97333	0.000127051	1.41811e-05	0.000429349	0.129418	0.224955	0.297948
18	87102	15	85305	0.000139322	1.34425e-05	0.000244612	0.1488	0.48626	0.387432
18	87102	16	91972	0.000149083	1.22835e-05	0.000132221	0.171926	0.152133	0.160804
18	87102	17	79445	0.000122617	1.48598e-05	0.000588312	0.119987	0.141559	0.222198
18	87102	18	87102	0.000959133	1.92734e-05	4.87835e-07	1	0	0
19	72787	10	152198	0.000122178	1.30453e-05	0.000361963	0.133226	0.133325	0.18711
19	72787	11	151748	0.000148042	1.691e-05	0.000469127	0.129041	0.169987	0.245026
19	72787	12	139677	0.000127711	1.2621e-05	0.000268418	0.143163	0.240984	0.292215
19	72787	13	113386	0.00013714	1.48867e-05	0.000385728	0.133847	1.03119	0.451496
19	72787	14	97333	0.000130464	1.55272e-05	0.000549035	0.122831	0.401986	0.387591
19	72787	15	85305	0.000134369	1.47188e-05	0.000399439	0.132642	2.32647	0.478634
19	72787	16	91972	0.000140156	1.34479e-05	0.000239386	0.14939	0.40603	0.365784
19	72787	17	79445	0.00012143	1.6271e-05	0.000861384	0.109826	0.129656	0.222334
19	72787	18	87102	0.000150244	1.49246e-05	0.000273847	0.146535	0.145393	0.185271
19	72787	19	72787	0.00112305	2.31078e-05	5.3621e-07	1	0	0
1	225959	10	152198	0.000144131	8.03221e-06	2.83461e-05	0.232877	0.20953	0.164342
1	225959	11	151748	0.000134398	1.04106e-05	0.000103819	0.173584	2.22922	0.470836
1	225959	12	139677	0.000150416	7.77436e-06	2.10334e-05	0.249844	0.127524	0.0608338
1	225959	13	113386	0.000154482	9.17117e-06	3.64056e-05	0.223406	0.10611	0.0515105
1	225959	14	97333	0.000133543	9.55996e-06	7.61672e-05	0.186299	1.06952	0.435088
1	225959	15	85305	0.000132945	9.06237e-06	6.28156e-05	0.194459	0.778583	0.407538
1	225959	16	91972	0.000145742	8.28149e-06	3.06145e-05	0.230181	0.180849	0.136021
1	225959	17	79445	0.000121351	1.00196e-05	0.000133307	0.16263	0.117503	0.119278
1	225959	18	87102	0.000134888	9.18775e-06	6.26252e-05	0.194935	5.59477	0.486937
1	225959	19	72787	0.000140076	1.00606e-05	7.71554e-05	0.187102	0.386648	0.326875
1	225959	1	225959	0.000509679	8.7597e-06	2.61238e-07	1	0	0
20	68806	10	152198	0.000147181	1.44801e-05	0.000263804	0.14614	0.176692	0.227336
20	68806	11	151748	0.000141016	1.87693e-05	0.000839869	0.111927	0.361677	0.386209
20	68806	12	139677	0.000175395	1.40247e-05	0.000117582	0.179036	0.0622705	0.0226172
20	68806	13	113386	8.4122e-05	1.65462e-05	0.00353033	0.0747607	0.0241193	0.0181172
20	68806	14	97333	0.000149602	1.72372e-05	0.000484998	0.128255	0.153545	0.22527
20	68806	15	85305	0.000146804	1.63395e-05	0.000424694	0.13196	0.1859	0.258495
20	68806	16	91972	0.000119382	1.49296e-05	0.000663104	0.11587	0.109256	0.174346
20	68806	17	79445	0.000150809	1.80613e-05	0.000562315	0.124203	0.143744	0.218147
20	68806	18	87102	0.00012694	1.65651e-05	0.000779362	0.112736	0.225838	0.321926
20	68806	19	72787	0.000157062	1.81411e-05	0.000489578	0.128924	0.106957	0.147243
20	68806	1	225959	0.000133961	1.11672e-05	0.000138399	0.162935	1.45861	0.458219
20	68806	20	68806	0.0013524	2.84727e-05	5.87677e-07	1	0	0
21	44960	10	152198	0.000165773	1.6087e-05	0.00025014	0.149855	0.0787563	0.0649121
21	44960	11	151748	0.000144292	2.08441e-05	0.00114277	0.104267	0.239236	0.342723
21	44960	12	139677	0.000120311	1.55593e-05	0.000753232	0.111806	0.116729	0.196195
21	44960	13	113386	0.000162435	1.83566e-05	0.000450263	0.131427	0.0885281	0.105913
21	44960	14	97333	0.00021443	1.91853e-05	0.0001824	0.167364	0.0402468	0.00708145
21	44960	15	85305	0.000118882	1.81462e-05	0.00140342	0.0972877	0.108094	0.209495
21	44960	16	91972	0.000138869	1.65773e-05	0.000555371	0.122709	0.555658	0.418017
21	44960	17	79445	0.000133473	2.00556e-05	0.00132369	0.100078	1.15696	0.467613
21	44960	18	87102	0.000117712	1.83976e-05	0.00153206	0.0951755	0.100041	0.197647
21	44960	19	72787	0.000159938	2.01464e-05	0.000681556	0.119524	0.0973095	0.143334
21	44960	1	225959	0.00014592	1.24027e-05	0.000149312	0.161582	0.187026	0.218172
21	44960	20	68806	0.000125077	2.23591e-05	0.00250578	0.0851139	0.187826	0.336966
21	44960	21	44960	0.00163633	3.51145e-05	6.34241e-07	1	0	0
22	40361	10	152198	0.000107122	1.53429e-05	0.00110677	0.101264	0.0552419	0.0703593
22	40361	11	151748	0.000135398	1.98801e-05	0.00121443	0.102315	10.705	0.496416
22	40361	12	139677	0.000130146	1.48385e-05	0.000465831	0.126478	0.3707	0.375066
22	40361	13	113386	0.000112893	1.75067e-05	0.00148821	0.0955196	0.0748869	0.135583
22	40361	14	97333	0.000126701	1.82563e-05	0.0011319	0.103414	0.221906	0.332722
22	40361	15	85305	0.000135102	1.73055e-05	0.000726338	0.115618	18.8093	0.497695
22	40361	16	91972	0.000129776	1.58112e-05	0.000600341	0.119919	0.349045	0.374236
22	40361	17	79445	0.000142347	1.91289e-05	0.000870812	0.111613	0.299038	0.363954
22	40361	18	87102	0.000137173	1.75451e-05	0.000722323	0.115983	1.03589	0.458122
22	40361	19	72787	0.000140052	1.92114e-05	0.000941008	0.109449	0.434106	0.406685
22	40361	1	225959	0.000148917	1.18304e-05	0.000114628	0.172441	0.148735	0.155397
22	40361	20	68806	0.000144084	2.13255e-05	0.00125127	0.102532	0.246334	0.349302
22	40361	21	44960	0.000133515	2.3682e-05	0.00243592	0.0865	1.21002	0.473221
22	40361	22	40361	0.00150076	3.19433e-05	6.13881e-07	1	0	0
2	241226	10	152198	0.000142083	7.89619e-06	2.80372e-05	0.232402	0.266857	0.216481
2	241226	11	151748	0.000128791	1.02355e-05	0.0001148	0.168396	0.268555	0.282321
2	241226	12	139677	0.00014092	7.63978e-06	2.54153e-05	0.23696	0.316882	0.248077
2	241226	13	113386	0.000147012	9.01312e-06	4.13437e-05	0.215227	0.164233	0.130104
2	241226	14	97333	0.000137537	9.39872e-06	6.34335e-05	0.19424	0.783929	0.408253
2	241226	15	85305	0.000122894	8.91174e-06	8.01263e-05	0.181977	0.131592	0.119443
2	241226	16	91972	0.00015308	8.14534e-06	2.36012e-05	0.244755	0.111332	0.0464082
2	241226	17	79445	0.000124293	9.84962e-06	0.000113514	0.168628	0.152087	0.164852
2	241226	18	87102	0.000142598	9.03358e-06	4.70518e-05	0.208622	0.254959	0.229577
2	241226	19	72787	0.000141532	9.89109e-06	6.92889e-05	0.191381	0.29927	0.278645
2	241226	1	225959	0.000149425	6.09409e-06	8.20859e-06	0.299391	0.128053	0.0397751
2	241226	20	68806	0.000115894	1.09834e-05	0.000228176	0.1427	0.081045	0.0765413
2	241226	21	44960	0.000127971	1.21928e-05	0.000232946	0.143456	0.24166	0.292352
2	241226	22	40361	0.000126654	1.16295e-05	0.000201775	0.148473	0.201813	0.251363
2	241226	2	241226	0.000497151	8.46664e-06	2.51868e-07	1	0	0
3	212657	10	152198	0.00015918	9.22856e-06	3.31462e-05	0.231414	0.0888425	0.0298738
3	212657	11	151748	0.000151534	1.19552e-05	0.000111555	0.1761	0.128855	0.121755
3	212657	12	139677	0.000147871	8.92334e-06	3.88357e-05	0.220998	0.155609	0.114286
3	212657	13	113386	0.000160592	1.05312e-05	5.39253e-05	0.208964	0.0864886	0.0365359
3	212657	14	97333	0.000129891	1.09759e-05	0.00014594	0.163042	0.336491	0.326671
3	212657	15	85305	0.000132547	1.04043e-05	0.000109361	0.174445	0.682008	0.405367
3	212657	16	91972	0.000147032	9.50769e-06	5.10227e-05	0.208943	0.167908	0.140645
3	212657	17	79445	0.000143317	1.1501e-05	0.000119248	0.172817	0.245049	0.259783
3	212657	18	87102	0.000129415	1.05487e-05	0.000126759	0.16828	0.30638	0.306027
3	212657	19	72787	0.00013415	1.155e-05	0.000157009	0.161226	1.75892	0.465687
3	212657	1	225959	0.000158677	7.12183e-06	1.20122e-05	0.282575	0.0853674	0.0148257
3	212657	20	68806	0.00012414	1.28221e-05	0.000318444	0.135856	0.157342	0.218296
3	212657	21	44960	0.000141299	1.42382e-05	0.000289429	0.140782	0.329067	0.345404
3	212657	22	40361	0.000131255	1.35799e-05	0.000320531	0.136755	0.469734	0.392711
3	212657	2	241226	0.000156861	7.00044e-06	1.17441e-05	0.28279	0.0910687	0.0180189
3	212657	3	212657	0.000628791	1.1546e-05	3.40287e-07	1	0	0
4	222221	10	152198	0.000150287	8.90389e-06	3.61126e-05	0.224583	0.132458	0.0826111
4	222221	11	151748	0.000153292	1.15416e-05	9.28703e-05	0.183114	0.116752	0.0959312
4	222221	12	139677	0.000141489	8.61224e-06	4.01837e-05	0.217361	0.298003	0.253088
4	222221	13	113386	0.000148419	1.01604e-05	6.38789e-05	0.198514	0.152571	0.131551
4	222221	14	97333	0.000132229	1.05951e-05	0.000118544	0.170609	0.606684	0.396246
4	222221	15	85305	0.000127494	1.00443e-05	0.000110938	0.172478	0.224533	0.242615
4	222221	16	91972	0.000141503	9.17673e-06	5.16099e-05	0.206698	0.301283	0.265188
4	222221	17	79445	0.000121563	1.11038e-05	0.000197711	0.150675	0.122536	0.143106
4	222221	18	87102	0.000130293	1.01829e-05	0.000107508	0.17415	0.360748	0.327253
4	222221	19	72787	0.000129469	1.11499e-05	0.000157172	0.159943	0.310699	0.316921
4	222221	1	225959	0.000133708	6.86476e-06	2.04835e-05	0.244754	1.11963	0.41883
4	222221	20	68806	0.000121186	1.23785e-05	0.00030505	0.136324	0.120276	0.160182
4	222221	21	44960	0.000139158	1.37444e-05	0.000267832	0.142518	0.495903	0.394044
4	222221	22	40361	0.000122534	1.31106e-05	0.000364873	0.131232	0.135704	0.19414
4	222221	2	241226	0.000139302	6.74924e-06	1.6276e-05	0.258143	0.425538	0.288422
4	222221	3	212657	0.000156164	7.88884e-06	1.92086e-05	0.257209	0.0965454	0.0280741
4	222221	4	222221	0.000595162	1.07593e-05	3.19725e-07	1	0	0
5	193607	10	152198	0.000136891	9.76511e-06	7.51179e-05	0.190136	1.10359	0.435788
5	193607	11	151748	0.000120624	1.2661e-05	0.000338848	0.133928	0.116206	0.156651
5	193607	12	139677	0.000107209	9.45958e-06	0.000172769	0.153083	0.051534	0.0205614
5	193607	13	113386	0.000155271	1.11498e-05	7.70996e-05	0.19303	0.107135	0.07297
5	193607	14	97333	0.000122768	1.16262e-05	0.000227508	0.147229	0.137531	0.172341
5	193607	15	85305	0.00012278	1.10212e-05	0.000184735	0.154384	0.13683	0.161145
5	193607	16	91972	0.000128941	1.00681e-05	0.000107129	0.175063	0.28117	0.283635
5	193607	17	79445	0.000135812	1.21801e-05	0.000184091	0.156463	3.15644	0.481421
5	193607	18	87102	0.000142784	1.11725e-05	0.000108014	0.177385	0.261541	0.267417
5	193607	19	72787	0.000127074	1.22335e-05	0.000242506	0.145912	0.219404	0.271204
5	193607	1	225959	0.00012833	7.53248e-06	3.48052e-05	0.218342	0.239043	0.206354
5	193607	20	68806	0.000149287	1.35807e-05	0.000194595	0.156091	0.150502	0.179126
5	193607	21	44960	0.00011898	1.50819e-05	0.000698066	0.113259	0.105211	0.171152
5	193607	22	40361	0.000133188	1.43825e-05	0.000378065	0.132582	0.944006	0.447548
5	193607	2	241226	0.00012707	7.40578e-06	3.38426e-05	0.218867	0.199066	0.166645
5	193607	3	212657	0.000120789	8.65017e-06	7.62784e-05	0.184913	0.110806	0.0852399
5	193607	4	222221	0.000138363	8.34727e-06	3.87931e-05	0.217728	0.576043	0.362327
5	193607	5	193607	0.000688872	1.29514e-05	3.7395e-07	1	0	0
6	206161	10	152198	0.000148382	1.16306e-05	0.00010875	0.178105	0.157164	0.160216
6	206161	11	151748	0.000131531	1.50745e-05	0.000475202	0.126203	0.51728	0.409627
6	206161	12	139677	0.000133456	1.12513e-05	0.000144635	0.16468	1.05755	0.441899
6	206161	13	113386	0.000142476	1.32722e-05	0.000213411	0.153068	0.279498	0.306528
6	206161	14	97333	0.000146401	1.38439e-05	0.000226216	0.151726	0.187618	0.232023
6	206161	15	85305	0.000121844	1.31239e-05	0.00037436	0.1324	0.129969	0.182972
6	206161	16	91972	0.000135907	1.19888e-05	0.000172607	0.159461	2.73524	0.478153
6	206161	17	79445	0.000137717	1.45045e-05	0.000343341	0.13711	0.792689	0.435538
6	206161	18	87102	0.000140763	1.33041e-05	0.000225773	0.151123	0.361927	0.348857
6	206161	19	72787	0.000123862	1.45683e-05	0.000524784	0.122907	0.157768	0.239737
6	206161	1	225959	0.000145528	8.97051e-06	4.22361e-05	0.213974	0.185899	0.156923
6	206161	20	68806	0.000154284	1.6173e-05	0.000337162	0.139406	0.118125	0.151664
6	206161	21	44960	0.000130676	1.79573e-05	0.000947365	0.107497	0.425889	0.406583
6	206161	22	40361	0.000141348	1.71274e-05	0.000587998	0.121594	0.339201	0.369054
6	206161	2	241226	0.000144127	8.81882e-06	4.10218e-05	0.214531	0.21203	0.184433
6	206161	3	212657	0.000120765	1.02997e-05	0.000151317	0.159767	0.113843	0.11658
6	206161	4	222221	0.000143626	9.94098e-06	6.67061e-05	0.195313	0.230598	0.222352
6	206161	5	193607	0.000140406	1.0906e-05	0.000104947	0.177469	0.372304	0.329233
6	206161	6	206161	0.000920347	1.83661e-05	4.74497e-07	1	0	0
7	177385	10	152198	0.000146178	9.81406e-06	5.91635e-05	0.20231	0.180909	0.163032
7	177385	11	151748	0.000139022	1.27202e-05	0.000199023	0.153804	0.513013	0.38963
7	177385	12	139677	0.000130675	9.49431e-06	8.07362e-05	0.185924	0.389399	0.328975
7	177385	13	113386	0.000142147	1.11995e-05	0.000110968	0.176085	0.284149	0.284508
7	177385	14	97333	0.00012592	1.16817e-05	0.000210016	0.15047	0.189187	0.235469
7	177385	15	85305	0.000138175	1.10728e-05	0.000118594	0.173122	0.646192	0.401008
7	177385	16	91972	0.000140811	1.01168e-05	7.72599e-05	0.190497	0.343957	0.304595
7	177385	17	79445	0.000137613	1.22392e-05	0.00017821	0.157972	0.804153	0.426919
7	177385	18	87102	0.000132312	1.1226e-05	0.000148276	0.163788	0.634823	0.404566
7	177385	19	72787	0.000140855	1.22923e-05	0.000165514	0.161159	0.350791	0.334897
7	177385	1	225959	0.000147323	7.57077e-06	2.05583e-05	0.249762	0.155914	0.092215
7	177385	20	68806	0.000128282	1.3645e-05	0.000356681	0.13365	0.263273	0.319206
7	177385	21	44960	0.00015504	1.51561e-05	0.00025735	0.147057	0.112307	0.13027
7	177385	22	40361	0.000136501	1.44522e-05	0.000350373	0.135395	1.51322	0.466503
7	177385	2	241226	0.000152834	7.44615e-06	1.6639e-05	0.262304	0.110558	0.0383042
7	177385	3	212657	0.000147736	8.69125e-06	3.51192e-05	0.225359	0.156205	0.111286
7	177385	4	222221	0.000141919	8.38829e-06	3.57772e-05	0.222526	0.278084	0.234209
7	177385	5	193607	0.00014031	9.20279e-06	5.39629e-05	0.204486	0.368833	0.304416
7	177385	6	206161	0.00013991	1.09588e-05	0.000108449	0.17621	0.410702	0.344994
7	177385	7	177385	0.00069425	1.30772e-05	3.76785e-07	1	0	0
8	163436	10	152198	0.000146418	1.00848e-05	6.54342e-05	0.198259	0.178269	0.164208
8	163436	11	151748	0.000115777	1.30749e-05	0.000449087	0.125317	0.0842487	0.105552
8	163436	12	139677	0.000154658	9.76128e-06	4.63676e-05	0.215285	0.10787	0.0583384
8	163436	13	113386	0.000149104	1.15102e-05	0.000102431	0.180706	0.149589	0.146788
8	163436	14	97333	0.000134039	1.2003e-05	0.000183013	0.156707	1.60916	0.463553
8	163436	15	85305	0.000139231	1.13784e-05	0.000128057	0.17067	0.482731	0.370761
8	163436	16	91972	0.000162055	1.0405e-05	4.96135e-05	0.214493	0.0829046	0.0304306
8	163436	17	79445	0.000140507	1.25771e-05	0.000182726	0.157805	0.374525	0.347579
8	163436	18	87102	0.000128105	1.15363e-05	0.000187069	0.155149	0.251924	0.285653
8	163436	19	72787	0.00012215	1.2633e-05	0.000320054	0.136733	0.132222	0.179751
8	163436	1	225959	0.000145907	7.77895e-06	2.37858e-05	0.242009	0.17583	0.120364
8	163436	20	68806	0.000124499	1.40221e-05	0.000444467	0.126902	0.166126	0.243752
8	163436	21	44960	0.000119738	1.55728e-05	0.000769486	0.111116	0.111809	0.188285
8	163436	22	40361	0.000154865	1.48545e-05	0.00023909	0.150286	0.113489	0.128012
8	163436	2	241226	0.000158356	7.65532e-06	1.61323e-05	0.265901	0.087606	0.0192919
8	163436	3	212657	0.00015351	8.93365e-06	3.36471e-05	0.229099	0.111638	0.0547104
8	163436	4	222221	0.000142182	8.61976e-06	3.95512e-05	0.218115	0.269532	0.231883
8	163436	5	193607	0.000133469	9.45637e-06	7.31312e-05	0.190307	1.03461	0.431504
8	163436	6	206161	0.000137119	1.12609e-05	0.000130542	0.168958	0.995838	0.436755
8	163436	7	177385	0.000139489	9.50241e-06	6.26581e-05	0.198181	0.439881	0.337833
8	163436	8	163436	0.000725526	1.38088e-05	3.92726e-07	1	0	0
9	129411	10	152198	0.000143762	1.01126e-05	7.10888e-05	0.194428	0.229785	0.222564
9	129411	11	151748	0.000153803	1.31115e-05	0.000151049	0.166275	0.117146	0.114398
9	129411	12	139677	0.000145745	9.78509e-06	5.91651e-05	0.202635	0.188087	0.170982
9	129411	13	113386	0.000126776	1.15413e-05	0.000195147	0.153461	0.209998	0.25271
9	129411	14	97333	0.000132386	1.2037e-05	0.000194203	0.154588	0.659301	0.413065
9	129411	15	85305	0.000148632	1.14125e-05	0.000100303	0.181975	0.154624	0.152246
9	129411	16	91972	0.000136056	1.04249e-05	9.94792e-05	0.179865	2.21287	0.469561
9	129411	17	79445	0.000133337	1.26124e-05	0.000226479	0.149572	1.00835	0.444628
9	129411	18	87102	0.000131831	1.15684e-05	0.000169111	0.15947	0.54625	0.392425
9	129411	19	72787	0.000120526	1.26692e-05	0.000340764	0.134754	0.116216	0.155373
9	129411	1	225959	0.000142466	7.79983e-06	2.64232e-05	0.236018	0.253551	0.202312
9	129411	20	68806	0.000156786	1.40651e-05	0.000184294	0.15962	0.103943	0.099712
9	129411	21	44960	0.000140905	1.56149e-05	0.000417671	0.130601	0.357977	0.366854
9	129411	22	40361	0.000128966	1.48932e-05	0.000489244	0.125002	0.298197	0.348305
9	129411	2	241226	0.000137999	7.66747e-06	2.80117e-05	0.23144	0.635824	0.367141
9	129411	3	212657	0.000146368	8.95564e-06	4.10167e-05	0.218178	0.174974	0.140227
9	129411	4	222221	0.00013173	8.64353e-06	5.40491e-05	0.201837	0.501471	0.353952
9	129411	5	193607	0.000143905	9.48412e-06	5.49959e-05	0.204942	0.223409	0.205436
9	129411	6	206161	0.000136711	1.12927e-05	0.000133537	0.168253	1.26441	0.450282
9	129411	7	177385	0.00014437	9.53019e-06	5.53493e-05	0.204869	0.213037	0.195339
9	129411	8	163436	0.000151061	9.79542e-06	5.1586e-05	0.209726	0.129453	0.090264
9	129411	9	129411	0.000728866	1.3887e-05	3.94376e-07	1	0	0

## Sheet: CDX
unscale:	chr1	chr2	chr3	chr4	chr5	chr6	chr7	chr8	chr9	chr10	chr11	chr12	chr13	chr14	chr15	chr16	chr17	chr18	chr19	chr20	chr21	chr22
chr1	0.00052814	0.000137639	0.000135981	0.000134851	0.000124828	0.00011276	0.000135142	0.000139902	0.000138875	0.000138752	0.000136877	0.00015092	0.000142071	0.000133904	0.000133732	0.000151672	0.000132324	0.000155987	0.000132613	0.00012743	0.00012291	9.98885e-05
chr2	0.000137639	0.000571358	0.000135801	0.000145699	0.000160312	0.000121658	0.000140583	0.000118019	0.000161027	0.00015268	0.000142257	0.000139076	0.000165819	0.00012448	0.000127876	0.000134494	0.000156962	0.00015812	0.000143964	0.000113016	0.000143811	0.000128674
chr3	0.000135981	0.000135801	0.000664376	0.000135389	0.000128297	9.40398e-05	0.000127707	0.000135431	0.000128552	0.000147744	0.000172122	0.000148653	0.000178067	0.000147262	0.00012134	0.000169869	0.000143986	0.000161132	0.000158989	0.000147245	0.000118479	0.000132566
chr4	0.000134851	0.000145699	0.000135389	0.00068869	0.000151567	0.000132872	0.000133587	0.000121361	0.000134766	0.000136646	0.000115698	0.000123219	0.000179422	0.00013703	0.000171741	0.000113354	0.000147492	0.000138058	0.000150641	0.000150636	0.000142559	0.000113497
chr5	0.000124828	0.000160312	0.000128297	0.000151567	0.000789597	0.000117082	0.000130093	0.000120014	0.000157349	0.000134921	0.000148104	0.000134503	0.000156927	0.000129335	0.000120019	0.000132375	0.000140899	0.000154204	0.000162753	0.000121095	0.000140365	9.48642e-05
chr6	0.00011276	0.000121658	9.40398e-05	0.000132872	0.000117082	0.00109408	0.000119799	0.000119861	0.000134767	0.000141485	0.000111576	0.000151684	0.000155525	9.93755e-05	0.000128432	0.000109271	0.000138926	0.000133396	9.43188e-05	9.13801e-05	8.7971e-05	0.000101868
chr7	0.000135142	0.000140583	0.000127707	0.000133587	0.000130093	0.000119799	0.000773389	0.000127497	0.0001476	0.000116808	0.000108014	0.000124422	0.000144763	0.000114006	0.000154177	0.000128649	0.000128348	0.000128774	0.000124558	0.000122716	0.000114545	0.000113245
chr8	0.000139902	0.000118019	0.000135431	0.000121361	0.000120014	0.000119861	0.000127497	0.000774274	0.000138703	0.000147967	0.000143244	0.000126406	0.000153001	0.000140155	0.000147409	0.000150141	0.000126542	0.000135281	0.000123737	0.000132384	0.000136545	0.000139871
chr9	0.000138875	0.000161027	0.000128552	0.000134766	0.000157349	0.000134767	0.0001476	0.000138703	0.000850473	0.000161739	0.000135134	0.000163695	0.00014944	0.00013203	0.000156706	0.000156212	0.000150195	0.000185628	0.000181182	0.000118768	0.000146962	0.000114569
chr10	0.000138752	0.00015268	0.000147744	0.000136646	0.000134921	0.000141485	0.000116808	0.000147967	0.000161739	0.000943738	0.000129275	0.000158022	0.00014037	0.000121304	0.000124261	0.000179979	0.000124005	0.000159186	0.000152395	0.0001167	0.000136143	0.000146375
chr11	0.000136877	0.000142257	0.000172122	0.000115698	0.000148104	0.000111576	0.000108014	0.000143244	0.000135134	0.000129275	0.00155236	0.000135208	0.00015195	0.000132488	0.000100999	0.000129812	0.000179906	0.000170282	0.000209455	0.000109038	0.000122723	0.000126103
chr12	0.00015092	0.000139076	0.000148653	0.000123219	0.000134503	0.000151684	0.000124422	0.000126406	0.000163695	0.000158022	0.000135208	0.000906344	0.000176544	0.000141461	0.000124084	0.000176313	0.000139569	0.000180902	0.00015885	0.000117534	0.000111463	0.000136854
chr13	0.000142071	0.000165819	0.000178067	0.000179422	0.000156927	0.000155525	0.000144763	0.000153001	0.00014944	0.00014037	0.00015195	0.000176544	0.00117987	0.000133397	0.000154939	0.000168743	0.000167266	0.000171268	0.000204863	0.000153441	0.000110222	0.000115234
chr14	0.000133904	0.00012448	0.000147262	0.00013703	0.000129335	9.93755e-05	0.000114006	0.000140155	0.00013203	0.000121304	0.000132488	0.000141461	0.000133397	0.00115355	0.000158516	0.000132849	0.000150672	0.000124593	0.000135815	0.000119728	0.000106	0.00016764
chr15	0.000133732	0.000127876	0.00012134	0.000171741	0.000120019	0.000128432	0.000154177	0.000147409	0.000156706	0.000124261	0.000100999	0.000124084	0.000154939	0.000158516	0.00112534	0.000139281	0.000161094	0.000144887	0.000152375	0.000115155	0.000116549	0.000127368
chr16	0.000151672	0.000134494	0.000169869	0.000113354	0.000132375	0.000109271	0.000128649	0.000150141	0.000156212	0.000179979	0.000129812	0.000176313	0.000168743	0.000132849	0.000139281	0.000948314	0.000160377	0.00017759	0.000158961	0.000132313	0.000125579	0.000142591
chr17	0.000132324	0.000156962	0.000143986	0.000147492	0.000140899	0.000138926	0.000128348	0.000126542	0.000150195	0.000124005	0.000179906	0.000139569	0.000167266	0.000150672	0.000161094	0.000160377	0.0012073	0.000138878	0.000163164	0.000151891	0.0001468	0.000121354
chr18	0.000155987	0.00015812	0.000161132	0.000138058	0.000154204	0.000133396	0.000128774	0.000135281	0.000185628	0.000159186	0.000170282	0.000180902	0.000171268	0.000124593	0.000144887	0.00017759	0.000138878	0.00106866	0.000145389	0.000138133	0.00013262	0.000114936
chr19	0.000132613	0.000143964	0.000158989	0.000150641	0.000162753	9.43188e-05	0.000124558	0.000123737	0.000181182	0.000152395	0.000209455	0.00015885	0.000204863	0.000135815	0.000152375	0.000158961	0.000163164	0.000145389	0.00131229	0.000109901	0.000117138	0.000116418
chr20	0.00012743	0.000113016	0.000147245	0.000150636	0.000121095	9.13801e-05	0.000122716	0.000132384	0.000118768	0.0001167	0.000109038	0.000117534	0.000153441	0.000119728	0.000115155	0.000132313	0.000151891	0.000138133	0.000109901	0.00163389	0.000147766	0.000129646
chr21	0.00012291	0.000143811	0.000118479	0.000142559	0.000140365	8.7971e-05	0.000114545	0.000136545	0.000146962	0.000136143	0.000122723	0.000111463	0.000110222	0.000106	0.000116549	0.000125579	0.0001468	0.00013262	0.000117138	0.000147766	0.00178639	0.000117956
chr22	9.98885e-05	0.000128674	0.000132566	0.000113497	9.48642e-05	0.000101868	0.000113245	0.000139871	0.000114569	0.000146375	0.000126103	0.000136854	0.000115234	0.00016764	0.000127368	0.000142591	0.000121354	0.000114936	0.000116418	0.000129646	0.000117956	0.00169944
scale:	chr1	chr2	chr3	chr4	chr5	chr6	chr7	chr8	chr9	chr10	chr11	chr12	chr13	chr14	chr15	chr16	chr17	chr18	chr19	chr20	chr21	chr22
chr1	1	0.252534	0.231347	0.225277	0.194754	0.149295	0.213123	0.220572	0.209038	0.198053	0.152127	0.219923	0.181412	0.173049	0.175113	0.216462	0.167284	0.209636	0.160808	0.138372	0.12787	0.106659
chr2	0.252534	1	0.222005	0.23388	0.240333	0.154777	0.213034	0.178794	0.232903	0.20941	0.151924	0.194739	0.203456	0.154579	0.160895	0.184439	0.190672	0.204191	0.167745	0.117922	0.143762	0.132022
chr3	0.231347	0.222005	1	0.201525	0.17835	0.110939	0.179448	0.190252	0.172411	0.187903	0.17045	0.193012	0.202595	0.16957	0.141569	0.216011	0.162188	0.192948	0.171779	0.142463	0.109826	0.126124
chr4	0.225277	0.23388	0.201525	1	0.206888	0.153915	0.184316	0.167404	0.177476	0.170646	0.112502	0.157095	0.200446	0.154935	0.19675	0.141539	0.163134	0.16233	0.159816	0.143109	0.129758	0.10603
chr5	0.194754	0.240333	0.17835	0.206888	1	0.126663	0.167634	0.154606	0.193524	0.157359	0.134498	0.16015	0.16373	0.136572	0.12841	0.154367	0.145544	0.169333	0.161257	0.107442	0.119319	0.0827666
chr6	0.149295	0.154777	0.110939	0.153915	0.126663	1	0.131002	0.131036	0.14066	0.140035	0.0859877	0.153268	0.137705	0.0890514	0.116611	0.108135	0.121783	0.12431	0.0793059	0.0688045	0.0634608	0.0754241
chr7	0.213123	0.213034	0.179448	0.184316	0.167634	0.131002	1	0.166021	0.183496	0.137705	0.0991506	0.149747	0.152671	0.121686	0.166739	0.151642	0.134012	0.142936	0.124746	0.110056	0.0984224	0.0998708
chr8	0.220572	0.178794	0.190252	0.167404	0.154606	0.131036	0.166021	1	0.17239	0.174393	0.131455	0.152096	0.161316	0.149557	0.159378	0.176929	0.132091	0.150119	0.123892	0.118696	0.117294	0.12332
chr9	0.209038	0.232903	0.172411	0.177476	0.193524	0.14066	0.183496	0.17239	1	0.181993	0.118397	0.188044	0.150427	0.134508	0.161757	0.175748	0.149682	0.196661	0.173194	0.101666	0.120527	0.096438
chr10	0.198053	0.20941	0.187903	0.170646	0.157359	0.140035	0.137705	0.174393	0.181993	1	0.107406	0.172139	0.133991	0.117189	0.121633	0.192016	0.117191	0.159926	0.138143	0.09473	0.10588	0.116839
chr11	0.152127	0.151924	0.17045	0.112502	0.134498	0.0859877	0.0991506	0.131455	0.118397	0.107406	1	0.114684	0.112938	0.0996614	0.0769793	0.107837	0.132384	0.133204	0.147837	0.0689177	0.0743156	0.078376
chr12	0.219923	0.194739	0.193012	0.157095	0.16015	0.153268	0.149747	0.152096	0.188044	0.172139	0.114684	1	0.172043	0.139519	0.123999	0.192037	0.134657	0.185542	0.147004	0.0974011	0.0884981	0.111523
chr13	0.181412	0.203456	0.202595	0.200446	0.16373	0.137705	0.152671	0.161316	0.150427	0.133991	0.112938	0.172043	1	0.115287	0.135675	0.161051	0.141411	0.153925	0.166128	0.111424	0.076684	0.0822851
chr14	0.173049	0.154579	0.16957	0.154935	0.136572	0.0890514	0.121686	0.149557	0.134508	0.117189	0.0996614	0.139519	0.115287	1	0.140483	0.128324	0.12892	0.113329	0.111465	0.0879922	0.0746376	0.121152
chr15	0.175113	0.160895	0.141569	0.19675	0.12841	0.116611	0.166739	0.159378	0.161757	0.121633	0.0769793	0.123999	0.135675	0.140483	1	0.136316	0.139661	0.133531	0.12671	0.0857509	0.0831508	0.0932658
chr16	0.216462	0.184439	0.216011	0.141539	0.154367	0.108135	0.151642	0.176929	0.175748	0.192016	0.107837	0.192037	0.161051	0.128324	0.136316	1	0.151542	0.178389	0.144073	0.107388	0.0976494	0.113801
chr17	0.167284	0.190672	0.162188	0.163134	0.145544	0.121783	0.134012	0.132091	0.149682	0.117191	0.132384	0.134657	0.141411	0.12892	0.139661	0.151542	1	0.123573	0.130996	0.1092	0.101116	0.0857925
chr18	0.209636	0.204191	0.192948	0.16233	0.169333	0.12431	0.142936	0.150119	0.196661	0.159926	0.133204	0.185542	0.153925	0.113329	0.133531	0.178389	0.123573	1	0.124086	0.105572	0.0971095	0.0863794
chr19	0.160808	0.167745	0.171779	0.159816	0.161257	0.0793059	0.124746	0.123892	0.173194	0.138143	0.147837	0.147004	0.166128	0.111465	0.12671	0.144073	0.130996	0.124086	1	0.0757875	0.0773916	0.0789443
chr20	0.138372	0.117922	0.142463	0.143109	0.107442	0.0688045	0.110056	0.118696	0.101666	0.09473	0.0689177	0.0974011	0.111424	0.0879922	0.0857509	0.107388	0.1092	0.105572	0.0757875	1	0.0874238	0.0787258
chr21	0.12787	0.143762	0.109826	0.129758	0.119319	0.0634608	0.0984224	0.117294	0.120527	0.10588	0.0743156	0.0884981	0.076684	0.0746376	0.0831508	0.0976494	0.101116	0.0971095	0.0773916	0.0874238	1	0.0686248
chr22	0.106659	0.132022	0.126124	0.10603	0.0827666	0.0754241	0.0998708	0.12332	0.096438	0.116839	0.078376	0.111523	0.0822851	0.121152	0.0932658	0.113801	0.0857925	0.0863794	0.0789443	0.0787258	0.0686248	1
raw result:
Tagi	SNPi	Tagj	SNPj	rsq	sd	pval	rsq_s	sd_s	pval_s
10	152193	10	152193	0.000943738	1.79055e-05	3.87811e-07	1	0	0
11	151749	10	152193	0.000129275	1.66782e-05	0.000746358	0.107406	0.131162	0.229418
11	151749	11	151749	0.00155236	3.10651e-05	4.79826e-07	1	0	0
12	139683	10	152193	0.000158022	1.23889e-05	0.000108843	0.172139	0.0500894	0.0131873
12	139683	11	151749	0.000135208	1.62988e-05	0.000576482	0.114684	0.095379	0.147759
12	139683	12	139683	0.000906344	1.7097e-05	3.78963e-07	1	0	0
13	113386	10	152193	0.00014037	1.43581e-05	0.000306702	0.133991	0.0776521	0.0797577
13	113386	11	151749	0.00015195	1.89137e-05	0.000651398	0.112938	0.0587202	0.0633934
13	113386	12	139683	0.000176544	1.40562e-05	0.000115626	0.172043	0.0394318	0.0060167
13	113386	13	113386	0.00117987	2.30111e-05	4.32949e-07	1	0	0
14	97335	10	152193	0.000121304	1.41748e-05	0.000511868	0.117189	0.292265	0.35447
14	97335	11	151749	0.000132488	1.86721e-05	0.00104173	0.0996614	0.110288	0.208641
14	97335	12	139683	0.000141461	1.38564e-05	0.000259359	0.139519	0.0747229	0.0676381
14	97335	13	113386	0.000133397	1.60711e-05	0.000575201	0.115287	0.104179	0.165263
14	97335	14	97335	0.00115355	2.2442e-05	4.28677e-07	1	0	0
15	85305	10	152193	0.000124261	1.39812e-05	0.000442768	0.121633	0.196791	0.284987
15	85305	11	151749	0.000100999	1.84163e-05	0.00269177	0.0769793	0.0969407	0.235798
15	85305	12	139683	0.000124084	1.36619e-05	0.000407382	0.123999	0.200133	0.28454
15	85305	13	113386	0.000154939	1.58604e-05	0.000307604	0.135675	0.054611	0.0339457
15	85305	14	97335	0.000158516	1.56655e-05	0.000268439	0.140483	0.0511695	0.0258076
15	85305	15	85305	0.00112534	2.18322e-05	4.23916e-07	1	0	0
16	91972	10	152193	0.000179979	1.27341e-05	7.27358e-05	0.192016	0.0376513	0.00349165
16	91972	11	151749	0.000129812	1.67243e-05	0.000742445	0.107837	0.12705	0.221909
16	91972	12	139683	0.000176313	1.24407e-05	7.19594e-05	0.192037	0.0390342	0.00396553
16	91972	13	113386	0.000168743	1.44156e-05	0.000152303	0.161051	0.0434949	0.0103927
16	91972	14	97335	0.000132849	1.42161e-05	0.000365054	0.128324	0.105829	0.146008
16	91972	15	85305	0.000139281	1.40239e-05	0.000288553	0.136316	0.0807142	0.0832563
16	91972	16	91972	0.000948314	1.80044e-05	3.88856e-07	1	0	0
17	79441	10	152193	0.000124005	1.45375e-05	0.00051826	0.117191	0.203166	0.297483
17	79441	11	151749	0.000179906	1.91729e-05	0.000359341	0.132384	0.0393274	0.0140713
17	79441	12	139683	0.000139569	1.42097e-05	0.000301208	0.134657	0.0798162	0.0834306
17	79441	13	113386	0.000167266	1.64986e-05	0.000266456	0.141411	0.0450197	0.0174056
17	79441	14	97335	0.000150672	1.62834e-05	0.000379221	0.12892	0.0597929	0.0486561
17	79441	15	85305	0.000161094	1.6067e-05	0.000278149	0.139661	0.0492067	0.0234755
17	79441	16	91972	0.000160377	1.45931e-05	0.000194781	0.151542	0.0492479	0.0185175
17	79441	17	79441	0.0012073	2.36043e-05	4.37234e-07	1	0	0
18	87102	10	152193	0.000159186	1.35988e-05	0.000152289	0.159926	0.0497404	0.0162139
18	87102	11	151749	0.000170282	1.791e-05	0.000341559	0.133204	0.0435023	0.0187924
18	87102	12	139683	0.000180902	1.33098e-05	8.48236e-05	0.185542	0.0375087	0.00388994
18	87102	13	113386	0.000171268	1.54212e-05	0.000186971	0.153925	0.0424613	0.0111284
18	87102	14	97335	0.000124593	1.52067e-05	0.000604427	0.113329	0.192047	0.293421
18	87102	15	85305	0.000144887	1.50047e-05	0.000321727	0.133531	0.0683691	0.0612611
18	87102	16	91972	0.00017759	1.36529e-05	0.000100793	0.178389	0.0390176	0.0051226
18	87102	17	79441	0.000138878	1.55989e-05	0.00043984	0.123573	0.0828154	0.104969
18	87102	18	87102	0.00106866	2.06065e-05	4.13722e-07	1	0	0
19	72788	10	152193	0.000152395	1.52303e-05	0.000280343	0.138143	0.0570948	0.0363996
19	72788	11	151749	0.000209455	2.00985e-05	0.000239451	0.147837	0.031423	0.00463781
19	72788	12	139683	0.00015885	1.4887e-05	0.000218467	0.147004	0.0504736	0.0217845
19	72788	13	113386	0.000204863	1.73078e-05	0.000145829	0.166128	0.0319178	0.00324724
19	72788	14	97335	0.000135815	1.7042e-05	0.000671647	0.111465	0.0940158	0.150699
19	72788	15	85305	0.000152375	1.68155e-05	0.000410996	0.12671	0.0578729	0.0468744
19	72788	16	91972	0.000158961	1.52763e-05	0.000240855	0.144073	0.0506385	0.0233124
19	72788	17	79441	0.000163164	1.749e-05	0.000367473	0.130996	0.0480648	0.0263462
19	72788	18	87102	0.000145389	1.63339e-05	0.000440218	0.124086	0.0680066	0.0710564
19	72788	19	72788	0.00131229	2.58742e-05	4.52223e-07	1	0	0
1	225945	10	152193	0.000138752	8.9431e-06	5.03708e-05	0.198053	0.0763899	0.0302569
1	225945	11	151749	0.000136877	1.17749e-05	0.000156496	0.152127	0.0841745	0.0725024
1	225945	12	139683	0.00015092	8.74868e-06	3.31316e-05	0.219923	0.0541949	0.00768696
1	225945	13	113386	0.000142071	1.01384e-05	7.52281e-05	0.181412	0.0693694	0.0295494
1	225945	14	97335	0.000133904	1.00082e-05	9.02327e-05	0.173049	0.0946134	0.0706953
1	225945	15	85305	0.000133732	9.87129e-06	8.59128e-05	0.175113	0.0953254	0.0700427
1	225945	16	91972	0.000151672	8.97769e-06	3.5982e-05	0.216462	0.0535991	0.00781143
1	225945	17	79441	0.000132324	1.02632e-05	0.00010435	0.167284	0.102691	0.0893225
1	225945	18	87102	0.000155987	9.60627e-06	4.20806e-05	0.209636	0.0495783	0.00669376
1	225945	19	72788	0.000132613	1.07452e-05	0.00012384	0.160808	0.101595	0.0943143
1	225945	1	225945	0.00052814	8.91948e-06	2.43589e-07	1	0	0
20	68796	10	152193	0.0001167	1.71435e-05	0.00121675	0.09473	1.50395	0.476399
20	68796	11	151749	0.000109038	2.25812e-05	0.00423461	0.0689177	0.236425	0.392581
20	68796	12	139683	0.000117534	1.6752e-05	0.00108665	0.0974011	0.852589	0.457275
20	68796	13	113386	0.000153441	1.94432e-05	0.00069713	0.111424	0.0572062	0.0616373
20	68796	14	97335	0.000119728	1.91928e-05	0.00168241	0.0879922	0.411149	0.420501
20	68796	15	85305	0.000115155	1.89302e-05	0.00184566	0.0857509	3.49016	0.490788
20	68796	16	91972	0.000132313	1.71927e-05	0.000766852	0.107388	0.110565	0.193207
20	68796	17	79441	0.000151891	1.96913e-05	0.000760206	0.1092	0.0592141	0.0694634
20	68796	18	87102	0.000138133	1.83943e-05	0.000841375	0.105572	0.0862123	0.143963
20	68796	19	72788	0.000109901	2.06084e-05	0.00297692	0.0757875	0.273096	0.397569
20	68796	1	225945	0.00012743	1.21011e-05	0.000229967	0.138372	0.14174	0.192112
20	68796	20	68796	0.00163389	3.28279e-05	4.87569e-07	1	0	0
21	44963	10	152193	0.000136143	1.79866e-05	0.000816618	0.10588	0.092753	0.158674
21	44963	11	151749	0.000122723	2.36882e-05	0.0033014	0.0743156	0.247841	0.389613
21	44963	12	139683	0.000111463	1.75733e-05	0.00158219	0.0884981	0.374117	0.412312
21	44963	13	113386	0.000110222	2.03874e-05	0.0028341	0.076684	0.289578	0.40212
21	44963	14	97335	0.000106	2.01341e-05	0.00311724	0.0746376	0.1562	0.328854
21	44963	15	85305	0.000116549	1.98582e-05	0.00210443	0.0831508	1.77724	0.482463
21	44963	16	91972	0.000125579	1.80342e-05	0.00111781	0.0976494	0.176818	0.305088
21	44963	17	79441	0.0001468	2.06539e-05	0.00103508	0.101116	0.0669265	0.102675
21	44963	18	87102	0.00013262	1.92944e-05	0.0011735	0.0971095	0.110187	0.21396
21	44963	19	72788	0.000117138	2.16184e-05	0.00281143	0.0773916	1.10238	0.4737
21	44963	1	225945	0.00012291	1.26934e-05	0.000318282	0.12787	0.222624	0.298236
21	44963	20	68796	0.000147766	2.43557e-05	0.00186375	0.0874238	0.0661966	0.128552
21	44963	21	44963	0.00178639	3.61252e-05	5.00354e-07	1	0	0
22	40358	10	152193	0.000146375	1.7516e-05	0.000560572	0.116839	0.0664728	0.0768147
22	40358	11	151749	0.000126103	2.30638e-05	0.0027215	0.078376	0.172428	0.336506
22	40358	12	139683	0.000136854	1.71129e-05	0.00066284	0.111523	0.0898293	0.141125
22	40358	13	113386	0.000115234	1.98497e-05	0.00219001	0.0822851	4.22325	0.492694
22	40358	14	97335	0.00016764	1.96188e-05	0.000514814	0.121152	0.0455789	0.0282516
22	40358	15	85305	0.000127368	1.93353e-05	0.00137511	0.0932658	0.153479	0.288105
22	40358	16	91972	0.000142591	1.75628e-05	0.000625807	0.113801	0.0740454	0.0995632
22	40358	17	79441	0.000121354	2.01041e-05	0.00189884	0.0857925	0.300831	0.39483
22	40358	18	87102	0.000114936	1.87839e-05	0.00180643	0.0863794	2.36944	0.486333
22	40358	19	72788	0.000116418	2.10484e-05	0.00261057	0.0789443	2.08256	0.485789
22	40358	1	225945	9.98885e-05	1.23605e-05	0.000636977	0.106659	0.0837549	0.135911
22	40358	20	68796	0.000129646	2.37096e-05	0.00272056	0.0787258	0.133064	0.292956
22	40358	21	44963	0.000117956	2.48708e-05	0.00450941	0.0686248	0.730572	0.46484
22	40358	22	40358	0.00169944	3.42452e-05	4.93315e-07	1	0	0
2	241226	10	152193	0.00015268	9.40962e-06	4.22051e-05	0.20941	0.0528808	0.00833855
2	241226	11	151749	0.000142257	1.23783e-05	0.000163631	0.151924	0.070486	0.0486965
2	241226	12	139683	0.000139076	9.18504e-06	5.54513e-05	0.194739	0.0760834	0.0313342
2	241226	13	113386	0.000165819	1.06754e-05	5.01437e-05	0.203456	0.0429316	0.00452168
2	241226	14	97335	0.00012448	1.05161e-05	0.000145799	0.154579	0.183425	0.223409
2	241226	15	85305	0.000127876	1.03731e-05	0.000124391	0.160895	0.136116	0.151328
2	241226	16	91972	0.000134494	9.42288e-06	6.9979e-05	0.184439	0.0919551	0.0576781
2	241226	17	79441	0.000156962	1.08026e-05	6.52331e-05	0.190672	0.0495661	0.00917616
2	241226	18	87102	0.00015812	1.0097e-05	4.85549e-05	0.204191	0.0482097	0.00665583
2	241226	19	72788	0.000143964	1.12991e-05	0.000109308	0.167745	0.0667229	0.0328864
2	241226	1	225945	0.000137639	6.63772e-06	1.5978e-05	0.252534	0.0758334	0.0145512
2	241226	20	68796	0.000113016	1.27178e-05	0.000443004	0.117922	0.575922	0.423881
2	241226	21	44963	0.000143811	1.33482e-05	0.000210428	0.143762	0.0679651	0.0509436
2	241226	22	40358	0.000128674	1.29909e-05	0.000291593	0.132022	0.131345	0.185847
2	241226	2	241226	0.000571358	9.85394e-06	2.6489e-07	1	0	0
3	212643	10	152193	0.000147744	1.03183e-05	6.9107e-05	0.187903	0.0601502	0.0176966
3	212643	11	151749	0.000172122	1.3603e-05	0.000112317	0.17045	0.0407877	0.00696497
3	212643	12	139683	0.000148653	1.00839e-05	6.16202e-05	0.193012	0.0586979	0.015133
3	212643	13	113386	0.000178067	1.17229e-05	5.4763e-05	0.202595	0.0376532	0.00288327
3	212643	14	97335	0.000147262	1.15487e-05	0.000108967	0.16957	0.0617274	0.0257647
3	212643	15	85305	0.00012134	1.13811e-05	0.000219171	0.141569	0.281657	0.320818
3	212643	16	91972	0.000169869	1.03683e-05	4.06233e-05	0.216011	0.0408874	0.00307869
3	212643	17	79441	0.000143986	1.18416e-05	0.000131263	0.162188	0.067571	0.0371674
3	212643	18	87102	0.000161132	1.10785e-05	6.4977e-05	0.192948	0.0466895	0.00723177
3	212643	19	72788	0.000158989	1.24073e-05	0.000106889	0.171779	0.0489333	0.0123308
3	212643	1	225945	0.000135981	7.28097e-06	2.41942e-05	0.231347	0.0825031	0.024304
3	212643	20	68796	0.000147245	1.39638e-05	0.000228754	0.142463	0.0627902	0.042917
3	212643	21	44963	0.000118479	1.46396e-05	0.000633447	0.109826	0.562392	0.427345
3	212643	22	40358	0.000132566	1.42559e-05	0.00037205	0.126124	0.10605	0.150049
3	212643	2	241226	0.000135801	7.65209e-06	2.9614e-05	0.222005	0.0839756	0.0286795
3	212643	3	212643	0.000664376	1.18652e-05	3.04535e-07	1	0	0
4	222219	10	152193	0.000136646	1.05374e-05	0.00010201	0.170646	0.0854043	0.0581845
4	222219	11	151749	0.000115698	1.38731e-05	0.000564922	0.112502	20.1429	0.497906
4	222219	12	139683	0.000123219	1.02926e-05	0.000139499	0.157095	0.212753	0.250628
4	222219	13	113386	0.000179422	1.19798e-05	5.78921e-05	0.200446	0.0372617	0.00288546
4	222219	14	97335	0.00013703	1.1796e-05	0.000156904	0.154935	0.085264	0.0716777
4	222219	15	85305	0.000171741	1.16617e-05	6.18644e-05	0.19675	0.0405511	0.00416398
4	222219	16	91972	0.000113354	1.05616e-05	0.000213577	0.141539	0.659715	0.420308
4	222219	17	79441	0.000147492	1.21027e-05	0.000130117	0.163134	0.0617965	0.0287944
4	222219	18	87102	0.000138058	1.13041e-05	0.000129019	0.16233	0.0816673	0.0588802
4	222219	19	72788	0.000150641	1.26724e-05	0.000143406	0.159816	0.0576758	0.0251413
4	222219	1	225945	0.000134851	7.43953e-06	2.72348e-05	0.225277	0.0869456	0.0303097
4	222219	20	68796	0.000150636	1.42713e-05	0.000227881	0.143109	0.0582033	0.0348917
4	222219	21	44963	0.000142559	1.4966e-05	0.000339088	0.129758	0.0720059	0.0729457
4	222219	22	40358	0.000113497	1.45659e-05	0.000731615	0.10603	0.727475	0.445584
4	222219	2	241226	0.000145699	7.82694e-06	2.45106e-05	0.23388	0.0605437	0.00905054
4	222219	3	212643	0.000135389	8.57912e-06	4.71002e-05	0.201525	0.0872944	0.0410809
4	222219	4	222219	0.00068869	1.23909e-05	3.13688e-07	1	0	0
5	193610	10	152193	0.000134921	1.1426e-05	0.000147195	0.157359	0.0930635	0.0830614
5	193610	11	151749	0.000148104	1.50532e-05	0.000299244	0.134498	0.0622245	0.0483634
5	193610	12	139683	0.000134503	1.1165e-05	0.000136125	0.16015	0.0945985	0.0828597
5	193610	13	113386	0.000156927	1.2964e-05	0.000133593	0.16373	0.0512035	0.0164874
5	193610	14	97335	0.000129335	1.27892e-05	0.000269051	0.136572	0.127302	0.171882
5	193610	15	85305	0.000120019	1.26127e-05	0.000340444	0.12841	0.368214	0.372434
5	193610	16	91972	0.000132375	1.14565e-05	0.000160223	0.154367	0.105472	0.108575
5	193610	17	79441	0.000140899	1.31201e-05	0.000213083	0.145544	0.0754422	0.0629648
5	193610	18	87102	0.000154204	1.22676e-05	0.000115258	0.169333	0.0536523	0.017156
5	193610	19	72788	0.000162753	1.37495e-05	0.0001458	0.161257	0.0468472	0.0131205
5	193610	1	225945	0.000124828	8.06289e-06	5.07981e-05	0.194754	0.170456	0.158485
5	193610	20	68796	0.000121095	1.54662e-05	0.000718351	0.107442	0.303525	0.370612
5	193610	21	44963	0.000140365	1.62285e-05	0.000491416	0.119319	0.0781885	0.10085
5	193610	22	40358	9.48642e-05	1.57994e-05	0.00193621	0.0827666	0.0629635	0.129489
5	193610	2	241226	0.000160312	8.50094e-06	2.32826e-05	0.240333	0.0452705	0.00302551
5	193610	3	212643	0.000128297	9.30006e-06	8.00074e-05	0.17835	0.130754	0.122136
5	193610	4	222219	0.000151567	9.51768e-06	4.54464e-05	0.206888	0.0545044	0.00958638
5	193610	5	193610	0.000789597	1.45727e-05	3.47273e-07	1	0	0
6	206162	10	152193	0.000141485	1.37682e-05	0.000252848	0.140035	0.074452	0.0665728
6	206162	11	151749	0.000111576	1.81277e-05	0.00176767	0.0859877	0.385435	0.417196
6	206162	12	139683	0.000151684	1.34595e-05	0.000176611	0.153268	0.057058	0.0274376
6	206162	13	113386	0.000155525	1.56137e-05	0.000285302	0.137705	0.0537566	0.0312646
6	206162	14	97335	9.93755e-05	1.54096e-05	0.00148789	0.0890514	0.0844398	0.175544
6	206162	15	85305	0.000128432	1.51981e-05	0.000537143	0.116611	0.138298	0.223297
6	206162	16	91972	0.000109271	1.38008e-05	0.000688493	0.108135	0.235009	0.334661
6	206162	17	79441	0.000138926	1.58056e-05	0.000462007	0.121783	0.0825279	0.107035
6	206162	18	87102	0.000133396	1.47666e-05	0.000415904	0.12431	0.103212	0.14741
6	206162	19	72788	9.43188e-05	1.65471e-05	0.00234084	0.0793059	0.0615693	0.133591
6	206162	1	225945	0.00011276	9.71356e-06	0.000157337	0.149295	0.506977	0.39152
6	206162	20	68796	9.13801e-05	1.86385e-05	0.00401404	0.0688045	0.0528731	0.131522
6	206162	21	44963	8.7971e-05	1.95529e-05	0.0054149	0.0634608	0.0448464	0.114983
6	206162	22	40358	0.000101868	1.9034e-05	0.00293904	0.0754241	0.104376	0.254952
6	206162	2	241226	0.000121658	1.021e-05	0.000142084	0.154777	0.261709	0.293026
6	206162	3	212643	9.40398e-05	1.1208e-05	0.000552007	0.110939	0.0575424	0.0630557
6	206162	4	222219	0.000132872	1.14517e-05	0.00015764	0.153915	0.10209	0.103065
6	206162	5	193610	0.000117082	1.24158e-05	0.000352517	0.126663	1.07573	0.455972
6	206162	6	206162	0.00109408	2.11562e-05	4.18402e-07	1	0	0
7	177380	10	152193	0.000116808	1.1284e-05	0.000245776	0.137705	1.30865	0.460631
7	177380	11	151749	0.000108014	1.48634e-05	0.000952237	0.0991506	0.193737	0.317882
7	177380	12	139683	0.000124422	1.10271e-05	0.000175781	0.149747	0.187571	0.234691
7	177380	13	113386	0.000144763	1.27997e-05	0.000174178	0.152671	0.0669328	0.0423485
7	177380	14	97335	0.000114006	1.26328e-05	0.000417511	0.121686	0.952423	0.452251
7	177380	15	85305	0.000154177	1.24739e-05	0.000123121	0.166739	0.0537623	0.0180857
7	177380	16	91972	0.000128649	1.13169e-05	0.000170734	0.151642	0.131656	0.156779
7	177380	17	79441	0.000128348	1.29573e-05	0.000291522	0.134012	0.136382	0.190714
7	177380	18	87102	0.000128774	1.21068e-05	0.000221186	0.142936	0.131501	0.169085
7	177380	19	72788	0.000124558	1.35651e-05	0.000390622	0.124746	0.189314	0.272969
7	177380	1	225945	0.000135142	7.96973e-06	3.54597e-05	0.213123	0.0868254	0.0350482
7	177380	20	68796	0.000122716	1.52792e-05	0.000652114	0.110056	0.236979	0.333251
7	177380	21	44963	0.000114545	1.60278e-05	0.00101402	0.0984224	1.46764	0.474875
7	177380	22	40358	0.000113245	1.56052e-05	0.000957312	0.0998708	0.656096	0.443191
7	177380	2	241226	0.000140583	8.37963e-06	3.69885e-05	0.213034	0.0712886	0.0202023
7	177380	3	212643	0.000127707	9.18742e-06	7.76595e-05	0.179448	0.136317	0.1292
7	177380	4	222219	0.000133587	9.39087e-06	7.09115e-05	0.184316	0.0962162	0.0639559
7	177380	5	193610	0.000130093	1.01822e-05	0.000108128	0.167634	0.117856	0.113995
7	177380	6	206162	0.000119799	1.22657e-05	0.000307844	0.131002	0.384542	0.375246
7	177380	7	177380	0.000773389	1.42222e-05	3.42312e-07	1	0	0
8	163433	10	152193	0.000147967	1.13024e-05	9.82728e-05	0.174393	0.0607599	0.0227296
8	163433	11	151749	0.000143244	1.48789e-05	0.000325456	0.131455	0.0707194	0.068293
8	163433	12	139683	0.000126406	1.10349e-05	0.000165719	0.152096	0.155551	0.191772
8	163433	13	113386	0.000153001	1.28133e-05	0.000140915	0.161316	0.0551313	0.0214917
8	163433	14	97335	0.000140155	1.26468e-05	0.000188539	0.149557	0.0769899	0.0620067
8	163433	15	85305	0.000147409	1.24778e-05	0.000146931	0.159378	0.062417	0.0315377
8	163433	16	91972	0.000150141	1.1335e-05	9.38613e-05	0.176929	0.0579062	0.0189132
8	163433	17	79441	0.000126542	1.29656e-05	0.000308715	0.132091	0.156778	0.22346
8	163433	18	87102	0.000135281	1.2117e-05	0.00018318	0.150119	0.0924333	0.0898411
8	163433	19	72788	0.000123737	1.35741e-05	0.000401706	0.123892	0.207167	0.291017
8	163433	1	225945	0.000139902	7.97813e-06	3.1051e-05	0.220572	0.0722372	0.0189504
8	163433	20	68796	0.000132384	1.52913e-05	0.000489644	0.118696	0.108226	0.167174
8	163433	21	44963	0.000136545	1.60418e-05	0.000522503	0.117294	0.0898701	0.130927
8	163433	22	40358	0.000139871	1.56201e-05	0.000430199	0.12332	0.0793643	0.0975932
8	163433	2	241226	0.000118019	8.37664e-06	7.36457e-05	0.178794	0.624381	0.394413
8	163433	3	212643	0.000135431	9.19673e-06	6.18788e-05	0.190252	0.0881749	0.0485718
8	163433	4	222219	0.000121361	9.39357e-06	0.000103507	0.167404	0.273868	0.287031
8	163433	5	193610	0.000120014	1.01868e-05	0.000148517	0.154606	0.358431	0.344225
8	163433	6	206162	0.000119861	1.2274e-05	0.000308028	0.131036	0.379267	0.373563
8	163433	7	177380	0.000127497	1.0065e-05	0.000111827	0.166021	0.140623	0.151583
8	163433	8	163433	0.000774274	1.42414e-05	3.42587e-07	1	0	0
9	129410	10	152193	0.000161739	1.19477e-05	8.61717e-05	0.181993	0.0469014	0.00891821
9	129410	11	151749	0.000135134	1.57126e-05	0.000502218	0.118397	0.0952839	0.140947
9	129410	12	139683	0.000163695	1.16776e-05	7.51287e-05	0.188044	0.0454052	0.00717974
9	129410	13	113386	0.00014944	1.35306e-05	0.000191057	0.150427	0.060052	0.0332072
9	129410	14	97335	0.00013203	1.33549e-05	0.000293716	0.134508	0.109408	0.143144
9	129410	15	85305	0.000156706	1.31848e-05	0.000143502	0.161757	0.0517332	0.0176478
9	129410	16	91972	0.000156212	1.19758e-05	9.96913e-05	0.175748	0.0516418	0.0135983
9	129410	17	79441	0.000150195	1.37041e-05	0.000196871	0.149682	0.0591966	0.0323821
9	129410	18	87102	0.000185628	1.28395e-05	6.65293e-05	0.196661	0.0356907	0.0026464
9	129410	19	72788	0.000181182	1.43723e-05	0.000113961	0.173194	0.0376895	0.00503329
9	129410	1	225945	0.000138875	8.42538e-06	3.96646e-05	0.209038	0.0755347	0.0252315
9	129410	20	68796	0.000118768	1.61494e-05	0.000910393	0.101666	0.521632	0.427485
9	129410	21	44963	0.000146962	1.69477e-05	0.00048662	0.120527	0.0650952	0.0688713
9	129410	22	40358	0.000114569	1.64942e-05	0.00112833	0.096438	1.51294	0.476117
9	129410	2	241226	0.000161027	8.87504e-06	2.7131e-05	0.232903	0.0451037	0.00334043
9	129410	3	212643	0.000128552	9.7109e-06	9.40797e-05	0.172411	0.129386	0.126764
9	129410	4	222219	0.000134766	9.92596e-06	8.5182e-05	0.177476	0.0918925	0.0628104
9	129410	5	193610	0.000157349	1.07786e-05	6.40408e-05	0.193524	0.0497248	0.008831
9	129410	6	206162	0.000134767	1.29677e-05	0.000242046	0.14066	0.0951948	0.106789
9	129410	7	177380	0.0001476	1.06408e-05	7.8302e-05	0.183496	0.0608615	0.0196787
9	129410	8	163433	0.000138703	1.06426e-05	0.000100024	0.17239	0.0793498	0.0477696
9	129410	9	129410	0.000850473	1.58889e-05	3.64627e-07	1	0	0

## Sheet: CEU
unscale:	chr1	chr2	chr3	chr4	chr5	chr6	chr7	chr8	chr9	chr10	chr11	chr12	chr13	chr14	chr15	chr16	chr17	chr18	chr19	chr20	chr21	chr22
chr1	0.000503556	9.90002e-05	0.000102613	0.000109421	0.000107549	0.000118955	0.000105772	0.000104764	0.000101648	0.000111082	8.48962e-05	0.000111182	9.96269e-05	9.87229e-05	9.83083e-05	0.000126184	9.68642e-05	9.88005e-05	0.000119286	0.000116869	0.000123535	9.30963e-05
chr2	9.90002e-05	0.000502358	0.000118206	9.61732e-05	0.000120973	9.95643e-05	0.000105653	0.00012167	0.000109446	9.83255e-05	0.0001154	0.000117031	9.93983e-05	0.000104294	9.50041e-05	0.000109683	0.000110566	0.000101327	9.17343e-05	8.6473e-05	0.000128929	0.000100158
chr3	0.000102613	0.000118206	0.000601078	9.98061e-05	9.8856e-05	0.000103475	0.000112934	0.000103736	0.000111988	0.000104719	9.5095e-05	0.000104596	8.76254e-05	0.000111113	9.13165e-05	9.55294e-05	0.000114083	0.000108403	0.000125714	9.59586e-05	9.96379e-05	0.000111914
chr4	0.000109421	9.61732e-05	9.98061e-05	0.000617295	0.000119235	9.76703e-05	0.000107124	0.000103549	0.00010143	0.000118088	0.00010168	0.000103883	8.6848e-05	7.73545e-05	0.000111192	0.000108441	0.000105903	8.55635e-05	0.000115165	0.000132835	0.000105312	0.000109044
chr5	0.000107549	0.000120973	9.8856e-05	0.000119235	0.000694928	0.000112414	9.48191e-05	9.07943e-05	0.000102239	9.88118e-05	0.000123195	0.000114009	0.000102285	0.000109718	0.000110994	9.43831e-05	0.0001242	0.000100383	0.000104963	9.72604e-05	0.000103371	8.80355e-05
chr6	0.000118955	9.95643e-05	0.000103475	9.76703e-05	0.000112414	0.00102409	0.000104426	0.000100046	9.93264e-05	0.00010576	0.000100923	0.0001105	9.31419e-05	9.7655e-05	0.000108039	0.000108933	0.000103098	8.74091e-05	0.000104019	0.000113864	0.000100628	0.00012996
chr7	0.000105772	0.000105653	0.000112934	0.000107124	9.48191e-05	0.000104426	0.000725483	0.000113507	8.47214e-05	9.42673e-05	0.000120476	0.00010463	0.00012179	9.50303e-05	9.37748e-05	0.000106912	0.00013055	0.000105072	0.000116451	0.000113195	0.000130236	0.000110564
chr8	0.000104764	0.00012167	0.000103736	0.000103549	9.07943e-05	0.000100046	0.000113507	0.000748198	0.000114708	9.20185e-05	0.000100937	0.000110995	0.000124858	0.000103512	0.000124036	0.000104353	9.80487e-05	0.000102042	0.000114851	0.000104216	0.000100087	0.000114435
chr9	0.000101648	0.000109446	0.000111988	0.00010143	0.000102239	9.93264e-05	8.47214e-05	0.000114708	0.000738606	9.27233e-05	7.27956e-05	9.90505e-05	9.22392e-05	0.000114551	8.79419e-05	0.00010762	0.000106089	0.000102243	0.000108372	0.000100298	6.0293e-05	0.000112343
chr10	0.000111082	9.83255e-05	0.000104719	0.000118088	9.88118e-05	0.00010576	9.42673e-05	9.20185e-05	9.27233e-05	0.000779125	0.000108726	7.66126e-05	0.00010208	7.74153e-05	0.000105894	9.13709e-05	0.000127572	8.7647e-05	0.000110107	0.000100202	0.000118267	0.000111725
chr11	8.48962e-05	0.0001154	9.5095e-05	0.00010168	0.000123195	0.000100923	0.000120476	0.000100937	7.27956e-05	0.000108726	0.00122515	0.000112867	0.000124106	0.00011438	0.000125997	9.11909e-05	0.000118794	0.000115042	0.000122259	0.000146578	0.000103421	9.97446e-05
chr12	0.000111182	0.000117031	0.000104596	0.000103883	0.000114009	0.0001105	0.00010463	0.000110995	9.90505e-05	7.66126e-05	0.000112867	0.000801703	0.000110173	0.000109819	9.55487e-05	0.000102038	0.000117771	0.000108838	0.000107841	0.000114974	0.000123013	9.5446e-05
chr13	9.96269e-05	9.93983e-05	8.76254e-05	8.6848e-05	0.000102285	9.31419e-05	0.00012179	0.000124858	9.22392e-05	0.00010208	0.000124106	0.000110173	0.00100838	0.0001137	9.87153e-05	0.000106371	0.000120285	0.000105216	0.000121987	0.000120476	0.000115117	0.000100659
chr14	9.87229e-05	0.000104294	0.000111113	7.73545e-05	0.000109718	9.7655e-05	9.50303e-05	0.000103512	0.000114551	7.74153e-05	0.00011438	0.000109819	0.0001137	0.00110402	8.98378e-05	0.000118859	0.000148315	0.000102559	0.000115602	0.000132406	9.15535e-05	0.000126724
chr15	9.83083e-05	9.50041e-05	9.13165e-05	0.000111192	0.000110994	0.000108039	9.37748e-05	0.000124036	8.79419e-05	0.000105894	0.000125997	9.55487e-05	9.87153e-05	8.98378e-05	0.000999854	0.000113755	8.73495e-05	8.26533e-05	9.61396e-05	0.000116314	0.000126903	9.20046e-05
chr16	0.000126184	0.000109683	9.55294e-05	0.000108441	9.43831e-05	0.000108933	0.000106912	0.000104353	0.00010762	9.13709e-05	9.11909e-05	0.000102038	0.000106371	0.000118859	0.000113755	0.00087598	9.14196e-05	0.000112325	0.000104104	0.000109302	0.00011115	0.000109198
chr17	9.68642e-05	0.000110566	0.000114083	0.000105903	0.0001242	0.000103098	0.00013055	9.80487e-05	0.000106089	0.000127572	0.000118794	0.000117771	0.000120285	0.000148315	8.73495e-05	9.14196e-05	0.00121114	0.000106844	0.000106844	0.00011009	0.000110729	0.000111891
chr18	9.88005e-05	0.000101327	0.000108403	8.55635e-05	0.000100383	8.74091e-05	0.000105072	0.000102042	0.000102243	8.7647e-05	0.000115042	0.000108838	0.000105216	0.000102559	8.26533e-05	0.000112325	0.000106844	0.00100816	0.000121006	0.000116479	0.000120358	0.0001371
chr19	0.000119286	9.17343e-05	0.000125714	0.000115165	0.000104963	0.000104019	0.000116451	0.000114851	0.000108372	0.000110107	0.000122259	0.000107841	0.000121987	0.000115602	9.61396e-05	0.000104104	0.000106844	0.000121006	0.00121235	9.95677e-05	0.000114279	0.000134135
chr20	0.000116869	8.6473e-05	9.59586e-05	0.000132835	9.72604e-05	0.000113864	0.000113195	0.000104216	0.000100298	0.000100202	0.000146578	0.000114974	0.000120476	0.000132406	0.000116314	0.000109302	0.00011009	0.000116479	9.95677e-05	0.00137378	9.24904e-05	0.000132918
chr21	0.000123535	0.000128929	9.96379e-05	0.000105312	0.000103371	0.000100628	0.000130236	0.000100087	6.0293e-05	0.000118267	0.000103421	0.000123013	0.000115117	9.15535e-05	0.000126903	0.00011115	0.000110729	0.000120358	0.000114279	9.24904e-05	0.00177622	0.000120927
chr22	9.30963e-05	0.000100158	0.000111914	0.000109044	8.80355e-05	0.00012996	0.000110564	0.000114435	0.000112343	0.000111725	9.97446e-05	9.5446e-05	0.000100659	0.000126724	9.20046e-05	0.000109198	0.000111891	0.0001371	0.000134135	0.000132918	0.000120927	0.00160588
scale:	chr1	chr2	chr3	chr4	chr5	chr6	chr7	chr8	chr9	chr10	chr11	chr12	chr13	chr14	chr15	chr16	chr17	chr18	chr19	chr20	chr21	chr22
chr1	1	0.198527	0.188076	0.19785	0.183294	0.166777	0.176458	0.172138	0.168294	0.178884	0.108857	0.176549	0.141046	0.133613	0.139982	0.192025	0.125235	0.140079	0.154219	0.141887	0.132027	0.104795
chr2	0.198527	1	0.216856	0.174055	0.206361	0.139719	0.176422	0.200101	0.181371	0.158486	0.148106	0.186009	0.140852	0.141284	0.135402	0.167068	0.143081	0.143793	0.118709	0.10508	0.13792	0.112847
chr3	0.188076	0.216856	1	0.165097	0.154131	0.13272	0.172362	0.155935	0.169624	0.154276	0.111551	0.151947	0.113491	0.137576	0.118954	0.132996	0.134937	0.140605	0.14869	0.106579	0.0974199	0.11525
chr4	0.19785	0.174055	0.165097	1	0.183398	0.123585	0.161291	0.153554	0.151559	0.171626	0.117667	0.148876	0.110967	0.0944859	0.142891	0.148935	0.123572	0.109484	0.134376	0.145546	0.101579	0.110779
chr5	0.183294	0.206361	0.154131	0.183398	1	0.134069	0.134562	0.126906	0.143993	0.13536	0.134375	0.154003	0.123185	0.126318	0.134443	0.122182	0.136597	0.121068	0.115437	0.100446	0.0939786	0.0842989
chr6	0.166777	0.139719	0.13272	0.123585	0.134069	1	0.121913	0.115036	0.11508	0.119184	0.0905576	0.122789	0.0922781	0.09249	0.107654	0.116006	0.0932779	0.0867236	0.0941091	0.0967374	0.0752598	0.102373
chr7	0.176458	0.176422	0.172362	0.161291	0.134562	0.121913	1	0.155301	0.116801	0.126408	0.128634	0.138348	0.143576	0.107098	0.111187	0.135477	0.140548	0.124047	0.125366	0.114434	0.115903	0.103636
chr8	0.172138	0.200101	0.155935	0.153554	0.126906	0.115036	0.155301	1	0.155756	0.12153	0.106145	0.144549	0.144971	0.114896	0.144847	0.130239	0.103964	0.118651	0.121777	0.103767	0.0877269	0.105645
chr9	0.168294	0.181371	0.169624	0.151559	0.143993	0.11508	0.116801	0.155756	1	0.123395	0.0771359	0.129979	0.107916	0.128119	0.103481	0.135342	0.113349	0.119793	0.115785	0.100628	0.0532508	0.104505
chr10	0.178884	0.158486	0.154276	0.171626	0.13536	0.119184	0.126408	0.12153	0.123395	1	0.112058	0.0977854	0.116163	0.0842172	0.121198	0.111765	0.132574	0.099883	0.114422	0.0977816	0.101597	0.101088
chr11	0.108857	0.148106	0.111551	0.117667	0.134375	0.0905576	0.128634	0.106145	0.0771359	0.112058	1	0.114705	0.112451	0.0990755	0.114822	0.0888158	0.0982971	0.104389	0.101161	0.113892	0.0707403	0.0718589
chr12	0.176549	0.186009	0.151947	0.148876	0.154003	0.122789	0.138348	0.144549	0.129979	0.0977854	0.114705	1	0.123626	0.117803	0.107834	0.123073	0.120683	0.122304	0.110505	0.110633	0.104202	0.0851555
chr13	0.141046	0.140852	0.113491	0.110967	0.123185	0.0922781	0.143576	0.144971	0.107916	0.116163	0.112451	0.123626	1	0.108741	0.0993271	0.114388	0.109894	0.105414	0.111447	0.103357	0.0869395	0.0800685
chr14	0.133613	0.141284	0.137576	0.0944859	0.126318	0.09249	0.107098	0.114896	0.128119	0.0842172	0.0990755	0.117803	0.108741	1	0.086415	0.122189	0.129537	0.0982275	0.100964	0.108592	0.0660995	0.0963641
chr15	0.139982	0.135402	0.118954	0.142891	0.134443	0.107654	0.111187	0.144847	0.103481	0.121198	0.114822	0.107834	0.0993271	0.086415	1	0.123034	0.0802637	0.0832857	0.0883386	0.100362	0.0963932	0.0736062
chr16	0.192025	0.167068	0.132996	0.148935	0.122182	0.116006	0.135477	0.130239	0.135342	0.111765	0.0888158	0.123073	0.114388	0.122189	0.123034	1	0.0897782	0.120965	0.102232	0.100795	0.0902308	0.0933671
chr17	0.125235	0.143081	0.134937	0.123572	0.136597	0.0932779	0.140548	0.103964	0.113349	0.132574	0.0982971	0.120683	0.109894	0.129537	0.0802637	0.0897782	1	0.0977555	0.0891408	0.0862512	0.0763686	0.0812794
chr18	0.140079	0.143793	0.140605	0.109484	0.121068	0.0867236	0.124047	0.118651	0.119793	0.099883	0.104389	0.122304	0.105414	0.0982275	0.0832857	0.120965	0.0977555	1	0.11071	0.100073	0.0910288	0.109213
chr19	0.154219	0.118709	0.14869	0.134376	0.115437	0.0941091	0.125366	0.121777	0.115785	0.114422	0.101161	0.110505	0.111447	0.100964	0.0883386	0.102232	0.0891408	0.11071	1	0.0780055	0.0788148	0.0974355
chr20	0.141887	0.10508	0.106579	0.145546	0.100446	0.0967374	0.114434	0.103767	0.100628	0.0977816	0.113892	0.110633	0.103357	0.108592	0.100362	0.100795	0.0862512	0.100073	0.0780055	1	0.0599002	0.0906662
chr21	0.132027	0.13792	0.0974199	0.101579	0.0939786	0.0752598	0.115903	0.0877269	0.0532508	0.101597	0.0707403	0.104202	0.0869395	0.0660995	0.0963932	0.0902308	0.0763686	0.0910288	0.0788148	0.0599002	1	0.0726145
chr22	0.104795	0.112847	0.11525	0.110779	0.0842989	0.102373	0.103636	0.105645	0.104505	0.101088	0.0718589	0.0851555	0.0800685	0.0963641	0.0736062	0.0933671	0.0812794	0.109213	0.0974355	0.0906662	0.0726145	1
raw result:
Tagi	SNPi	Tagj	SNPj	rsq	sd	pval	rsq_s	sd_s	pval_s
10	152196	10	152196	0.000779125	1.37483e-05	2.90259e-07	1	0	0
11	151749	10	152196	0.000108726	1.25209e-05	0.000484028	0.112058	0.209532	0.310566
11	151749	11	151749	0.00122515	2.28047e-05	3.59305e-07	1	0	0
12	139683	10	152196	7.66126e-05	9.889e-06	0.000747767	0.0977854	0.0379665	0.0308074
12	139683	11	151749	0.000112867	1.27285e-05	0.000446694	0.114705	0.134703	0.221225
12	139683	12	139683	0.000801703	1.42067e-05	2.95213e-07	1	0	0
13	113390	10	152196	0.00010208	1.12475e-05	0.000408532	0.116163	26.2213	0.498339
13	113390	11	151749	0.000124106	1.44893e-05	0.00051012	0.112451	0.0737533	0.101011
13	113390	12	139683	0.000110173	1.14341e-05	0.000324388	0.123626	0.173562	0.257815
13	113390	13	113390	0.00100838	1.84033e-05	3.32079e-07	1	0	0
14	97332	10	152196	7.74153e-05	1.18313e-05	0.00140987	0.0842172	0.0404251	0.0528147
14	97332	11	151749	0.00011438	1.5232e-05	0.000841531	0.0990755	0.122173	0.231445
14	97332	12	139683	0.000109819	1.20221e-05	0.000398492	0.117803	0.18182	0.276179
14	97332	13	113390	0.0001137	1.36835e-05	0.000572864	0.108741	0.127477	0.220857
14	97332	14	97332	0.00110402	2.03452e-05	3.45208e-07	1	0	0
15	85307	10	152196	0.000105894	1.11946e-05	0.000348332	0.121198	0.351165	0.37369
15	85307	11	151749	0.000125997	1.44217e-05	0.000472863	0.114822	0.0690345	0.0857973
15	85307	12	139683	9.55487e-05	1.138e-05	0.00055055	0.107834	0.189305	0.299698
15	85307	13	113390	9.87153e-05	1.29518e-05	0.000795501	0.0993271	0.388051	0.405302
15	85307	14	97332	8.98378e-05	1.36191e-05	0.00136805	0.086415	0.0965015	0.210574
15	85307	15	85307	0.000999854	1.82302e-05	3.30807e-07	1	0	0
16	91974	10	152196	9.13709e-05	1.03947e-05	0.00046192	0.111765	0.108952	0.181481
16	91974	11	151749	9.11909e-05	1.3387e-05	0.00121364	0.0888158	0.109667	0.231721
16	91974	12	139683	0.000102038	1.05655e-05	0.000321517	0.123073	171.309	0.499731
16	91974	13	113390	0.000106371	1.20253e-05	0.000450897	0.114388	0.316874	0.368183
16	91974	14	97332	0.000118859	1.26459e-05	0.000357041	0.122189	0.0917708	0.126924
16	91974	15	85307	0.000113755	1.19696e-05	0.000342103	0.123034	0.125564	0.19132
16	91974	16	91974	0.00087598	1.57149e-05	3.10071e-07	1	0	0
17	79445	10	152196	0.000127572	1.24476e-05	0.000255486	0.132574	0.0645256	0.0545599
17	79445	11	151749	0.000118794	1.60263e-05	0.000883746	0.0982971	0.0939392	0.177221
17	79445	12	139683	0.000117771	1.26499e-05	0.000370374	0.120683	0.0969432	0.140564
17	79445	13	113390	0.000120285	1.43976e-05	0.000561121	0.109894	0.0866312	0.136705
17	79445	14	97332	0.000148315	1.51503e-05	0.000305101	0.129537	0.0422788	0.0187583
17	79445	15	85307	8.73495e-05	1.43289e-05	0.00183139	0.0802637	0.078314	0.181672
17	79445	16	91974	9.14196e-05	1.33032e-05	0.00117446	0.0897782	0.112537	0.234841
17	79445	17	79445	0.00121114	2.25203e-05	3.57799e-07	1	0	0
18	87103	10	152196	8.7647e-05	1.1248e-05	0.000731541	0.099883	0.0780705	0.134965
18	87103	11	151749	0.000115042	1.44853e-05	0.000680511	0.104389	0.116179	0.209853
18	87103	12	139683	0.000108838	1.14325e-05	0.000339842	0.122304	0.20537	0.291774
18	87103	13	113390	0.000105216	1.30116e-05	0.000635443	0.105414	0.430503	0.409306
18	87103	14	97332	0.000102559	1.36808e-05	0.000846898	0.0982275	2.54319	0.485521
18	87103	15	85307	8.26533e-05	1.29531e-05	0.00154745	0.0832857	0.0556358	0.104372
18	87103	16	91974	0.000112325	1.20245e-05	0.000365605	0.120965	0.141259	0.22004
18	87103	17	79445	0.000106844	1.43936e-05	0.000879018	0.0977555	0.292274	0.377415
18	87103	18	87103	0.00100816	1.83987e-05	3.32046e-07	1	0	0
19	72788	10	152196	0.000110107	1.24495e-05	0.000451152	0.114422	0.176341	0.275898
19	72788	11	151749	0.000122259	1.60358e-05	0.000794557	0.101161	0.0801543	0.137746
19	72788	12	139683	0.000107841	1.26551e-05	0.00052023	0.110505	0.240673	0.334985
19	72788	13	113390	0.000121987	1.44059e-05	0.000532957	0.111447	0.0804001	0.118983
19	72788	14	97332	0.000115602	1.51452e-05	0.00079109	0.100964	0.11264	0.210369
19	72788	15	85307	9.61396e-05	1.43354e-05	0.0012864	0.0883386	0.214963	0.351086
19	72788	16	91974	0.000104104	1.33096e-05	0.000721129	0.102232	0.656265	0.441876
19	72788	17	79445	0.000106844	1.5933e-05	0.00128685	0.0891408	0.295064	0.388814
19	72788	18	87103	0.000121006	1.44039e-05	0.000549371	0.11071	0.0839925	0.128944
19	72788	19	72788	0.00121235	2.25448e-05	3.5793e-07	1	0	0
1	225956	10	152196	0.000111082	7.4874e-06	6.00929e-05	0.178884	0.147898	0.146531
1	225956	11	151749	8.48962e-05	9.64483e-06	0.000459486	0.108857	0.0612157	0.0749947
1	225956	12	139683	0.000111182	7.6112e-06	6.38781e-05	0.176549	0.146771	0.147675
1	225956	13	113390	9.96269e-05	8.66149e-06	0.000163084	0.141046	0.508284	0.397576
1	225956	14	97332	9.87229e-05	9.10706e-06	0.000205455	0.133613	0.367881	0.367419
1	225956	15	85307	9.83083e-05	8.62075e-06	0.000168654	0.139982	0.324192	0.344076
1	225956	16	91974	0.000126184	8.01133e-06	4.74615e-05	0.192025	0.0635126	0.0195159
1	225956	17	79445	9.68642e-05	9.58166e-06	0.000269414	0.125235	0.232249	0.309172
1	225956	18	87103	9.88005e-05	8.66047e-06	0.000168394	0.140079	0.375584	0.36405
1	225956	19	72788	0.000119286	9.58979e-06	0.000120093	0.154219	0.0856227	0.0730212
1	225956	1	225956	0.000503556	8.15291e-06	2.05789e-07	1	0	0
20	68815	10	152196	0.000100202	1.33232e-05	0.000836627	0.0977816	0.712401	0.44873
20	68815	11	151749	0.000146578	1.71711e-05	0.000516788	0.113892	0.0438086	0.0300315
20	68815	12	139683	0.000114974	1.35448e-05	0.000528039	0.110633	0.115741	0.196634
20	68815	13	113390	0.000120476	1.54169e-05	0.000723646	0.103357	0.0863495	0.148705
20	68815	14	97332	0.000132406	1.62134e-05	0.00061202	0.108592	0.0578985	0.0669841
20	68815	15	85307	0.000116314	1.53433e-05	0.000811899	0.100362	0.107782	0.202242
20	68815	16	91974	0.000109302	1.42447e-05	0.000775481	0.100795	0.197426	0.318277
20	68815	17	79445	0.00011009	1.70522e-05	0.00148183	0.0862512	0.182474	0.33054
20	68815	18	87103	0.000116479	1.54141e-05	0.000821738	0.100073	0.106733	0.200768
20	68815	19	72788	9.95677e-05	1.70612e-05	0.00214841	0.0780055	0.540415	0.446105
20	68815	1	225956	0.000116869	1.02621e-05	0.000169534	0.141887	0.0980591	0.11073
20	68815	20	68815	0.00137378	2.58226e-05	3.73623e-07	1	0	0
21	44951	10	152196	0.000118267	1.52884e-05	0.000751988	0.101597	0.0956285	0.173966
21	44951	11	151749	0.000103421	1.96879e-05	0.00314215	0.0707403	1.00169	0.473545
21	44951	12	139683	0.000123013	1.55423e-05	0.000689471	0.104202	0.0771405	0.124057
21	44951	13	113390	0.000115117	1.76872e-05	0.00143801	0.0869395	0.117481	0.250181
21	44951	14	97332	9.15535e-05	1.85966e-05	0.00395578	0.0660995	0.117315	0.301613
21	44951	15	85307	0.000126903	1.76064e-05	0.000982075	0.0963932	0.0681905	0.115185
21	44951	16	91974	0.00011115	1.63439e-05	0.00122115	0.0902308	0.161699	0.303295
21	44951	17	79445	0.000110729	1.95651e-05	0.00240222	0.0763686	0.171754	0.33979
21	44951	18	87103	0.000120358	1.7686e-05	0.00121807	0.0910288	0.0878131	0.179233
21	44951	19	72788	0.000114279	1.95762e-05	0.0021461	0.0788148	0.125952	0.282705
21	44951	1	225956	0.000123535	1.17759e-05	0.000233387	0.132027	0.0722249	0.0707775
21	44951	20	68815	9.24904e-05	2.09506e-05	0.00577921	0.0599002	0.131537	0.336227
21	44951	21	44951	0.00177622	3.39941e-05	4.01505e-07	1	0	0
22	40352	10	152196	0.000111725	1.44888e-05	0.000761131	0.101088	0.15106	0.270008
22	40352	11	151749	9.97446e-05	1.86595e-05	0.00295169	0.0718589	0.586594	0.454205
22	40352	12	139683	9.5446e-05	1.4728e-05	0.00146112	0.0851555	0.190464	0.338974
22	40352	13	113390	0.000100659	1.67624e-05	0.00193527	0.0800685	0.978746	0.469365
22	40352	14	97332	0.000126724	1.76281e-05	0.000991873	0.0963641	0.0687488	0.116818
22	40352	15	85307	9.20046e-05	1.66839e-05	0.00263876	0.0736062	0.122474	0.29012
22	40352	16	91974	0.000109198	1.549e-05	0.00106744	0.0933671	0.201756	0.333792
22	40352	17	79445	0.000111891	1.85433e-05	0.00190138	0.0812794	0.15283	0.311505
22	40352	18	87103	0.0001371	1.67678e-05	0.000609207	0.109213	0.0521472	0.0521603
22	40352	19	72788	0.000134135	1.85585e-05	0.000971933	0.0974355	0.0562712	0.0791991
22	40352	1	225956	9.30963e-05	1.11576e-05	0.000563891	0.104795	0.130849	0.234036
22	40352	20	68815	0.000132918	1.98607e-05	0.00129642	0.0906662	0.0582556	0.0973051
22	40352	21	44951	0.000120927	2.27835e-05	0.00302784	0.0726145	0.0875304	0.226704
22	40352	22	40352	0.00160588	3.05354e-05	3.91235e-07	1	0	0
2	241227	10	152196	9.83255e-05	7.47528e-06	9.64753e-05	0.158486	0.319746	0.323064
2	241227	11	151749	0.0001154	9.62921e-06	0.000138922	0.148106	0.106609	0.118548
2	241227	12	139683	0.000117031	7.60176e-06	5.19338e-05	0.186009	0.0941467	0.0596916
2	241227	13	113390	9.93983e-05	8.64857e-06	0.000163597	0.140852	0.462804	0.38802
2	241227	14	97332	0.000104294	9.0934e-06	0.000164926	0.141284	0.567482	0.407824
2	241227	15	85307	9.50041e-05	8.6083e-06	0.00019161	0.135402	0.165854	0.230052
2	241227	16	91974	0.000109683	7.99262e-06	8.16785e-05	0.167068	0.17445	0.196228
2	241227	17	79445	0.000110566	9.56786e-06	0.000160147	0.143081	0.160345	0.211323
2	241227	18	87103	0.000101327	8.64743e-06	0.000151692	0.143793	1.76881	0.469557
2	241227	19	72788	9.17343e-05	9.57342e-06	0.000331414	0.118709	0.110337	0.171274
2	241227	1	225956	9.90002e-05	5.75653e-06	3.35348e-05	0.198527	0.377114	0.313212
2	241227	20	68815	8.6473e-05	1.0247e-05	0.000539985	0.10508	0.0691622	0.101652
2	241227	21	44951	0.000128929	1.17606e-05	0.00019666	0.13792	0.060203	0.0418863
2	241227	22	40352	0.000100158	1.11403e-05	0.000423615	0.112847	0.671273	0.437327
2	241227	2	241227	0.000502358	8.12859e-06	2.05291e-07	1	0	0
3	212650	10	152196	0.000104719	8.34611e-06	0.000116088	0.154276	0.478907	0.381739
3	212650	11	151749	9.5095e-05	1.07494e-05	0.00045073	0.111551	0.172874	0.276949
3	212650	12	139683	0.000104596	8.48412e-06	0.00012436	0.151947	0.502515	0.388719
3	212650	13	113390	8.76254e-05	9.65835e-06	0.000409102	0.113491	0.0760418	0.104928
3	212650	14	97332	0.000111113	1.01537e-05	0.000198042	0.137576	0.153767	0.210758
3	212650	15	85307	9.13165e-05	9.61184e-06	0.000342558	0.118954	0.106677	0.163643
3	212650	16	91974	9.55294e-05	8.9235e-06	0.000215707	0.132996	0.182524	0.253293
3	212650	17	79445	0.000114083	1.06831e-05	0.0002178	0.134937	0.119555	0.161075
3	212650	18	87103	0.000108403	9.65537e-06	0.000179227	0.140605	0.213002	0.272628
3	212650	19	72788	0.000125714	1.0693e-05	0.000149733	0.14869	0.0670306	0.0453949
3	212650	1	225956	0.000102613	6.42706e-06	4.49874e-05	0.188076	2.07582	0.466082
3	212650	20	68815	9.59586e-05	1.14385e-05	0.000552331	0.106579	0.200762	0.311807
3	212650	21	44951	9.96379e-05	1.31238e-05	0.000807285	0.0974199	0.534383	0.432105
3	212650	22	40352	0.000111914	1.2439e-05	0.00042245	0.11525	0.145016	0.235629
3	212650	2	241227	0.000118206	6.42166e-06	2.56243e-05	0.216856	0.0859211	0.0325431
3	212650	3	212650	0.000601078	1.01331e-05	2.41847e-07	1	0	0
4	222219	10	152196	0.000118088	8.48368e-06	7.72389e-05	0.171626	0.0905734	0.0655054
4	222219	11	151749	0.00010168	1.09222e-05	0.000370455	0.117667	3.66786	0.487972
4	222219	12	139683	0.000103883	8.62083e-06	0.000135976	0.148876	0.692851	0.420188
4	222219	13	113390	8.6848e-05	9.81419e-06	0.000450199	0.110967	0.071678	0.0982533
4	222219	14	97332	7.73545e-05	1.03225e-05	0.000848104	0.0944859	0.039456	0.0373919
4	222219	15	85307	0.000111192	9.7664e-06	0.000169729	0.142891	0.152288	0.200608
4	222219	16	91974	0.000108441	9.0673e-06	0.000140052	0.148935	0.210638	0.259271
4	222219	17	79445	0.000105903	1.08541e-05	0.000309055	0.123572	0.34631	0.369625
4	222219	18	87103	8.55635e-05	9.81341e-06	0.00047653	0.109484	0.0651897	0.0841802
4	222219	19	72788	0.000115165	1.08615e-05	0.000223908	0.134376	0.11107	0.146477
4	222219	1	225956	0.000109421	6.53151e-06	3.71983e-05	0.19785	0.174778	0.160447
4	222219	20	68815	0.000132835	1.16309e-05	0.000167669	0.145546	0.0548352	0.0283648
4	222219	21	44951	0.000105312	1.33354e-05	0.000695303	0.101579	0.412785	0.408866
4	222219	22	40352	0.000109044	1.26391e-05	0.000496191	0.110779	0.199619	0.304248
4	222219	2	241227	9.61732e-05	6.52144e-06	6.15292e-05	0.174055	0.193746	0.209889
4	222219	3	212650	9.98061e-05	7.28072e-06	8.20234e-05	0.165097	0.540391	0.387607
4	222219	4	222219	0.000617295	1.04624e-05	2.4708e-07	1	0	0
5	193604	10	152196	9.88118e-05	9.09713e-06	0.00020387	0.13536	0.382566	0.370667
5	193604	11	151749	0.000123195	1.17201e-05	0.000231591	0.134375	0.0743369	0.0724718
5	193604	12	139683	0.000114009	9.24904e-06	0.000124431	0.154003	0.118845	0.132375
5	193604	13	113390	0.000102285	1.0525e-05	0.000313837	0.123185	5.08275	0.490913
5	193604	14	97332	0.000109718	1.10669e-05	0.000290555	0.126318	0.181828	0.262739
5	193604	15	85307	0.000110994	1.04762e-05	0.00022458	0.134443	0.157094	0.220169
5	193604	16	91974	9.43831e-05	9.72654e-06	0.000315673	0.122182	0.155373	0.237809
5	193604	17	79445	0.0001242	1.16473e-05	0.000219019	0.136597	0.0716825	0.0647017
5	193604	18	87103	0.000100383	1.05237e-05	0.000337285	0.121068	0.773204	0.441581
5	193604	19	72788	0.000104963	1.16493e-05	0.000420078	0.115437	0.458546	0.406822
5	193604	1	225956	0.000107549	7.00581e-06	5.25222e-05	0.183294	0.232644	0.237418
5	193604	20	68815	9.72604e-05	1.24675e-05	0.000728388	0.100446	0.262529	0.360735
5	193604	21	44951	0.000103371	1.43046e-05	0.000972607	0.0939786	1.00314	0.464933
5	193604	22	40352	8.80355e-05	1.35589e-05	0.00145094	0.0842989	0.0816459	0.180088
5	193604	2	241227	0.000120973	7.00019e-06	3.28989e-05	0.206361	0.0760892	0.0267108
5	193604	3	212650	9.8856e-05	7.81003e-06	0.000112166	0.154131	0.379196	0.352603
5	193604	4	222219	0.000119235	7.93962e-06	5.72761e-05	0.183398	0.0845116	0.0479001
5	193604	5	193604	0.000694928	1.20387e-05	2.69656e-07	1	0	0
6	206161	10	152196	0.00010576	1.13447e-05	0.000368471	0.119184	0.36249	0.379403
6	206161	11	151749	0.000100923	1.46109e-05	0.00115213	0.0905576	1.19445	0.471603
6	206161	12	139683	0.0001105	1.15328e-05	0.000331531	0.122789	0.167179	0.251695
6	206161	13	113390	9.31419e-05	1.3126e-05	0.00104149	0.0922781	0.136251	0.267693
6	206161	14	97332	9.7655e-05	1.38007e-05	0.00105251	0.09249	0.291717	0.383531
6	206161	15	85307	0.000108039	1.30638e-05	0.000583303	0.107654	0.234061	0.334725
6	206161	16	91974	0.000108933	1.21293e-05	0.00042536	0.116006	0.203831	0.299852
6	206161	17	79445	0.000103098	1.45195e-05	0.00103892	0.0932779	1.26882	0.472463
6	206161	18	87103	8.74091e-05	1.31255e-05	0.00132048	0.0867236	0.0778213	0.163775
6	206161	19	72788	0.000104019	1.45274e-05	0.00100684	0.0941091	0.687498	0.448867
6	206161	1	225956	0.000118955	8.73954e-06	8.43484e-05	0.166777	0.0860204	0.0622743
6	206161	20	68815	0.000113864	1.55486e-05	0.000925104	0.0967374	0.127085	0.24447
6	206161	21	44951	0.000100628	1.78389e-05	0.00243105	0.0752598	0.95731	0.470557
6	206161	22	40352	0.00012996	1.69118e-05	0.000771132	0.102373	0.0619355	0.0868474
6	206161	2	241227	9.95643e-05	8.7232e-06	0.000168076	0.139719	0.494217	0.395713
6	206161	3	212650	0.000103475	9.73949e-06	0.000222178	0.13272	0.894843	0.444635
6	206161	4	222219	9.76703e-05	9.89665e-06	0.00029571	0.123585	0.2805	0.341138
6	206161	5	193604	0.000112414	1.06169e-05	0.00022513	0.134069	0.137041	0.191655
6	206161	6	206161	0.00102409	1.87223e-05	3.34376e-07	1	0	0
7	177388	10	152196	9.42673e-05	9.32914e-06	0.000269901	0.126408	0.151876	0.226019
7	177388	11	151749	0.000120476	1.20172e-05	0.000278263	0.128634	0.0837415	0.0996602
7	177388	12	139683	0.00010463	9.4828e-06	0.000191794	0.138348	0.504731	0.398789
7	177388	13	113390	0.00012179	1.07965e-05	0.000175953	0.143576	0.0783692	0.0704458
7	177388	14	97332	9.50303e-05	1.13484e-05	0.000556173	0.107098	0.173604	0.285338
7	177388	15	85307	9.37748e-05	1.07426e-05	0.000474391	0.111187	0.144656	0.24249
7	177388	16	91974	0.000106912	9.97362e-06	0.000214609	0.135477	0.276797	0.325076
7	177388	17	79445	0.00013055	1.19462e-05	0.000199098	0.140548	0.0587687	0.037521
7	177388	18	87103	0.000105072	1.07916e-05	0.000311581	0.124047	0.440131	0.396023
7	177388	19	72788	0.000116451	1.19474e-05	0.000310289	0.125366	0.103818	0.146867
7	177388	1	225956	0.000105772	7.18381e-06	6.19182e-05	0.176458	0.338771	0.314978
7	177388	20	68815	0.000113195	1.27856e-05	0.000449395	0.114434	0.131017	0.215865
7	177388	21	44951	0.000130236	1.46742e-05	0.000445169	0.115903	0.0602308	0.0633212
7	177388	22	40352	0.000110564	1.39029e-05	0.000677073	0.103636	0.168818	0.286242
7	177388	2	241227	0.000105653	7.17307e-06	6.18282e-05	0.176422	0.349309	0.320037
7	177388	3	212650	0.000112934	8.01013e-06	7.34449e-05	0.172362	0.126556	0.122435
7	177388	4	222219	0.000107124	8.13802e-06	9.61866e-05	0.161291	0.257641	0.282623
7	177388	5	193604	9.48191e-05	8.72984e-06	0.000203897	0.134562	0.162864	0.227554
7	177388	6	206161	0.000104426	1.0886e-05	0.000330013	0.121913	0.553957	0.418294
7	177388	7	177388	0.000725483	1.26591e-05	2.77551e-07	1	0	0
8	163436	10	152196	9.20185e-05	9.49798e-06	0.000317622	0.12153	0.115252	0.175575
8	163436	11	151749	0.000100937	1.22312e-05	0.000588073	0.106145	1.18774	0.466543
8	163436	12	139683	0.000110995	9.65479e-06	0.000163412	0.144549	0.155637	0.202792
8	163436	13	113390	0.000124858	1.09925e-05	0.000171291	0.144971	0.0697178	0.0530473
8	163436	14	97332	0.000103512	1.15528e-05	0.000429218	0.114896	0.89571	0.452062
8	163436	15	85307	0.000124036	1.09404e-05	0.000172534	0.144847	0.071924	0.0571452
8	163436	16	91974	0.000104353	1.01535e-05	0.000252722	0.130239	0.569421	0.415152
8	163436	17	79445	9.80487e-05	1.21548e-05	0.000641379	0.103964	0.317357	0.379824
8	163436	18	87103	0.000102042	1.09863e-05	0.000373743	0.118651	112.412	0.499604
8	163436	19	72788	0.000114851	1.21627e-05	0.000350684	0.121777	0.115492	0.175584
8	163436	1	225956	0.000104764	7.31341e-06	6.89878e-05	0.172138	0.460513	0.363762
8	163436	20	68815	0.000104216	1.30154e-05	0.000659707	0.103767	0.617837	0.437386
8	163436	21	44951	0.000100087	1.49334e-05	0.00128944	0.0877269	0.673963	0.451359
8	163436	22	40352	0.000114435	1.41545e-05	0.000635937	0.105645	0.12052	0.215103
8	163436	2	241227	0.00012167	7.30783e-06	3.8121e-05	0.200101	0.0742899	0.0272295
8	163436	3	212650	0.000103736	8.15323e-06	0.000109911	0.155935	0.745254	0.422243
8	163436	4	222219	0.000103549	8.28464e-06	0.000117849	0.153554	0.837789	0.431745
8	163436	5	193604	9.07943e-05	8.88829e-06	0.000258768	0.126906	0.100339	0.137311
8	163436	6	206161	0.000100046	1.10825e-05	0.000417026	0.115036	0.642332	0.433286
8	163436	7	177388	0.000113507	9.11443e-06	0.000119539	0.155301	0.123277	0.138121
8	163436	8	163436	0.000748198	1.31203e-05	2.83102e-07	1	0	0
9	129405	10	152196	9.27233e-05	9.42708e-06	0.000299588	0.123395	0.124949	0.189636
9	129405	11	151749	7.27956e-05	1.21473e-05	0.00194993	0.0771359	0.0319932	0.0367373
9	129405	12	139683	9.90505e-05	9.58211e-06	0.000247125	0.129979	0.417947	0.385669
9	129405	13	113390	9.22392e-05	1.09067e-05	0.000535549	0.107916	0.12018	0.209988
9	129405	14	97332	0.000114551	1.14682e-05	0.000282249	0.128119	0.11731	0.168071
9	129405	15	85307	8.79419e-05	1.08563e-05	0.000631212	0.103481	0.0796988	0.131974
9	129405	16	91974	0.00010762	1.00781e-05	0.000217818	0.135342	0.244001	0.304334
9	129405	17	79445	0.000106089	1.20643e-05	0.000461206	0.113349	0.336889	0.376718
9	129405	18	87103	0.000102243	1.09044e-05	0.000360384	0.119793	6.1451	0.49269
9	129405	19	72788	0.000108372	1.2071e-05	0.000425929	0.115785	0.220372	0.313539
9	129405	1	225956	0.000101648	7.25882e-06	7.54326e-05	0.168294	3.1985	0.48028
9	129405	20	68815	0.000100298	1.29184e-05	0.000741684	0.100628	0.750547	0.44991
9	129405	21	44951	6.0293e-05	1.48343e-05	0.00764637	0.0532508	0.01888	0.0239022
9	129405	22	40352	0.000112343	1.40487e-05	0.000662998	0.104505	0.142346	0.251783
9	129405	2	241227	0.000109446	7.24876e-06	5.60766e-05	0.181371	0.177233	0.181996
9	129405	3	212650	0.000111988	8.09371e-06	7.90778e-05	0.169624	0.13781	0.142903
9	129405	4	222219	0.00010143	8.22289e-06	0.000124098	0.151559	2.07494	0.472639
9	129405	5	193604	0.000102239	8.82062e-06	0.00015827	0.143993	6.08342	0.491125
9	129405	6	206161	9.93264e-05	1.1e-05	0.00041661	0.11508	0.468134	0.408957
9	129405	7	177388	8.47214e-05	9.04846e-06	0.000362345	0.116801	0.0609901	0.0639966
9	129405	8	163436	0.000114708	9.21015e-06	0.0001195	0.155756	0.113085	0.120228
9	129405	9	129405	0.000738606	1.29256e-05	2.8079e-07	1	0	0

## Sheet: CHB
unscale:	chr1	chr2	chr3	chr4	chr5	chr6	chr7	chr8	chr9	chr10	chr11	chr12	chr13	chr14	chr15	chr16	chr17	chr18	chr19	chr20	chr21	chr22
chr1	0.000492815	0.000100238	9.52211e-05	9.34575e-05	9.81424e-05	9.73894e-05	0.000106978	0.000101807	9.67223e-05	8.32745e-05	9.17748e-05	0.000101209	9.32935e-05	8.3891e-05	9.5417e-05	8.88939e-05	0.000106114	0.000111842	9.50436e-05	8.38377e-05	9.64788e-05	0.000102775
chr2	0.000100238	0.000500042	9.43788e-05	8.8401e-05	0.000100131	9.28674e-05	0.000103636	0.000101253	0.000103295	9.00086e-05	7.78302e-05	0.000112254	9.80238e-05	0.000101533	0.000102664	9.88675e-05	9.6342e-05	9.18271e-05	9.76219e-05	0.000100156	0.000107575	0.000105165
chr3	9.52211e-05	9.43788e-05	0.000582504	8.57323e-05	0.000102083	9.8909e-05	8.95287e-05	9.03358e-05	9.50867e-05	0.000101777	9.56806e-05	9.00575e-05	9.89167e-05	0.000102943	0.000100913	9.12682e-05	9.52972e-05	9.43917e-05	0.000103396	0.00011569	8.65466e-05	0.00010334
chr4	9.34575e-05	8.8401e-05	8.57323e-05	0.000607853	9.23659e-05	0.00010106	9.55364e-05	8.76037e-05	9.35255e-05	9.65589e-05	8.95119e-05	8.60184e-05	9.74442e-05	7.99294e-05	7.99804e-05	0.000105718	8.21848e-05	8.82591e-05	9.99539e-05	9.05903e-05	8.63915e-05	8.99605e-05
chr5	9.81424e-05	0.000100131	0.000102083	9.23659e-05	0.000703277	8.33871e-05	9.99903e-05	8.93559e-05	0.000102118	0.00010029	5.4675e-05	9.50144e-05	7.96171e-05	8.73008e-05	9.31137e-05	9.99196e-05	0.00011171	7.54127e-05	0.000103358	9.67855e-05	9.85926e-05	9.39949e-05
chr6	9.73894e-05	9.28674e-05	9.8909e-05	0.00010106	8.33871e-05	0.000899308	9.01063e-05	0.000100877	0.000106515	0.000103718	9.80186e-05	9.80599e-05	7.67806e-05	9.97211e-05	0.000107772	9.46647e-05	0.000105015	9.44482e-05	8.97237e-05	0.000108097	9.01798e-05	9.13395e-05
chr7	0.000106978	0.000103636	8.95287e-05	9.55364e-05	9.99903e-05	9.01063e-05	0.000707156	0.000105197	9.18878e-05	9.62684e-05	0.000115205	0.00010729	9.54191e-05	0.00011269	9.27378e-05	9.86722e-05	0.000104846	9.79887e-05	9.09827e-05	9.73443e-05	8.09439e-05	9.00815e-05
chr8	0.000101807	0.000101253	9.03358e-05	8.76037e-05	8.93559e-05	0.000100877	0.000105197	0.00069185	8.96799e-05	7.66616e-05	0.000129394	8.54558e-05	9.87984e-05	9.96324e-05	0.000103764	9.48769e-05	8.75848e-05	9.58725e-05	9.12181e-05	0.000113701	9.65968e-05	9.35156e-05
chr9	9.67223e-05	0.000103295	9.50867e-05	9.35255e-05	0.000102118	0.000106515	9.18878e-05	8.96799e-05	0.000737091	9.00942e-05	8.72941e-05	0.000100348	9.32975e-05	8.6522e-05	0.000100371	0.000103523	6.53572e-05	9.99793e-05	9.21281e-05	9.52349e-05	9.34548e-05	9.79552e-05
chr10	8.32745e-05	9.00086e-05	0.000101777	9.65589e-05	0.00010029	0.000103718	9.62684e-05	7.66616e-05	9.00942e-05	0.000796984	9.79935e-05	0.000100284	9.07626e-05	9.83616e-05	9.8603e-05	0.000100422	9.09754e-05	9.85595e-05	7.92639e-05	8.57218e-05	0.000100315	7.76294e-05
chr11	9.17748e-05	7.78302e-05	9.56806e-05	8.95119e-05	5.4675e-05	9.80186e-05	0.000115205	0.000129394	8.72941e-05	9.79935e-05	0.00120933	8.3023e-05	8.41547e-05	9.17458e-05	0.000130905	9.44023e-05	8.38283e-05	8.84989e-05	9.30689e-05	9.9001e-05	9.65803e-05	8.5228e-05
chr12	0.000101209	0.000112254	9.00575e-05	8.60184e-05	9.50144e-05	9.80599e-05	0.00010729	8.54558e-05	0.000100348	0.000100284	8.3023e-05	0.000734653	9.97742e-05	9.63048e-05	0.000106417	9.52514e-05	9.90218e-05	9.07678e-05	9.35975e-05	7.92555e-05	6.70573e-05	6.70774e-05
chr13	9.32935e-05	9.80238e-05	9.89167e-05	9.74442e-05	7.96171e-05	7.67806e-05	9.54191e-05	9.87984e-05	9.32975e-05	9.07626e-05	8.41547e-05	9.97742e-05	0.00093908	9.37628e-05	9.94325e-05	9.82347e-05	9.28531e-05	8.89516e-05	8.78477e-05	8.82914e-05	7.15296e-05	9.97988e-05
chr14	8.3891e-05	0.000101533	0.000102943	7.99294e-05	8.73008e-05	9.97211e-05	0.00011269	9.96324e-05	8.6522e-05	9.83616e-05	9.17458e-05	9.63048e-05	9.37628e-05	0.00103969	9.22011e-05	9.50866e-05	9.24852e-05	9.18311e-05	0.000104886	6.4059e-05	0.000118714	6.63741e-05
chr15	9.5417e-05	0.000102664	0.000100913	7.99804e-05	9.31137e-05	0.000107772	9.27378e-05	0.000103764	0.000100371	9.8603e-05	0.000130905	0.000106417	9.94325e-05	9.22011e-05	0.000982873	8.87353e-05	9.30194e-05	9.41262e-05	6.97196e-05	0.00010429	6.67923e-05	9.74155e-05
chr16	8.88939e-05	9.88675e-05	9.12682e-05	0.000105718	9.99196e-05	9.46647e-05	9.86722e-05	9.48769e-05	0.000103523	0.000100422	9.44023e-05	9.52514e-05	9.82347e-05	9.50866e-05	8.87353e-05	0.000843319	0.000115462	9.77665e-05	9.27088e-05	0.000119575	7.19696e-05	8.92711e-05
chr17	0.000106114	9.6342e-05	9.52972e-05	8.21848e-05	0.00011171	0.000105015	0.000104846	8.75848e-05	6.53572e-05	9.09754e-05	8.38283e-05	9.90218e-05	9.28531e-05	9.24852e-05	9.30194e-05	0.000115462	0.00113606	0.000116434	8.67203e-05	9.28522e-05	7.87169e-05	8.59732e-05
chr18	0.000111842	9.18271e-05	9.43917e-05	8.82591e-05	7.54127e-05	9.44482e-05	9.79887e-05	9.58725e-05	9.99793e-05	9.85595e-05	8.84989e-05	9.07678e-05	8.89516e-05	9.18311e-05	9.41262e-05	9.77665e-05	0.000116434	0.000945257	0.000107362	0.000117512	6.94571e-05	9.06742e-05
chr19	9.50436e-05	9.76219e-05	0.000103396	9.99539e-05	0.000103358	8.97237e-05	9.09827e-05	9.12181e-05	9.21281e-05	7.92639e-05	9.30689e-05	9.35975e-05	8.78477e-05	0.000104886	6.97196e-05	9.27088e-05	8.67203e-05	0.000107362	0.00117295	9.36384e-05	6.23253e-05	0.000105104
chr20	8.38377e-05	0.000100156	0.00011569	9.05903e-05	9.67855e-05	0.000108097	9.73443e-05	0.000113701	9.52349e-05	8.57218e-05	9.9001e-05	7.92555e-05	8.82914e-05	6.4059e-05	0.00010429	0.000119575	9.28522e-05	0.000117512	9.36384e-05	0.00149311	8.54698e-05	0.000117628
chr21	9.64788e-05	0.000107575	8.65466e-05	8.63915e-05	9.85926e-05	9.01798e-05	8.09439e-05	9.65968e-05	9.34548e-05	0.000100315	9.65803e-05	6.70573e-05	7.15296e-05	0.000118714	6.67923e-05	7.19696e-05	7.87169e-05	6.94571e-05	6.23253e-05	8.54698e-05	0.00172298	9.85186e-05
chr22	0.000102775	0.000105165	0.00010334	8.99605e-05	9.39949e-05	9.13395e-05	9.00815e-05	9.35156e-05	9.79552e-05	7.76294e-05	8.5228e-05	6.70774e-05	9.97988e-05	6.63741e-05	9.74155e-05	8.92711e-05	8.59732e-05	9.06742e-05	0.000105104	0.000117628	9.85186e-05	0.0016038
scale:	chr1	chr2	chr3	chr4	chr5	chr6	chr7	chr8	chr9	chr10	chr11	chr12	chr13	chr14	chr15	chr16	chr17	chr18	chr19	chr20	chr21	chr22
chr1	1	0.203683	0.17925	0.172164	0.168077	0.147349	0.182763	0.175919	0.162057	0.134029	0.119744	0.169793	0.138409	0.118313	0.138546	0.139414	0.143253	0.165613	0.126315	0.0986573	0.105858	0.117032
chr2	0.203683	1	0.176314	0.161612	0.17018	0.139439	0.175708	0.173633	0.171755	0.143767	0.100778	0.186891	0.144321	0.142107	0.147936	0.153878	0.129073	0.134943	0.128756	0.116965	0.117136	0.118844
chr3	0.17925	0.176314	1	0.1452	0.160732	0.137583	0.140621	0.143513	0.146472	0.150603	0.114775	0.138904	0.13492	0.133477	0.134713	0.131598	0.118278	0.128505	0.126336	0.125164	0.0873044	0.108188
chr4	0.172164	0.161612	0.1452	1	0.142319	0.137567	0.146846	0.136194	0.140984	0.139822	0.105077	0.129834	0.130066	0.10142	0.104484	0.14917	0.0998208	0.117584	0.119517	0.0959112	0.0852827	0.0921648
chr5	0.168077	0.17018	0.160732	0.142319	1	0.105525	0.142881	0.129146	0.143109	0.13501	0.0596675	0.133324	0.0987957	0.102981	0.113085	0.131071	0.126137	0.0934022	0.114894	0.0952623	0.090481	0.0895243
chr6	0.147349	0.139439	0.137583	0.137567	0.105525	1	0.11375	0.128806	0.131873	0.123352	0.0945019	0.121561	0.0841717	0.103922	0.115632	0.109705	0.104757	0.103345	0.0881133	0.0939952	0.0731147	0.076856
chr7	0.182763	0.175708	0.140621	0.146846	0.142881	0.11375	1	0.151672	0.128459	0.129281	0.125419	0.150184	0.118116	0.132608	0.112354	0.12912	0.1181	0.121069	0.100891	0.0955793	0.0741037	0.0855883
chr8	0.175919	0.173633	0.143513	0.136194	0.129146	0.128806	0.151672	1	0.126807	0.104129	0.142478	0.120989	0.123699	0.118584	0.127152	0.125574	0.0997853	0.11981	0.10231	0.112917	0.089446	0.0898681
chr9	0.162057	0.171755	0.146472	0.140984	0.143109	0.131873	0.128459	0.126807	1	0.118657	0.0932017	0.137759	0.113264	0.0998518	0.119258	0.132857	0.0721998	0.121147	0.100192	0.0917057	0.0839082	0.0912754
chr10	0.134029	0.143767	0.150603	0.139822	0.13501	0.123352	0.129281	0.104129	0.118657	1	0.100504	0.132247	0.105846	0.109043	0.112542	0.123799	0.0965408	0.114722	0.0828061	0.0792934	0.0865192	0.069486
chr11	0.119744	0.100778	0.114775	0.105077	0.0596675	0.0945019	0.125419	0.142478	0.0932017	0.100504	1	0.0887554	0.0795586	0.0824522	0.121122	0.0943442	0.072114	0.0835077	0.0788194	0.0742381	0.0675271	0.0618436
chr12	0.169793	0.186891	0.138904	0.129834	0.133324	0.121561	0.150184	0.120989	0.137759	0.132247	0.0887554	1	0.121282	0.111284	0.126605	0.122398	0.109529	0.110126	0.101921	0.0764166	0.0602846	0.0625835
chr13	0.138409	0.144321	0.13492	0.130066	0.0987957	0.0841717	0.118116	0.123699	0.113264	0.105846	0.0795586	0.121282	1	0.095814	0.104611	0.11163	0.0908256	0.0954389	0.0845944	0.0752815	0.0568667	0.0823419
chr14	0.118313	0.142107	0.133477	0.10142	0.102981	0.103922	0.132608	0.118584	0.0998518	0.109043	0.0824522	0.111284	0.095814	1	0.0922132	0.102717	0.0859985	0.0936632	0.0960145	0.0519227	0.0897187	0.0520597
chr15	0.138546	0.147936	0.134713	0.104484	0.113085	0.115632	0.112354	0.127152	0.119258	0.112542	0.121122	0.126605	0.104611	0.0922132	1	0.0986893	0.089052	0.0988419	0.0657089	0.0870301	0.0519705	0.0786651
chr16	0.139414	0.153878	0.131598	0.14917	0.131071	0.109705	0.12912	0.125574	0.132857	0.123799	0.0943442	0.122398	0.11163	0.102717	0.0986893	1	0.119392	0.110888	0.0943747	0.107779	0.0604846	0.0778629
chr17	0.143253	0.129073	0.118278	0.0998208	0.126137	0.104757	0.1181	0.0997853	0.0721998	0.0965408	0.072114	0.109529	0.0908256	0.0859985	0.089052	0.119392	1	0.113677	0.0759892	0.0720415	0.0569456	0.0645474
chr18	0.165613	0.134943	0.128505	0.117584	0.0934022	0.103345	0.121069	0.11981	0.121147	0.114722	0.0835077	0.110126	0.0954389	0.0936632	0.0988419	0.110888	0.113677	1	0.103191	0.100007	0.0551149	0.0746724
chr19	0.126315	0.128756	0.126336	0.119517	0.114894	0.0881133	0.100891	0.10231	0.100192	0.0828061	0.0788194	0.101921	0.0845944	0.0960145	0.0657089	0.0943747	0.0759892	0.103191	1	0.0715227	0.0443871	0.0776844
chr20	0.0986573	0.116965	0.125164	0.0959112	0.0952623	0.0939952	0.0955793	0.112917	0.0917057	0.0792934	0.0742381	0.0764166	0.0752815	0.0519227	0.0870301	0.107779	0.0720415	0.100007	0.0715227	1	0.0538969	0.0769813
chr21	0.105858	0.117136	0.0873044	0.0852827	0.090481	0.0731147	0.0741037	0.089446	0.0839082	0.0865192	0.0675271	0.0602846	0.0568667	0.0897187	0.0519705	0.0604846	0.0569456	0.0551149	0.0443871	0.0538969	1	0.0601167
chr22	0.117032	0.118844	0.108188	0.0921648	0.0895243	0.076856	0.0855883	0.0898681	0.0912754	0.069486	0.0618436	0.0625835	0.0823419	0.0520597	0.0786651	0.0778629	0.0645474	0.0746724	0.0776844	0.0769813	0.0601167	1
raw result:
Tagi	SNPi	Tagj	SNPj	rsq	sd	pval	rsq_s	sd_s	pval_s
10	152196	10	152196	0.000796984	1.37119e-05	2.62332e-07	1	0	0
11	151750	10	152196	9.79935e-05	1.22136e-05	0.000654662	0.100504	0.328738	0.387532
11	151750	11	151750	0.00120933	2.17577e-05	3.1366e-07	1	0	0
12	139684	10	152196	0.000100284	9.25614e-06	0.000205896	0.132247	0.203175	0.275304
12	139684	11	151750	8.3023e-05	1.16603e-05	0.00102827	0.0887554	0.0920773	0.194835
12	139684	12	139684	0.000734653	1.24956e-05	2.50604e-07	1	0	0
13	113388	10	152196	9.07626e-05	1.0631e-05	0.000516516	0.105846	0.321764	0.379346
13	113388	11	151750	8.41547e-05	1.33922e-05	0.00163771	0.0795586	0.105424	0.246226
13	113388	12	139684	9.97742e-05	1.01488e-05	0.000300142	0.121282	0.223181	0.307852
13	113388	13	113388	0.00093908	1.64845e-05	2.84264e-07	1	0	0
14	97334	10	152196	9.83616e-05	1.12463e-05	0.000470892	0.109043	0.29895	0.36688
14	97334	11	151750	9.17458e-05	1.41665e-05	0.00146476	0.0824522	0.464659	0.43389
14	97334	12	139684	9.63048e-05	1.07358e-05	0.000427288	0.111284	0.584149	0.429095
14	97334	13	113388	9.37628e-05	1.23308e-05	0.000802574	0.095814	2.37802	0.484896
14	97334	14	97334	0.00103969	1.84476e-05	2.96728e-07	1	0	0
15	85307	10	152196	9.8603e-05	1.09031e-05	0.000414162	0.112542	0.282496	0.355348
15	85307	11	151750	0.000130905	1.37435e-05	0.000339183	0.121122	0.0453338	0.0278515
15	85307	12	139684	0.000106417	1.04096e-05	0.000257984	0.126605	0.108357	0.153766
15	85307	13	113388	9.94325e-05	1.19548e-05	0.000570747	0.104611	0.241746	0.34376
15	85307	14	97334	9.22011e-05	1.26464e-05	0.000940702	0.0922132	0.566504	0.439294
15	85307	15	85307	0.000982873	1.7339e-05	2.89953e-07	1	0	0
16	91982	10	152196	0.000100422	1.00107e-05	0.000277603	0.123799	0.201096	0.285723
16	91982	11	151750	9.44023e-05	1.26097e-05	0.000851219	0.0943442	8.33407	0.495755
16	91982	12	139684	9.52514e-05	9.55604e-06	0.000284548	0.122398	1.1793	0.461166
16	91982	13	113388	9.82347e-05	1.09759e-05	0.000431045	0.11163	0.308217	0.367771
16	91982	14	97334	9.50866e-05	1.1611e-05	0.00060553	0.102717	1.4421	0.473318
16	91982	15	85307	8.87353e-05	1.12569e-05	0.000700168	0.0986893	0.201088	0.324646
16	91982	16	91982	0.000843319	1.4616e-05	2.70144e-07	1	0	0
17	79448	10	152196	9.09754e-05	1.18055e-05	0.000762986	0.0965408	0.347018	0.397323
17	79448	11	151750	8.38283e-05	1.48717e-05	0.00243756	0.072114	0.102797	0.260824
17	79448	12	139684	9.90218e-05	1.12699e-05	0.000462671	0.109529	0.259191	0.347164
17	79448	13	113388	9.28531e-05	1.29441e-05	0.000999884	0.0908256	0.835885	0.459353
17	79448	14	97334	9.24852e-05	1.36932e-05	0.00125285	0.0859985	0.663655	0.451576
17	79448	15	85307	9.30194e-05	1.32753e-05	0.001092	0.089052	0.953258	0.465032
17	79448	16	91982	0.000115462	1.21919e-05	0.00034677	0.119392	0.0685942	0.0783687
17	79448	17	79448	0.00113606	2.0328e-05	3.06883e-07	1	0	0
18	87103	10	152196	9.85595e-05	1.06699e-05	0.000381746	0.114722	0.284662	0.353776
18	87103	11	151750	8.84989e-05	1.34406e-05	0.00137737	0.0835077	0.194825	0.345134
18	87103	12	139684	9.07678e-05	1.01856e-05	0.000438271	0.110126	0.321226	0.374492
18	87103	13	113388	8.89516e-05	1.16991e-05	0.000802819	0.0954389	0.210339	0.336773
18	87103	14	97334	9.18311e-05	1.23759e-05	0.000880296	0.0936632	0.477321	0.426999
18	87103	15	85307	9.41262e-05	1.19982e-05	0.000713029	0.0988419	8.89382	0.495833
18	87103	16	91982	9.77665e-05	1.1016e-05	0.000445203	0.110888	0.348313	0.383071
18	87103	17	79448	0.000116434	1.29949e-05	0.0004292	0.113677	0.0665622	0.0814267
18	87103	18	87103	0.000945257	1.6605e-05	2.85093e-07	1	0	0
19	72794	10	152196	7.92639e-05	1.20144e-05	0.00136732	0.0828061	0.0663141	0.139934
19	72794	11	151750	9.30689e-05	1.5132e-05	0.00177247	0.0788194	1.00167	0.47053
19	72794	12	139684	9.35975e-05	1.14675e-05	0.00061331	0.101921	1.76523	0.478363
19	72794	13	113388	8.78477e-05	1.31715e-05	0.00131313	0.0845944	0.173765	0.325925
19	72794	14	97334	0.000104886	1.39342e-05	0.000833935	0.0960145	0.125879	0.244056
19	72794	15	85307	6.97196e-05	1.35126e-05	0.00334991	0.0657089	0.0361475	0.0716212
19	72794	16	91982	9.27088e-05	1.24023e-05	0.00085612	0.0943747	0.754738	0.453261
19	72794	17	79448	8.67203e-05	1.46268e-05	0.0020279	0.0759892	0.147413	0.316697
19	72794	18	87103	0.000107362	1.32205e-05	0.000625233	0.103191	0.104092	0.188817
19	72794	19	72794	0.00117295	2.10479e-05	3.10387e-07	1	0	0
1	225949	10	152196	8.32745e-05	7.30343e-06	0.000168746	0.134029	0.0890519	0.103379
1	225949	11	151750	9.17748e-05	9.19803e-06	0.000283445	0.119744	0.443254	0.400206
1	225949	12	139684	0.000101209	6.97116e-06	6.5441e-05	0.169793	0.170271	0.187554
1	225949	13	113388	9.32935e-05	8.00615e-06	0.000155018	0.138409	1.14704	0.454887
1	225949	14	97334	8.3891e-05	8.47066e-06	0.000291723	0.118313	0.0966153	0.143959
1	225949	15	85307	9.5417e-05	8.21104e-06	0.0001567	0.138546	0.982919	0.44736
1	225949	16	91982	8.88939e-05	7.53911e-06	0.000148037	0.139414	0.195855	0.257944
1	225949	17	79448	0.000106114	8.89214e-06	0.000141254	0.143253	0.107405	0.126579
1	225949	18	87103	0.000111842	8.03901e-06	7.73936e-05	0.165613	0.0756194	0.0468412
1	225949	19	72794	9.50436e-05	9.04669e-06	0.000232061	0.126315	1.45755	0.467552
1	225949	1	225949	0.000492815	7.77679e-06	1.85723e-07	1	0	0
20	68804	10	152196	8.57218e-05	1.36802e-05	0.00165485	0.0792934	0.127039	0.283176
20	68804	11	151750	9.9001e-05	1.7232e-05	0.00227465	0.0742381	0.269802	0.398412
20	68804	12	139684	7.92555e-05	1.30605e-05	0.00186228	0.0764166	0.0664927	0.157249
20	68804	13	113388	8.82914e-05	1.49993e-05	0.00208197	0.0752815	0.189189	0.355507
20	68804	14	97334	6.4059e-05	1.58725e-05	0.00782888	0.0519227	0.0272609	0.0647704
20	68804	15	85307	0.00010429	1.53836e-05	0.00123558	0.0870301	0.133466	0.274962
20	68804	16	91982	0.000119575	1.41278e-05	0.000533927	0.107779	0.0600933	0.0736722
20	68804	17	79448	9.28522e-05	1.66562e-05	0.00253741	0.0720415	0.852607	0.468361
20	68804	18	87103	0.000117512	1.50572e-05	0.000727243	0.100007	0.0647174	0.0985838
20	68804	19	72794	9.36384e-05	1.69485e-05	0.00262101	0.0715227	1.95133	0.486259
20	68804	1	225949	8.38377e-05	1.03031e-05	0.000620488	0.0986573	0.0975043	0.184427
20	68804	20	68804	0.00149311	2.72951e-05	3.34286e-07	1	0	0
21	44957	10	152196	0.000100315	1.47611e-05	0.00122437	0.0865192	0.210907	0.351331
21	44957	11	151750	9.65803e-05	1.85939e-05	0.0032711	0.0675271	0.541028	0.453347
21	44957	12	139684	6.70573e-05	1.4096e-05	0.00446185	0.0602846	0.0312058	0.0627749
21	44957	13	113388	7.15296e-05	1.61876e-05	0.00576091	0.0568667	0.0404759	0.116367
21	44957	14	97334	0.000118714	1.71245e-05	0.00113661	0.0897187	0.0627889	0.113119
21	44957	15	85307	6.67923e-05	1.66031e-05	0.0079133	0.0519705	0.0313899	0.0865681
21	44957	16	91982	7.19696e-05	1.52428e-05	0.00458061	0.0604846	0.0413366	0.10862
21	44957	17	79448	7.87169e-05	1.79739e-05	0.00593974	0.0569456	0.065839	0.217935
21	44957	18	87103	6.94571e-05	1.62473e-05	0.00644937	0.0551149	0.0360798	0.100666
21	44957	19	72794	6.23253e-05	1.82934e-05	0.0135512	0.0443871	0.0254048	0.0777627
21	44957	1	225949	9.64788e-05	1.11164e-05	0.000485025	0.105858	0.530255	0.425751
21	44957	20	68804	8.54698e-05	2.08264e-05	0.00740272	0.0538969	0.127696	0.347335
21	44957	21	44957	0.00172298	3.17803e-05	3.46455e-07	1	0	0
22	40361	10	152196	7.76294e-05	1.42124e-05	0.00273137	0.069486	0.0593606	0.153375
22	40361	11	151750	8.5228e-05	1.79011e-05	0.0044492	0.0618436	0.122568	0.320196
22	40361	12	139684	6.70774e-05	1.35709e-05	0.00390075	0.0625835	0.0312094	0.0577096
22	40361	13	113388	9.97988e-05	1.55814e-05	0.00152606	0.0823419	0.231615	0.370081
22	40361	14	97334	6.63741e-05	1.64874e-05	0.00789448	0.0520597	0.0307553	0.0828831
22	40361	15	85307	9.74155e-05	1.598e-05	0.00183132	0.0786651	0.398318	0.426536
22	40361	16	91982	8.92711e-05	1.46717e-05	0.00184409	0.0778629	0.228998	0.375475
22	40361	17	79448	8.59732e-05	1.7303e-05	0.0038293	0.0645474	0.134773	0.328496
22	40361	18	87103	9.06742e-05	1.56381e-05	0.00219972	0.0746724	0.325692	0.414951
22	40361	19	72794	0.000105104	1.76069e-05	0.0019779	0.0776844	0.126116	0.285618
22	40361	1	225949	0.000102775	1.07026e-05	0.000328677	0.117032	0.147066	0.235359
22	40361	20	68804	0.000117628	2.00522e-05	0.00210835	0.0769813	0.066031	0.154228
22	40361	21	44957	9.85186e-05	2.16344e-05	0.00519378	0.0601167	0.30537	0.426766
22	40361	22	40361	0.0016038	2.94548e-05	3.40541e-07	1	0	0
2	241231	10	152196	9.00086e-05	7.36799e-06	0.000128892	0.143767	0.249159	0.297426
2	241231	11	151750	7.78302e-05	9.28375e-06	0.000553744	0.100778	0.0568956	0.0756074
2	241231	12	139684	0.000112254	7.0378e-06	4.51617e-05	0.186891	0.0729598	0.0312674
2	241231	13	113388	9.80238e-05	8.07856e-06	0.000132348	0.144321	0.309718	0.332738
2	241231	14	97334	0.000101533	8.54648e-06	0.000143747	0.142107	0.166943	0.221301
2	241231	15	85307	0.000102664	8.28594e-06	0.000121953	0.147936	0.145814	0.183849
2	241231	16	91982	9.88675e-05	7.60705e-06	0.000101117	0.153878	0.254005	0.288669
2	241231	17	79448	9.6342e-05	8.97093e-06	0.000213065	0.129073	0.556041	0.413915
2	241231	18	87103	9.18271e-05	8.10794e-06	0.000173236	0.134943	0.449787	0.389555
2	241231	19	72794	9.76219e-05	9.12845e-06	0.00021658	0.128756	0.349545	0.365638
2	241231	1	225949	0.000100238	5.54927e-06	2.76123e-05	0.203683	0.188984	0.170896
2	241231	20	68804	0.000100156	1.03954e-05	0.000324503	0.116965	0.206191	0.300427
2	241231	21	44957	0.000107575	1.12182e-05	0.000330467	0.117136	0.0986485	0.15038
2	241231	22	40361	0.000105165	1.07996e-05	0.000311408	0.118844	0.117652	0.184788
2	241231	2	241231	0.000500042	7.9178e-06	1.88273e-07	1	0	0
3	212661	10	152196	0.000101777	8.08246e-06	0.000114458	0.150603	0.161873	0.202422
3	212661	11	151750	9.56806e-05	1.01804e-05	0.000357113	0.114775	0.822275	0.447868
3	212661	12	139684	9.00575e-05	7.71526e-06	0.000153988	0.138904	0.255015	0.307457
3	212661	13	113388	9.89167e-05	8.86153e-06	0.000183312	0.13492	0.256704	0.313483
3	212661	14	97334	0.000102943	9.37486e-06	0.000195416	0.133477	0.144076	0.203328
3	212661	15	85307	0.000100913	9.08853e-06	0.000187146	0.134713	0.183992	0.252327
3	212661	16	91982	9.12682e-05	8.34408e-06	0.000198397	0.131598	0.367063	0.369039
3	212661	17	79448	9.52972e-05	9.84028e-06	0.000318108	0.118278	1.12171	0.46055
3	212661	18	87103	9.43917e-05	8.89363e-06	0.000223063	0.128505	8.65349	0.494431
3	212661	19	72794	0.000103396	1.00138e-05	0.000248212	0.126336	0.13844	0.206547
3	212661	1	225949	9.52211e-05	6.0864e-06	4.87409e-05	0.17925	1.13461	0.441062
3	212661	20	68804	0.00011569	1.14064e-05	0.000266009	0.125164	0.0665519	0.066587
3	212661	21	44957	8.65466e-05	1.23042e-05	0.0010764	0.0873044	0.139258	0.282356
3	212661	22	40361	0.00010334	1.18457e-05	0.000475529	0.108188	0.14111	0.243006
3	212661	2	241231	9.43788e-05	6.14132e-06	5.23009e-05	0.176314	9.08212	0.492721
3	212661	3	212661	0.000582504	9.52684e-06	2.14262e-07	1	0	0
4	222222	10	152196	9.65589e-05	8.289e-06	0.00015521	0.139822	0.504044	0.397609
4	222222	11	151750	8.95119e-05	1.04416e-05	0.000508458	0.105077	0.231083	0.33645
4	222222	12	139684	8.60184e-05	7.91361e-06	0.0002033	0.129834	0.124634	0.17818
4	222222	13	113388	9.74442e-05	9.08853e-06	0.000214435	0.130066	0.371184	0.371853
4	222222	14	97334	7.99294e-05	9.61639e-06	0.00057221	0.10142	0.0680154	0.105096
4	222222	15	85307	7.99804e-05	9.32308e-06	0.000507076	0.104484	0.0681738	0.10007
4	222222	16	91982	0.000105718	8.5593e-06	0.000123463	0.14917	0.111373	0.125744
4	222222	17	79448	8.21848e-05	1.00939e-05	0.000619049	0.0998208	0.0834109	0.148744
4	222222	18	87103	8.82591e-05	9.12196e-06	0.000319245	0.117584	0.178729	0.273272
4	222222	19	72794	9.99539e-05	1.02699e-05	0.000312053	0.119517	0.215536	0.304386
4	222222	1	225949	9.34575e-05	6.2424e-06	5.79779e-05	0.172164	1.33988	0.451981
4	222222	20	68804	9.05903e-05	1.16949e-05	0.000748177	0.0959112	0.305687	0.384694
4	222222	21	44957	8.63915e-05	1.26196e-05	0.00119134	0.0852827	0.136769	0.283358
4	222222	22	40361	8.99605e-05	1.21488e-05	0.000887174	0.0921648	0.26044	0.370647
4	222222	2	241231	8.8401e-05	6.29925e-06	7.47974e-05	0.161612	0.173725	0.202443
4	222222	3	212661	8.57323e-05	6.91016e-06	0.000121315	0.1452	0.117614	0.142282
4	222222	4	222222	0.000607853	1.00215e-05	2.2124e-07	1	0	0
5	193613	10	152196	0.00010029	9.02656e-06	0.000186674	0.13501	0.202066	0.270309
5	193613	11	151750	5.4675e-05	1.13831e-05	0.00431415	0.0596675	0.017099	0.0125667
5	193613	12	139684	9.50144e-05	8.61658e-06	0.000192247	0.133324	1.52201	0.467203
5	193613	13	113388	7.96171e-05	9.89883e-06	0.000648561	0.0987957	0.0667475	0.106469
5	193613	14	97334	8.73008e-05	1.04699e-05	0.000565309	0.102981	0.154922	0.271294
5	193613	15	85307	9.31137e-05	1.015e-05	0.00039201	0.113085	1.00163	0.457774
5	193613	16	91982	9.99196e-05	9.31932e-06	0.000214428	0.131071	0.215789	0.288188
5	193613	17	79448	0.00011171	1.09928e-05	0.000264033	0.126137	0.0794037	0.0936792
5	193613	18	87103	7.54127e-05	9.93628e-06	0.000808306	0.0934022	0.049192	0.0652152
5	193613	19	72794	0.000103358	1.11837e-05	0.000381	0.114894	0.141193	0.23073
5	193613	1	225949	9.81424e-05	6.79781e-06	6.6897e-05	0.168077	0.294232	0.299201
5	193613	20	68804	9.67855e-05	1.2735e-05	0.000804157	0.0952623	0.480278	0.426223
5	193613	21	44957	9.85926e-05	1.37416e-05	0.000999186	0.090481	0.286941	0.384138
5	193613	22	40361	9.39949e-05	1.32292e-05	0.00103647	0.0895243	4.47468	0.492498
5	193613	2	241231	0.000100131	6.85943e-06	6.40514e-05	0.17018	0.198769	0.220081
5	193613	3	212661	0.000102083	7.52445e-06	8.54337e-05	0.160732	0.154532	0.178511
5	193613	4	222222	9.23659e-05	7.71655e-06	0.000139581	0.142319	0.57993	0.409109
5	193613	5	193613	0.000703277	1.18834e-05	2.44092e-07	1	0	0
6	206161	10	152196	0.000103718	1.03785e-05	0.000281704	0.123352	0.135317	0.20678
6	206161	11	151750	9.80186e-05	1.30726e-05	0.000846278	0.0945019	0.328638	0.393985
6	206161	12	139684	9.80599e-05	9.90688e-06	0.000292358	0.121561	0.31688	0.36039
6	206161	13	113388	7.67806e-05	1.13812e-05	0.0012583	0.0841717	0.05477	0.0995743
6	206161	14	97334	9.97211e-05	1.20373e-05	0.000579485	0.103922	0.229035	0.336772
6	206161	15	85307	0.000107772	1.16713e-05	0.00038226	0.115632	0.0998386	0.155613
6	206161	16	91982	9.46647e-05	1.07143e-05	0.000452921	0.109705	2.90138	0.485825
6	206161	17	79448	0.000105015	1.26366e-05	0.000572583	0.104757	0.123059	0.221288
6	206161	18	87103	9.44482e-05	1.14201e-05	0.000583236	0.103345	6.25622	0.493806
6	206161	19	72794	8.97237e-05	1.28576e-05	0.00110892	0.0881133	0.249761	0.371025
6	206161	1	225949	9.73894e-05	7.81553e-06	0.000119258	0.147349	0.367932	0.354636
6	206161	20	68804	0.000108097	1.4643e-05	0.000897531	0.0939952	0.0994446	0.199038
6	206161	21	44957	9.01798e-05	1.57991e-05	0.00232913	0.0731147	0.283134	0.404485
6	206161	22	40361	9.13395e-05	1.52101e-05	0.00193512	0.076856	0.400325	0.428554
6	206161	2	241231	9.28674e-05	7.88597e-06	0.000148763	0.139439	0.789822	0.434222
6	206161	3	212661	9.8909e-05	8.65044e-06	0.000166918	0.137583	0.25596	0.30971
6	206161	4	222222	0.00010106	8.87241e-06	0.000169422	0.137567	0.179441	0.243019
6	206161	5	193613	8.33871e-05	9.66217e-06	0.000495584	0.105525	0.0937442	0.161638
6	206161	6	206161	0.000899308	1.57085e-05	2.78701e-07	1	0	0
7	177384	10	152196	9.62684e-05	9.05492e-06	0.000221581	0.129281	0.582726	0.417646
7	177384	11	151750	0.000115205	1.14099e-05	0.000270696	0.125419	0.068256	0.0700038
7	177384	12	139684	0.00010729	8.64584e-06	0.00012121	0.150184	0.0995827	0.103006
7	177384	13	113388	9.54191e-05	9.92825e-06	0.000327612	0.118116	1.01139	0.456329
7	177384	14	97334	0.00011269	1.05059e-05	0.000214066	0.132608	0.0755226	0.0769791
7	177384	15	85307	9.27378e-05	1.01823e-05	0.000403052	0.112354	0.75176	0.444214
7	177384	16	91982	9.86722e-05	9.34883e-06	0.000227938	0.12912	0.273547	0.330755
7	177384	17	79448	0.000104846	1.10261e-05	0.00034137	0.1181	0.122966	0.195615
7	177384	18	87103	9.79887e-05	9.9646e-06	0.000299843	0.121069	0.323493	0.363605
7	177384	19	72794	9.09827e-05	1.12187e-05	0.000628443	0.100891	0.345403	0.392368
7	177384	1	225949	0.000106978	6.82147e-06	4.82817e-05	0.182763	0.0979306	0.0677089
7	177384	20	68804	9.73443e-05	1.27755e-05	0.000796345	0.0955793	0.395845	0.410537
7	177384	21	44957	8.09439e-05	1.37864e-05	0.00210157	0.0741037	0.0767031	0.194349
7	177384	22	40361	9.00815e-05	1.32714e-05	0.00122992	0.0855883	0.271855	0.384315
7	177384	2	241231	0.000103636	6.88198e-06	5.66603e-05	0.175708	0.128902	0.122266
7	177384	3	212661	8.95287e-05	7.54788e-06	0.000144633	0.140621	0.224329	0.282378
7	177384	4	222222	9.55364e-05	7.74107e-06	0.000123844	0.146846	0.890323	0.438497
7	177384	5	193613	9.99903e-05	8.42993e-06	0.000144637	0.142881	0.21015	0.266941
7	177384	6	206161	9.01063e-05	9.69189e-06	0.000372357	0.11375	0.265427	0.345158
7	177384	7	177384	0.000707156	1.19591e-05	2.44921e-07	1	0	0
8	163433	10	152196	7.66616e-05	8.94439e-06	0.000508855	0.104129	0.0528661	0.0601076
8	163433	11	151750	0.000129394	1.12733e-05	0.000164439	0.142478	0.0455889	0.0176729
8	163433	12	139684	8.54558e-05	8.53622e-06	0.000279812	0.120989	0.117277	0.180262
8	163433	13	113388	9.87984e-05	9.80369e-06	0.000272706	0.123699	0.267169	0.333717
8	163433	14	97334	9.96324e-05	1.03711e-05	0.000328152	0.118584	0.228884	0.315865
8	163433	15	85307	0.000103764	1.00552e-05	0.000248765	0.127152	0.134485	0.198976
8	163433	16	91982	9.48769e-05	9.23116e-06	0.000252687	0.125574	1.8779	0.474947
8	163433	17	79448	8.75848e-05	1.08869e-05	0.00064799	0.0997853	0.162738	0.286459
8	163433	18	87103	9.58725e-05	9.83928e-06	0.000310673	0.11981	0.730879	0.43887
8	163433	19	72794	9.12181e-05	1.10777e-05	0.000593004	0.10231	0.37263	0.398625
8	163433	1	225949	0.000101807	6.73434e-06	5.58e-05	0.175919	0.156921	0.162507
8	163433	20	68804	0.000113701	1.26178e-05	0.000419912	0.112917	0.073236	0.0989878
8	163433	21	44957	9.65968e-05	1.3612e-05	0.00104124	0.089446	0.520935	0.436004
8	163433	22	40361	9.35156e-05	1.31045e-05	0.00101965	0.0898681	1.58289	0.478724
8	163433	2	241231	0.000101253	6.79499e-06	5.90632e-05	0.173633	0.168657	0.180711
8	163433	3	212661	9.03358e-05	7.45295e-06	0.000132905	0.143513	0.272569	0.313186
8	163433	4	222222	8.76037e-05	7.64433e-06	0.000165447	0.136194	0.156385	0.216481
8	163433	5	193613	8.93559e-05	8.32391e-06	0.000213413	0.129146	0.219202	0.293708
8	163433	6	206161	0.000100877	9.57038e-06	0.000229109	0.128806	0.186246	0.263621
8	163433	7	177384	0.000105197	8.35147e-06	0.00011432	0.151672	0.115752	0.130132
8	163433	8	163433	0.00069185	1.16604e-05	2.41608e-07	1	0	0
9	129416	10	152196	9.00942e-05	9.27354e-06	0.000314229	0.118657	0.264158	0.338279
9	129416	11	151750	8.72941e-05	1.16818e-05	0.000857184	0.0932017	0.156292	0.291532
9	129416	12	139684	0.000100348	8.85294e-06	0.000172673	0.137759	0.200268	0.264672
9	129416	13	113388	9.32975e-05	1.01678e-05	0.000391671	0.113264	1.19705	0.464584
9	129416	14	97334	8.6522e-05	1.07567e-05	0.000648425	0.0998518	0.138793	0.255834
9	129416	15	85307	0.000100371	1.04283e-05	0.000325783	0.119258	0.203487	0.294651
9	129416	16	91982	0.000103523	9.57506e-06	0.000207568	0.132857	0.137283	0.193983
9	129416	17	79448	6.53572e-05	1.12982e-05	0.00221848	0.0721998	0.0281707	0.0312216
9	129416	18	87103	9.99793e-05	1.02052e-05	0.000304221	0.121147	0.216134	0.302518
9	129416	19	72794	9.21281e-05	1.14893e-05	0.000656133	0.100192	0.540055	0.430924
9	129416	1	225949	9.67223e-05	6.98384e-06	7.87854e-05	0.162057	0.459545	0.371075
9	129416	20	68804	9.52349e-05	1.30837e-05	0.000946456	0.0917057	1.23027	0.472079
9	129416	21	44957	9.34548e-05	1.41178e-05	0.00135034	0.0839082	1.47199	0.478638
9	129416	22	40361	9.79552e-05	1.35916e-05	0.00098245	0.0912754	0.335683	0.399575
9	129416	2	241231	0.000103295	7.04789e-06	6.30488e-05	0.171755	0.133907	0.13445
9	129416	3	212661	9.50867e-05	7.72972e-06	0.000125431	0.146472	1.36889	0.45997
9	129416	4	222222	9.35255e-05	7.92784e-06	0.00014774	0.140984	1.52247	0.465336
9	129416	5	193613	0.000102118	8.63364e-06	0.000146239	0.143109	0.157183	0.207041
9	129416	6	206161	0.000106515	9.92702e-06	0.000213804	0.131873	0.106773	0.142195
9	129416	7	177384	9.18878e-05	8.66047e-06	0.000223339	0.128459	0.469042	0.398871
9	129416	8	163433	8.96799e-05	8.55182e-06	0.00023372	0.126807	0.236772	0.310325
9	129416	9	129416	0.000737091	1.25432e-05	2.51092e-07	1	0	0

## Sheet: CHS
unscale:	chr1	chr2	chr3	chr4	chr5	chr6	chr7	chr8	chr9	chr10	chr11	chr12	chr13	chr14	chr15	chr16	chr17	chr18	chr19	chr20	chr21	chr22
chr1	0.000508886	9.42588e-05	0.000101664	0.000106985	0.000121799	0.000101496	9.59329e-05	0.000110209	0.000111191	0.000107802	0.000119084	9.09946e-05	0.000113615	0.000118132	8.61829e-05	0.000109873	0.000106072	0.000130709	9.41659e-05	0.000127208	0.000113873	9.37892e-05
chr2	9.42588e-05	0.000495219	9.41942e-05	0.000106026	9.93263e-05	8.50863e-05	8.73208e-05	0.000100051	9.64565e-05	9.009e-05	9.44717e-05	8.66411e-05	8.76931e-05	9.94764e-05	9.80366e-05	0.00011012	9.43168e-05	0.000107858	9.5759e-05	0.000107834	9.07956e-05	8.84746e-05
chr3	0.000101664	9.41942e-05	0.000600718	0.000103724	0.000113363	0.000105012	0.000111756	0.000105426	0.000100807	9.97684e-05	0.000115563	0.000110326	9.00672e-05	0.000114246	9.60244e-05	8.37765e-05	8.09703e-05	0.000101643	0.000114276	0.000114118	0.000113988	0.000102469
chr4	0.000106985	0.000106026	0.000103724	0.00061821	0.000101833	9.33616e-05	8.41225e-05	0.000100844	9.23438e-05	0.000103449	0.000112313	9.12745e-05	0.000100959	0.000113321	9.68768e-05	0.000102306	9.61439e-05	0.000105174	9.77877e-05	0.000135595	0.000124363	8.15055e-05
chr5	0.000121799	9.93263e-05	0.000113363	0.000101833	0.000744126	8.49539e-05	9.792e-05	0.000100585	0.000110079	9.60109e-05	9.24496e-05	0.000112622	0.00011129	0.000106169	8.27235e-05	0.000109752	0.000120317	0.000107889	0.000122118	0.000122447	9.48738e-05	0.000103926
chr6	0.000101496	8.50863e-05	0.000105012	9.33616e-05	8.49539e-05	0.000944633	8.25254e-05	0.00011129	0.000101945	0.00010393	9.06367e-05	9.05342e-05	0.00010607	0.000114278	9.06563e-05	0.000105588	0.000100602	9.3649e-05	9.37312e-05	8.91342e-05	0.0001044	0.000108714
chr7	9.59329e-05	8.73208e-05	0.000111756	8.41225e-05	9.792e-05	8.25254e-05	0.000703071	0.000106262	9.79061e-05	0.000111115	0.000107861	0.000114681	0.000124682	0.000132554	8.05288e-05	8.97613e-05	0.000101541	8.75385e-05	0.00010768	0.000117846	9.8123e-05	0.000107951
chr8	0.000110209	0.000100051	0.000105426	0.000100844	0.000100585	0.00011129	0.000106262	0.00071962	0.000108078	9.53779e-05	9.1467e-05	0.000105187	0.000103116	0.000126719	9.18634e-05	0.000110006	0.000115233	0.000108495	0.00011454	0.000129557	0.000101633	0.000117698
chr9	0.000111191	9.64565e-05	0.000100807	9.23438e-05	0.000110079	0.000101945	9.79061e-05	0.000108078	0.00075094	9.53689e-05	7.91268e-05	9.8754e-05	9.90905e-05	0.000114434	9.00897e-05	9.97868e-05	0.000120119	9.43066e-05	9.54727e-05	0.000122778	9.60012e-05	9.99319e-05
chr10	0.000107802	9.009e-05	9.97684e-05	0.000103449	9.60109e-05	0.00010393	0.000111115	9.53779e-05	9.53689e-05	0.000841594	0.000100368	0.000100524	0.000109949	0.000113114	8.863e-05	0.000107337	7.28126e-05	9.86332e-05	0.00011094	9.63262e-05	0.000110445	0.000125823
chr11	0.000119084	9.44717e-05	0.000115563	0.000112313	9.24496e-05	9.06367e-05	0.000107861	9.1467e-05	7.91268e-05	0.000100368	0.00130066	0.000112142	8.28169e-05	0.000114933	8.32264e-05	0.000101583	8.21318e-05	0.000113212	8.54851e-05	0.000117798	0.000117433	9.02269e-05
chr12	9.09946e-05	8.66411e-05	0.000110326	9.12745e-05	0.000112622	9.05342e-05	0.000114681	0.000105187	9.8754e-05	0.000100524	0.000112142	0.000741273	0.000109155	0.000112018	8.97056e-05	8.79858e-05	6.69324e-05	0.000100447	9.52837e-05	8.54626e-05	8.32351e-05	9.06649e-05
chr13	0.000113615	8.76931e-05	9.00672e-05	0.000100959	0.00011129	0.00010607	0.000124682	0.000103116	9.90905e-05	0.000109949	8.28169e-05	0.000109155	0.000958876	0.000113327	8.55595e-05	8.62981e-05	8.44575e-05	0.00010286	9.4346e-05	0.000134235	0.000108405	8.41802e-05
chr14	0.000118132	9.94764e-05	0.000114246	0.000113321	0.000106169	0.000114278	0.000132554	0.000126719	0.000114434	0.000113114	0.000114933	0.000112018	0.000113327	0.00111398	0.000110826	0.000112357	9.93556e-05	0.000114054	0.000106429	0.000115098	0.000112856	0.000126567
chr15	8.61829e-05	9.80366e-05	9.60244e-05	9.68768e-05	8.27235e-05	9.06563e-05	8.05288e-05	9.18634e-05	9.00897e-05	8.863e-05	8.32264e-05	8.97056e-05	8.55595e-05	0.000110826	0.000981589	0.000104991	9.69372e-05	8.86346e-05	8.61615e-05	9.80118e-05	0.000109368	5.96342e-05
chr16	0.000109873	0.00011012	8.37765e-05	0.000102306	0.000109752	0.000105588	8.97613e-05	0.000110006	9.97868e-05	0.000107337	0.000101583	8.79858e-05	8.62981e-05	0.000112357	0.000104991	0.000858015	0.000105575	9.8401e-05	0.000101248	0.00011835	8.84961e-05	9.20012e-05
chr17	0.000106072	9.43168e-05	8.09703e-05	9.61439e-05	0.000120317	0.000100602	0.000101541	0.000115233	0.000120119	7.28126e-05	8.21318e-05	6.69324e-05	8.44575e-05	9.93556e-05	9.69372e-05	0.000105575	0.00113871	0.000117854	0.000133411	0.000117125	0.000106033	8.487e-05
chr18	0.000130709	0.000107858	0.000101643	0.000105174	0.000107889	9.3649e-05	8.75385e-05	0.000108495	9.43066e-05	9.86332e-05	0.000113212	0.000100447	0.00010286	0.000114054	8.86346e-05	9.8401e-05	0.000117854	0.000970566	0.000105953	0.000108658	0.000158218	0.000102717
chr19	9.41659e-05	9.5759e-05	0.000114276	9.77877e-05	0.000122118	9.37312e-05	0.00010768	0.00011454	9.54727e-05	0.00011094	8.54851e-05	9.52837e-05	9.4346e-05	0.000106429	8.61615e-05	0.000101248	0.000133411	0.000105953	0.00117446	0.000133372	0.000105781	9.74558e-05
chr20	0.000127208	0.000107834	0.000114118	0.000135595	0.000122447	8.91342e-05	0.000117846	0.000129557	0.000122778	9.63262e-05	0.000117798	8.54626e-05	0.000134235	0.000115098	9.80118e-05	0.00011835	0.000117125	0.000108658	0.000133372	0.00151603	0.000127733	8.80449e-05
chr21	0.000113873	9.07956e-05	0.000113988	0.000124363	9.48738e-05	0.0001044	9.8123e-05	0.000101633	9.60012e-05	0.000110445	0.000117433	8.32351e-05	0.000108405	0.000112856	0.000109368	8.84961e-05	0.000106033	0.000158218	0.000105781	0.000127733	0.00169026	0.000100768
chr22	9.37892e-05	8.84746e-05	0.000102469	8.15055e-05	0.000103926	0.000108714	0.000107951	0.000117698	9.99319e-05	0.000125823	9.02269e-05	9.06649e-05	8.41802e-05	0.000126567	5.96342e-05	9.20012e-05	8.487e-05	0.000102717	9.74558e-05	8.80449e-05	0.000100768	0.00157566
scale:	chr1	chr2	chr3	chr4	chr5	chr6	chr7	chr8	chr9	chr10	chr11	chr12	chr13	chr14	chr15	chr16	chr17	chr18	chr19	chr20	chr21	chr22
chr1	1	0.18938	0.185405	0.192275	0.199487	0.147407	0.161733	0.183697	0.181592	0.166096	0.147387	0.149526	0.164113	0.158316	0.12321	0.168072	0.140731	0.187914	0.123059	0.146161	0.124135	0.106033
chr2	0.18938	1	0.174109	0.193133	0.164884	0.125248	0.149208	0.169025	0.159661	0.140686	0.118508	0.1443	0.128385	0.135119	0.142055	0.170731	0.126829	0.157161	0.126835	0.125578	0.100318	0.101379
chr3	0.185405	0.174109	1	0.1715	0.170816	0.140312	0.173336	0.161667	0.151461	0.14142	0.131586	0.166788	0.119691	0.140859	0.126297	0.117899	0.0988326	0.134436	0.137392	0.120631	0.114319	0.106578
chr4	0.192275	0.193133	0.1715	1	0.151215	0.122934	0.128581	0.152394	0.136731	0.144509	0.126028	0.135983	0.132217	0.137689	0.125568	0.141886	0.115649	0.137086	0.11586	0.141252	0.122913	0.0835428
chr5	0.199487	0.164884	0.170816	0.151215	1	0.101943	0.136398	0.138524	0.148537	0.122224	0.0945394	0.152907	0.132821	0.11756	0.0977144	0.138714	0.131892	0.128155	0.131856	0.116244	0.0854522	0.0970772
chr6	0.147407	0.125248	0.140312	0.122934	0.101943	1	0.101934	0.135908	0.121981	0.117321	0.0821881	0.108997	0.112254	0.112206	0.0949565	0.118336	0.0977906	0.098641	0.0897435	0.0750349	0.0833823	0.0900481
chr7	0.161733	0.149208	0.173336	0.128581	0.136398	0.101934	1	0.150635	0.135987	0.145602	0.113535	0.160272	0.15317	0.151082	0.0979129	0.116776	0.114576	0.107032	0.119678	0.115158	0.0909718	0.103796
chr8	0.183697	0.169025	0.161667	0.152394	0.138524	0.135908	0.150635	1	0.148416	0.123566	0.0951886	0.145338	0.125242	0.142796	0.110429	0.141494	0.128553	0.131154	0.125862	0.125169	0.0931589	0.111885
chr9	0.181592	0.159661	0.151461	0.136731	0.148537	0.121981	0.135987	0.148416	1	0.121059	0.0806835	0.133694	0.117923	0.126348	0.10611	0.125757	0.131298	0.1117	0.102791	0.116224	0.0862198	0.0930786
chr10	0.166096	0.140686	0.14142	0.144509	0.122224	0.117321	0.145602	0.123566	0.121059	1	0.0965521	0.128391	0.123442	0.117825	0.0984852	0.12762	0.075086	0.110215	0.112686	0.0860254	0.09358	0.110564
chr11	0.147387	0.118508	0.131586	0.126028	0.0945394	0.0821881	0.113535	0.0951886	0.0806835	0.0965521	1	0.115054	0.0746899	0.096169	0.0742886	0.0970193	0.0680354	0.101621	0.0697499	0.084507	0.0799281	0.0636883
chr12	0.149526	0.1443	0.166788	0.135983	0.152907	0.108997	0.160272	0.145338	0.133694	0.128391	0.115054	1	0.130702	0.124444	0.106311	0.11157	0.0736135	0.119707	0.103221	0.0814004	0.0752164	0.084969
chr13	0.164113	0.128385	0.119691	0.132217	0.132821	0.112254	0.15317	0.125242	0.117923	0.123442	0.0746899	0.130702	1	0.11067	0.0891318	0.096193	0.0816518	0.107756	0.0898422	0.112389	0.0861117	0.0693486
chr14	0.158316	0.135119	0.140859	0.137689	0.11756	0.112206	0.151082	0.142796	0.126348	0.117825	0.096169	0.124444	0.11067	1	0.107116	0.116196	0.0891185	0.110854	0.0940299	0.0894071	0.0831733	0.0967376
chr15	0.12321	0.142055	0.126297	0.125568	0.0977144	0.0949565	0.0979129	0.110429	0.10611	0.0984852	0.0742886	0.106311	0.0891318	0.107116	1	0.115827	0.0927548	0.0918996	0.081206	0.0812182	0.0859845	0.048623
chr16	0.168072	0.170731	0.117899	0.141886	0.138714	0.118336	0.116776	0.141494	0.125757	0.12762	0.0970193	0.11157	0.096193	0.116196	0.115827	1	0.10809	0.109166	0.102103	0.104935	0.0744444	0.0802633
chr17	0.140731	0.126829	0.0988326	0.115649	0.131892	0.0977906	0.114576	0.128553	0.131298	0.075086	0.0680354	0.0736135	0.0816518	0.0891185	0.0927548	0.10809	1	0.113401	0.116689	0.0900716	0.077363	0.0642189
chr18	0.187914	0.157161	0.134436	0.137086	0.128155	0.098641	0.107032	0.131154	0.1117	0.110215	0.101621	0.119707	0.107756	0.110854	0.0918996	0.109166	0.113401	1	0.100419	0.0905447	0.125087	0.0842201
chr19	0.123059	0.126835	0.137392	0.11586	0.131856	0.0897435	0.119678	0.125862	0.102791	0.112686	0.0697499	0.103221	0.0898422	0.0940299	0.081206	0.102103	0.116689	0.100419	1	0.101026	0.0760205	0.072635
chr20	0.146161	0.125578	0.120631	0.141252	0.116244	0.0750349	0.115158	0.125169	0.116224	0.0860254	0.084507	0.0814004	0.112389	0.0894071	0.0812182	0.104935	0.0900716	0.0905447	0.101026	1	0.0807095	0.0576955
chr21	0.124135	0.100318	0.114319	0.122913	0.0854522	0.0833823	0.0909718	0.0931589	0.0862198	0.09358	0.0799281	0.0752164	0.0861117	0.0831733	0.0859845	0.0744444	0.077363	0.125087	0.0760205	0.0807095	1	0.062649
chr22	0.106033	0.101379	0.106578	0.0835428	0.0970772	0.0900481	0.103796	0.111885	0.0930786	0.110564	0.0636883	0.084969	0.0693486	0.0967376	0.048623	0.0802633	0.0642189	0.0842201	0.072635	0.0576955	0.062649	1
raw result:
Tagi	SNPi	Tagj	SNPj	rsq	sd	pval	rsq_s	sd_s	pval_s
10	152231	10	152231	0.000841594	1.43713e-05	2.54595e-07	1	0	0
11	151749	10	152231	0.000100368	1.29003e-05	0.000735812	0.0965521	0.128857	0.247669
11	151749	11	151749	0.00130066	2.31574e-05	3.00818e-07	1	0	0
12	139683	10	152231	0.000100524	9.4598e-06	0.000222005	0.128391	0.123636	0.178853
12	139683	11	151749	0.000112142	1.20105e-05	0.000366269	0.115054	0.0643999	0.0742721
12	139683	12	139683	0.000741273	1.24512e-05	2.38365e-07	1	0	0
13	113388	10	152231	0.000109949	1.093e-05	0.000274627	0.123442	0.070043	0.0763959
13	113388	11	151749	8.28169e-05	1.38709e-05	0.00197659	0.0746899	0.131362	0.300021
13	113388	12	139683	0.000109155	1.01738e-05	0.00021387	0.130702	0.0720012	0.0718318
13	113388	13	113388	0.000958876	1.66159e-05	2.69962e-07	1	0	0
14	97335	10	152231	0.000113114	1.18667e-05	0.000338187	0.117825	0.0623263	0.0658403
14	97335	11	151749	0.000114933	1.50622e-05	0.000792024	0.096169	0.0597398	0.0913642
14	97335	12	139683	0.000112018	1.10457e-05	0.000266143	0.124444	0.064424	0.062789
14	97335	13	113388	0.000113327	1.27593e-05	0.00044387	0.11067	0.0623598	0.0753059
14	97335	14	97335	0.00111398	1.95844e-05	2.85999e-07	1	0	0
15	85307	10	152231	8.863e-05	1.10689e-05	0.000659715	0.0984852	0.525872	0.430279
15	85307	11	151749	8.32264e-05	1.40511e-05	0.00203514	0.0742886	0.139604	0.311408
15	85307	12	139683	8.97056e-05	1.0303e-05	0.000479107	0.106311	1.09823	0.46377
15	85307	13	113388	8.55595e-05	1.19022e-05	0.000991976	0.0891318	0.206242	0.343948
15	85307	14	97335	0.000110826	1.29243e-05	0.00050793	0.107116	0.0687518	0.0971154
15	85307	15	85307	0.000981589	1.70506e-05	2.72579e-07	1	0	0
16	91985	10	152231	0.000107337	1.0275e-05	0.000237235	0.12762	0.0787751	0.0902683
16	91985	11	151749	0.000101583	1.30408e-05	0.000732459	0.0970193	0.116268	0.225483
16	91985	12	139683	8.79858e-05	9.56181e-06	0.000387424	0.11157	0.392621	0.395192
16	91985	13	113388	8.62981e-05	1.10459e-05	0.000724284	0.096193	0.241206	0.355207
16	91985	14	97335	0.000112357	1.19954e-05	0.000361808	0.116196	0.0643094	0.0725405
16	91985	15	85307	0.000104991	1.11909e-05	0.000359569	0.115827	0.0906815	0.135299
16	91985	16	91985	0.000858015	1.46856e-05	2.56955e-07	1	0	0
17	79449	10	152231	7.28126e-05	1.20078e-05	0.00186741	0.075086	0.050366	0.105136
17	79449	11	151749	8.21318e-05	1.524e-05	0.00286659	0.0680354	0.12096	0.301914
17	79449	12	139683	6.69324e-05	1.11793e-05	0.00195652	0.0736135	0.0345773	0.050163
17	79449	13	113388	8.44575e-05	1.29092e-05	0.00141051	0.0816518	0.168761	0.3269
17	79449	14	97335	9.93556e-05	1.40151e-05	0.00104525	0.0891185	0.144335	0.285179
17	79449	15	85307	9.69372e-05	1.30769e-05	0.000883585	0.0927548	0.194549	0.329202
17	79449	16	91985	0.000105575	1.21376e-05	0.000480919	0.10809	0.0881787	0.143753
17	79449	17	79449	0.00113871	2.00578e-05	2.88206e-07	1	0	0
18	87103	10	152231	9.86332e-05	1.10007e-05	0.000428083	0.110215	0.152867	0.255403
18	87103	11	151749	0.000113212	1.39669e-05	0.000629674	0.101621	0.0630097	0.0910443
18	87103	12	139683	0.000100447	1.02399e-05	0.000302728	0.119707	0.125773	0.197553
18	87103	13	113388	0.00010286	1.18292e-05	0.000481505	0.107756	0.104816	0.181015
18	87103	14	97335	0.000114054	1.28451e-05	0.000444399	0.110854	0.0609238	0.0714759
18	87103	15	85307	8.86346e-05	1.19818e-05	0.000890558	0.0918996	0.532367	0.435665
18	87103	16	91985	9.8401e-05	1.11203e-05	0.000450286	0.109166	0.157676	0.263407
18	87103	17	79449	0.000117854	1.30007e-05	0.000410377	0.113401	0.0542353	0.0523619
18	87103	18	87103	0.000970566	1.68397e-05	2.71322e-07	1	0	0
19	72789	10	152231	0.00011094	1.22114e-05	0.000406951	0.112686	0.0679448	0.086278
19	72789	11	151749	8.54851e-05	1.54974e-05	0.00263612	0.0697499	0.207155	0.376632
19	72789	12	139683	9.52837e-05	1.13638e-05	0.000553399	0.103221	0.256057	0.35374
19	72789	13	113388	9.4346e-05	1.31273e-05	0.000992788	0.0898422	0.323729	0.397566
19	72789	14	97335	0.000106429	1.42532e-05	0.000859625	0.0940299	0.0851938	0.165823
19	72789	15	85307	8.61615e-05	1.3298e-05	0.0014622	0.081206	0.237775	0.374948
19	72789	16	91985	0.000101248	1.2342e-05	0.000601544	0.102103	0.119476	0.22047
19	72789	17	79449	0.000133411	1.44344e-05	0.000380892	0.116689	0.0393436	0.0206562
19	72789	18	87103	0.000105953	1.32169e-05	0.000656793	0.100419	0.0870003	0.156335
19	72789	19	72789	0.00117446	2.07419e-05	2.91251e-07	1	0	0
1	225957	10	152231	0.000107802	7.58713e-06	7.12402e-05	0.166096	0.0735987	0.0434949
1	225957	11	151749	0.000119084	9.63425e-06	0.0001231	0.147387	0.0499121	0.0209236
1	225957	12	139683	9.09946e-05	7.05885e-06	0.000104416	0.149526	3.61868	0.48451
1	225957	13	113388	0.000113615	8.16026e-06	7.71623e-05	0.164113	0.0583234	0.024064
1	225957	14	97335	0.000118132	8.86063e-06	9.14939e-05	0.158316	0.0510072	0.018044
1	225957	15	85307	8.61829e-05	8.26057e-06	0.000238416	0.12321	0.225152	0.306659
1	225957	16	91985	0.000109873	7.67047e-06	6.9002e-05	0.168072	0.0671345	0.0332581
1	225957	17	79449	0.000106072	8.96162e-06	0.000145839	0.140731	0.0819934	0.0806167
1	225957	18	87103	0.000130709	8.22692e-06	4.58637e-05	0.187914	0.0383918	0.00403753
1	225957	19	72789	9.41659e-05	9.11083e-06	0.000247259	0.123059	0.323752	0.361596
1	225957	1	225957	0.000508886	8.0036e-06	1.83258e-07	1	0	0
20	68836	10	152231	9.63262e-05	1.40009e-05	0.00116936	0.0860254	0.21418	0.354238
20	68836	11	151749	0.000117798	1.77762e-05	0.00134494	0.084507	0.055406	0.100946
20	68836	12	139683	8.54626e-05	1.30321e-05	0.00139824	0.0814004	0.202423	0.354075
20	68836	13	113388	0.000134235	1.5066e-05	0.000438551	0.112389	0.0388069	0.0221453
20	68836	14	97335	0.000115098	1.63473e-05	0.00107245	0.0894071	0.0598764	0.10484
20	68836	15	85307	9.80118e-05	1.52504e-05	0.00150694	0.0812182	0.169456	0.32838
20	68836	16	91985	0.00011835	1.41579e-05	0.000559897	0.104935	0.0536806	0.0611408
20	68836	17	79449	0.000117125	1.65442e-05	0.00105059	0.0900716	0.0563585	0.0926218
20	68836	18	87103	0.000108658	1.51574e-05	0.00100239	0.0905447	0.0764082	0.150803
20	68836	19	72789	0.000133372	1.68299e-05	0.000686187	0.101026	0.0397772	0.0319978
20	68836	1	225957	0.000127208	1.04599e-05	0.000131178	0.146161	0.0417404	0.0124292
20	68836	20	68836	0.00151603	2.72793e-05	3.13824e-07	1	0	0
21	45046	10	152231	0.000110445	1.48342e-05	0.000869131	0.09358	0.0702823	0.12692
21	45046	11	151749	0.000117433	1.88308e-05	0.00168433	0.0799281	0.0562761	0.114277
21	45046	12	139683	8.32351e-05	1.38058e-05	0.00190727	0.0752164	0.139042	0.308626
21	45046	13	113388	0.000108405	1.59498e-05	0.00122386	0.0861117	0.077561	0.164568
21	45046	14	97335	0.000112856	1.73167e-05	0.00143093	0.0831733	0.064987	0.134894
21	45046	15	85307	0.000109368	1.61573e-05	0.00124264	0.0859845	0.074405	0.15608
21	45046	16	91985	8.84961e-05	1.49931e-05	0.00206129	0.0744444	0.505767	0.445051
21	45046	17	79449	0.000106033	1.75233e-05	0.00188198	0.077363	0.0884138	0.215482
21	45046	18	87103	0.000158218	1.6081e-05	0.000299243	0.125087	0.0296495	0.00674493
21	45046	19	72789	0.000105781	1.78196e-05	0.00201873	0.0760205	0.0898241	0.222516
21	45046	1	225957	0.000113873	1.10729e-05	0.000252113	0.124135	0.0592529	0.0521198
21	45046	20	68836	0.000127733	2.04405e-05	0.00167166	0.0807095	0.0445116	0.0720033
21	45046	21	45046	0.00169026	3.06139e-05	3.2213e-07	1	0	0
22	40368	10	152231	0.000125823	1.42985e-05	0.00045999	0.110564	0.0449396	0.0348356
22	40368	11	151749	9.02269e-05	1.81404e-05	0.00381538	0.0636883	2.42688	0.49016
22	40368	12	139683	9.06649e-05	1.33017e-05	0.0012109	0.084969	29.7259	0.498928
22	40368	13	113388	8.41802e-05	1.53664e-05	0.00270248	0.0693486	0.163365	0.346519
22	40368	14	97335	0.000126567	1.66894e-05	0.000810714	0.0967376	0.0449603	0.0489015
22	40368	15	85307	5.96342e-05	1.55715e-05	0.0093114	0.048623	0.0243429	0.0582298
22	40368	16	91985	9.20012e-05	1.4446e-05	0.00155855	0.0802633	0.893076	0.466354
22	40368	17	79449	8.487e-05	1.68829e-05	0.00367457	0.0642189	0.18587	0.37356
22	40368	18	87103	0.000102717	1.54701e-05	0.00133519	0.0842201	0.108429	0.240345
22	40368	19	72789	9.74558e-05	1.71685e-05	0.00237636	0.072635	0.184659	0.357064
22	40368	1	225957	9.37892e-05	1.06647e-05	0.000461064	0.106033	0.366394	0.393329
22	40368	20	68836	8.80449e-05	1.96888e-05	0.00552955	0.0576955	0.427361	0.449565
22	40368	21	45046	0.000100768	2.08579e-05	0.0042271	0.062649	0.129825	0.327312
22	40368	22	40368	0.00157566	2.84206e-05	3.16855e-07	1	0	0
2	241232	10	152231	9.009e-05	7.45865e-06	0.000134731	0.140686	1.71187	0.469225
2	241232	11	151749	9.44717e-05	9.4681e-06	0.00028342	0.118508	0.297707	0.355456
2	241232	12	139683	8.66411e-05	6.94276e-06	0.000118573	0.1443	0.246624	0.294947
2	241232	13	113388	8.76931e-05	8.02011e-06	0.000198675	0.128385	0.342084	0.363244
2	241232	14	97335	9.94764e-05	8.70779e-06	0.000167496	0.135119	0.13407	0.185277
2	241232	15	85307	9.80366e-05	8.12484e-06	0.000135269	0.142055	0.157345	0.208836
2	241232	16	91985	0.00011012	7.54434e-06	6.40721e-05	0.170731	0.0662145	0.0307139
2	241232	17	79449	9.43168e-05	8.81172e-06	0.000215849	0.126829	0.309238	0.351362
2	241232	18	87103	0.000107858	8.07716e-06	9.09256e-05	0.157161	0.0739063	0.050302
2	241232	19	72789	9.5759e-05	8.96086e-06	0.000217202	0.126835	0.224769	0.301348
2	241232	1	225957	9.42588e-05	5.56636e-06	3.56523e-05	0.18938	0.29642	0.278822
2	241232	20	68836	0.000107834	1.02787e-05	0.000233347	0.125578	0.0752915	0.0853314
2	241232	21	45046	9.07956e-05	1.08861e-05	0.000564722	0.100318	11.7918	0.49681
2	241232	22	40368	8.84746e-05	1.04889e-05	0.00054092	0.101379	0.477183	0.42107
2	241232	2	241232	0.000495219	7.74202e-06	1.78913e-07	1	0	0
3	212659	10	152231	9.97684e-05	8.37588e-06	0.000142277	0.14142	0.130622	0.169929
3	212659	11	151749	0.000115563	1.06365e-05	0.000203655	0.131586	0.0562144	0.0396551
3	212659	12	139683	0.000110326	7.79999e-06	7.25194e-05	0.166788	0.0661821	0.0326738
3	212659	13	113388	9.00672e-05	9.00531e-06	0.000280832	0.119691	1.69531	0.473552
3	212659	14	97335	0.000114246	9.78186e-06	0.000153641	0.140859	0.0584312	0.0367505
3	212659	15	85307	9.60244e-05	9.12263e-06	0.000230348	0.126297	0.216492	0.295473
3	212659	16	91985	8.37765e-05	8.46658e-06	0.000292724	0.117899	0.144088	0.229579
3	212659	17	79449	8.09703e-05	9.895e-06	0.000607343	0.0988326	0.100455	0.190445
3	212659	18	87103	0.000101643	9.06694e-06	0.000180287	0.134436	0.111377	0.146957
3	212659	19	72789	0.000114276	1.00665e-05	0.000171661	0.137392	0.0585815	0.0394595
3	212659	1	225957	0.000101664	6.25174e-06	4.18397e-05	0.185405	0.10566	0.0770808
3	212659	20	68836	0.000114118	1.15429e-05	0.000293704	0.120631	0.0593998	0.0560533
3	212659	21	45046	0.000113988	1.22276e-05	0.000368502	0.114319	0.0599719	0.0646547
3	212659	22	40368	0.000102469	1.17786e-05	0.000480623	0.106578	0.106664	0.187124
3	212659	2	241232	9.41942e-05	6.14718e-06	5.29049e-05	0.174109	0.306529	0.3002
3	212659	3	212659	0.000600718	9.76117e-06	2.08776e-07	1	0	0
4	222221	10	152231	0.000103449	8.51913e-06	0.000131949	0.144509	0.0965233	0.104352
4	222221	11	151749	0.000112313	1.08159e-05	0.00024281	0.126028	0.0630084	0.0580468
4	222221	12	139683	9.12745e-05	7.92803e-06	0.000162499	0.135983	1.88634	0.472996
4	222221	13	113388	0.000100959	9.15948e-06	0.000192557	0.132217	0.118038	0.162687
4	222221	14	97335	0.000113321	9.94763e-06	0.000169343	0.137689	0.0604706	0.0425356
4	222221	15	85307	9.68768e-05	9.27783e-06	0.000237645	0.125568	0.188675	0.271065
4	222221	16	91985	0.000102306	8.61145e-06	0.000143739	0.141886	0.105247	0.124452
4	222221	17	79449	9.61439e-05	1.00626e-05	0.00033513	0.115649	0.213868	0.308693
4	222221	18	87103	0.000105174	9.22197e-06	0.000168597	0.137086	0.0873037	0.0957264
4	222221	19	72789	9.77877e-05	1.0233e-05	0.000334915	0.11586	0.167322	0.26338
4	222221	1	225957	0.000106985	6.36007e-06	3.66034e-05	0.192275	0.0749732	0.0311672
4	222221	20	68836	0.000135595	1.17505e-05	0.000161041	0.141252	0.0368243	0.00926266
4	222221	21	45046	0.000124363	1.24397e-05	0.000281302	0.122913	0.0453337	0.0267332
4	222221	22	40368	8.15055e-05	1.19784e-05	0.00121866	0.0835428	0.108785	0.242669
4	222221	2	241232	0.000106026	6.25496e-06	3.55106e-05	0.193133	0.0787074	0.0350786
4	222221	3	212659	0.000103724	7.02176e-06	6.11281e-05	0.1715	0.0923988	0.0685097
4	222221	4	222221	0.00061821	1.00959e-05	2.13007e-07	1	0	0
5	193619	10	152231	9.60109e-05	9.47986e-06	0.000267507	0.122224	0.218271	0.302689
5	193619	11	151749	9.24496e-05	1.20334e-05	0.000771831	0.0945394	0.651313	0.445806
5	193619	12	139683	0.000112622	8.82862e-06	0.000108797	0.152907	0.0614847	0.0338539
5	193619	13	113388	0.00011129	1.01969e-05	0.000200096	0.132821	0.0657134	0.0566701
5	193619	14	97335	0.000106169	1.10681e-05	0.000330061	0.11756	0.0840838	0.11731
5	193619	15	85307	8.27235e-05	1.03261e-05	0.000658458	0.0977144	0.126431	0.241366
5	193619	16	91985	0.000109752	9.58614e-06	0.000166065	0.138714	0.06973	0.0587726
5	193619	17	79449	0.000120317	1.12063e-05	0.00021328	0.131892	0.0498138	0.0285593
5	193619	18	87103	0.000107889	1.02641e-05	0.000231593	0.128155	0.0764779	0.0845517
5	193619	19	72789	0.000122118	1.13964e-05	0.000214918	0.131856	0.0477337	0.025364
5	193619	1	225957	0.000121799	7.08682e-06	3.36216e-05	0.199487	0.0452232	0.00579501
5	193619	20	68836	0.000122447	1.30675e-05	0.00036126	0.116244	0.047774	0.035866
5	193619	21	45046	9.48738e-05	1.38358e-05	0.00118402	0.0854522	0.283461	0.389043
5	193619	22	40368	0.000103926	1.3332e-05	0.000730473	0.0970772	0.0978501	0.188653
5	193619	2	241232	9.93263e-05	6.95872e-06	6.99688e-05	0.164884	0.133	0.141418
5	193619	3	212659	0.000113363	7.81856e-06	6.57803e-05	0.170816	0.0588022	0.0219502
5	193619	4	222221	0.000101833	7.94681e-06	0.000106882	0.151215	0.107906	0.116863
5	193619	5	193619	0.000744126	1.25058e-05	2.38875e-07	1	0	0
6	206161	10	152231	0.00010393	1.08383e-05	0.000330489	0.117321	0.096093	0.144582
6	206161	11	151749	9.06367e-05	1.37563e-05	0.00137401	0.0821881	17.0683	0.498194
6	206161	12	139683	9.05342e-05	1.0087e-05	0.000426389	0.108997	6.51431	0.493726
6	206161	13	113388	0.00010607	1.16543e-05	0.000404139	0.112254	0.085092	0.128774
6	206161	14	97335	0.000114278	1.26546e-05	0.000416464	0.112206	0.0601738	0.0678297
6	206161	15	85307	9.06563e-05	1.18039e-05	0.000772816	0.0949565	24.0306	0.498518
6	206161	16	91985	0.000105588	1.09566e-05	0.000324199	0.118336	0.087061	0.122828
6	206161	17	79449	0.000100602	1.28033e-05	0.000708723	0.0977906	0.126457	0.241248
6	206161	18	87103	9.3649e-05	1.17307e-05	0.000667255	0.098641	0.392761	0.407037
6	206161	19	72789	9.37312e-05	1.30191e-05	0.00098633	0.0897435	0.385818	0.413742
6	206161	1	225957	0.000101496	8.08852e-06	0.000116048	0.147407	0.110418	0.126396
6	206161	20	68836	8.91342e-05	1.49304e-05	0.0019773	0.0750349	0.714118	0.460688
6	206161	21	45046	0.0001044	1.58178e-05	0.00136521	0.0833823	0.0962739	0.217649
6	206161	22	40368	0.000108714	1.52415e-05	0.00102146	0.0900481	0.0761729	0.151309
6	206161	2	241232	8.50863e-05	7.95431e-06	0.000216374	0.125248	0.177351	0.259509
6	206161	3	212659	0.000105012	8.93323e-06	0.000149808	0.140312	0.0875362	0.0921095
6	206161	4	222221	9.33616e-05	9.08307e-06	0.000252614	0.122934	0.419976	0.392148
6	206161	5	193619	8.49539e-05	1.01094e-05	0.000548733	0.101943	0.179245	0.299974
6	206161	6	206161	0.000944633	1.63434e-05	2.68267e-07	1	0	0
7	177390	10	152231	0.000111115	9.18111e-06	0.000133691	0.145602	0.0654017	0.0449912
7	177390	11	151749	0.000107861	1.16515e-05	0.000378563	0.113535	0.0770523	0.10731
7	177390	12	139683	0.000114681	8.54811e-06	8.92717e-05	0.160272	0.057012	0.0241293
7	177390	13	113388	0.000124682	9.87835e-06	0.000113419	0.15317	0.0443847	0.0130157
7	177390	14	97335	0.000132554	1.07278e-05	0.000123272	0.151082	0.0385651	0.00864144
7	177390	15	85307	8.05288e-05	9.99683e-06	0.000644785	0.0979129	0.0961789	0.183115
7	177390	16	91985	8.97613e-05	9.27677e-06	0.000319185	0.116776	1.15044	0.462017
7	177390	17	79449	0.000101541	1.08426e-05	0.00036205	0.114576	0.114589	0.186976
7	177390	18	87103	8.75385e-05	9.93395e-06	0.000457527	0.107032	0.335992	0.383001
7	177390	19	72789	0.00010768	1.10273e-05	0.000308102	0.119678	0.0776866	0.0991398
7	177390	1	225957	9.59329e-05	6.84883e-06	7.53536e-05	0.161733	0.211764	0.243792
7	177390	20	68836	0.000117846	1.26488e-05	0.000369341	0.115158	0.0535969	0.049068
7	177390	21	45046	9.8123e-05	1.33944e-05	0.00092388	0.0909718	0.164205	0.304541
7	177390	22	40368	0.000107951	1.29074e-05	0.00055881	0.103796	0.0776349	0.126101
7	177390	2	241232	8.73208e-05	6.73578e-06	0.000102133	0.149208	0.297141	0.320974
7	177390	3	212659	0.000111756	7.5685e-06	6.12222e-05	0.173336	0.0621806	0.0247159
7	177390	4	222221	8.41225e-05	7.69225e-06	0.000198544	0.128581	0.150275	0.220213
7	177390	5	193619	9.792e-05	8.56122e-06	0.000166711	0.136398	0.16177	0.223304
7	177390	6	206161	8.25254e-05	9.78699e-06	0.000541633	0.101934	0.121973	0.225165
7	177390	7	177390	0.000703071	1.17201e-05	2.31231e-07	1	0	0
8	163434	10	152231	9.53779e-05	9.30034e-06	0.000254851	0.123566	0.245803	0.320795
8	163434	11	151749	9.1467e-05	1.18055e-05	0.000747568	0.0951886	1.47081	0.475752
8	163434	12	139683	0.000105187	8.65882e-06	0.000131747	0.145338	0.0868198	0.0847199
8	163434	13	113388	0.000103116	1.00015e-05	0.000249643	0.125242	0.100868	0.141101
8	163434	14	97335	0.000126719	1.08676e-05	0.000154627	0.142796	0.0429572	0.0146326
8	163434	15	85307	9.18634e-05	1.01301e-05	0.000409815	0.110429	0.964009	0.45716
8	163434	16	91985	0.000110006	9.4049e-06	0.000152755	0.141494	0.0688581	0.0545432
8	163434	17	79449	0.000115233	1.09921e-05	0.000234014	0.128553	0.057527	0.0445746
8	163434	18	87103	0.000108495	1.00701e-05	0.000210412	0.131154	0.074167	0.0758652
8	163434	19	72789	0.00011454	1.11776e-05	0.000255619	0.125862	0.0589439	0.0498075
8	163434	1	225957	0.000110209	6.94541e-06	4.6093e-05	0.183697	0.065267	0.0240469
8	163434	20	68836	0.000129557	1.2824e-05	0.000270099	0.125169	0.0412084	0.019249
8	163434	21	45046	0.000101633	1.35746e-05	0.000850996	0.0931589	0.11568	0.232891
8	163434	22	40368	0.000117698	1.30836e-05	0.000422669	0.111885	0.0541643	0.0538788
8	163434	2	241232	0.000100051	6.8272e-06	6.30724e-05	0.169025	0.123377	0.121278
8	163434	3	212659	0.000105426	7.66723e-06	8.10437e-05	0.161667	0.084103	0.0634714
8	163434	4	222221	0.000100844	7.79618e-06	0.000103024	0.152394	0.117101	0.13151
8	163434	5	193619	0.000100585	8.67659e-06	0.000158175	0.138524	0.121579	0.159073
8	163434	6	206161	0.00011129	9.92163e-06	0.000179869	0.135908	0.0654203	0.0531645
8	163434	7	177390	0.000106262	8.40124e-06	0.000112487	0.150635	0.0812609	0.0686981
8	163434	8	163434	0.00071962	1.20368e-05	2.34394e-07	1	0	0
9	129420	10	152231	9.53689e-05	9.5291e-06	0.000280114	0.121059	0.247218	0.324999
9	129420	11	151749	7.91268e-05	1.20969e-05	0.00141162	0.0806835	0.084292	0.196338
9	129420	12	139683	9.8754e-05	8.8702e-06	0.000185196	0.133694	0.147264	0.207652
9	129420	13	113388	9.90905e-05	1.02467e-05	0.000319879	0.117923	0.144034	0.229461
9	129420	14	97335	0.000114434	1.11283e-05	0.000252188	0.126348	0.0591748	0.0498136
9	129420	15	85307	9.00897e-05	1.03792e-05	0.000484836	0.10611	1.79603	0.477861
9	129420	16	91985	9.97868e-05	9.6333e-06	0.000245141	0.125757	0.133331	0.199492
9	129420	17	79449	0.000120119	1.12644e-05	0.000219006	0.131298	0.0501835	0.0295122
9	129420	18	87103	9.43066e-05	1.03149e-05	0.000397146	0.1117	0.319711	0.372212
9	129420	19	72789	9.54727e-05	1.14479e-05	0.000564919	0.102791	0.246697	0.349155
9	129420	1	225957	0.000111191	7.11651e-06	4.89938e-05	0.181592	0.0629318	0.0223816
9	129420	20	68836	0.000122778	1.31356e-05	0.000364749	0.116224	0.0475183	0.035379
9	129420	21	45046	9.60012e-05	1.39078e-05	0.00115506	0.0862198	0.226316	0.361298
9	129420	22	40368	9.99319e-05	1.34008e-05	0.000863919	0.0930786	0.135136	0.264416
9	129420	2	241232	9.64565e-05	6.99437e-06	8.01155e-05	0.159661	0.194058	0.228435
9	129420	3	212659	0.000100807	7.85437e-06	0.000106225	0.151461	0.117685	0.13376
9	129420	4	222221	9.23438e-05	7.98674e-06	0.000159814	0.136731	0.665508	0.423625
9	129420	5	193619	0.000110079	8.89282e-06	0.000122406	0.148537	0.0680841	0.0472843
9	129420	6	206161	0.000101945	1.01628e-05	0.000277631	0.121981	0.110231	0.165269
9	129420	7	177390	9.79061e-05	8.60574e-06	0.000170212	0.135987	0.162435	0.224797
9	129420	8	163434	0.000108078	8.72385e-06	0.000122003	0.148416	0.0744365	0.0584669
9	129420	9	129420	0.00075094	1.26363e-05	2.4008e-07	1	0	0

## Sheet: CLM
unscale:	chr1	chr2	chr3	chr4	chr5	chr6	chr7	chr8	chr9	chr10	chr11	chr12	chr13	chr14	chr15	chr16	chr17	chr18	chr19	chr20	chr21	chr22
chr1	0.000836767	0.000195079	0.000195198	0.000179245	0.000186715	0.000183263	0.000201462	0.00020318	0.000181822	0.000170792	0.000177598	0.000175703	0.000166273	0.00018929	0.000150221	0.00019062	0.000201226	0.00018499	0.000153526	0.000191242	0.00017194	0.000190412
chr2	0.000195079	0.000795705	0.000168606	0.000186034	0.000188609	0.000192177	0.000173224	0.000210749	0.000209982	0.000191969	0.000153737	0.000170796	0.000155232	0.000154888	0.000195386	0.000184364	0.000210638	0.00018128	0.000129043	0.000169058	0.000134271	0.000242677
chr3	0.000195198	0.000168606	0.000968071	0.000158562	0.00015715	0.000167812	0.000165702	0.00017093	0.000181528	0.000184796	0.000168966	0.000177357	0.000160954	0.00018472	0.000166022	0.000133779	0.000162283	0.000201638	0.000128254	0.000139707	0.000162564	0.000211944
chr4	0.000179245	0.000186034	0.000158562	0.00102476	0.000177337	0.000195399	0.000167325	0.000164076	0.000158328	0.000181134	0.000184767	0.000157216	0.000207754	0.000142464	0.000143487	0.000144021	0.000201383	0.000194941	0.000168737	0.000141975	0.000173793	0.00024093
chr5	0.000186715	0.000188609	0.00015715	0.000177337	0.00106365	0.000188886	0.000154812	0.000168964	0.000155571	0.000195403	0.000151801	0.000164137	0.000180254	0.000163158	0.000155022	0.000215897	0.000198264	0.000191311	0.000131977	0.000192593	0.000118601	0.000177391
chr6	0.000183263	0.000192177	0.000167812	0.000195399	0.000188886	0.00125821	0.000151701	0.000219649	0.000213242	0.00018754	0.000174405	0.000164133	0.000181237	0.000159235	0.00015448	0.000182087	0.000190242	0.000171563	0.000131441	0.000200387	0.000180802	0.000199221
chr7	0.000201462	0.000173224	0.000165702	0.000167325	0.000154812	0.000151701	0.000979415	0.000172475	0.00014631	0.000165979	0.00016717	0.000159013	0.000150806	0.000157449	0.000160439	0.000164084	0.000147385	0.000146773	0.000137782	0.000185988	0.000163908	0.000204923
chr8	0.00020318	0.000210749	0.00017093	0.000164076	0.000168964	0.000219649	0.000172475	0.00122962	0.000187636	0.000232341	0.000158462	0.000192547	0.000171118	0.000222407	0.000157519	0.000180259	0.000228095	0.000219034	0.000194356	0.000197951	0.000165933	0.000198799
chr9	0.000181822	0.000209982	0.000181528	0.000158328	0.000155571	0.000213242	0.00014631	0.000187636	0.00116109	0.000191157	0.000129452	0.000206668	0.00014837	0.000195229	0.000166877	0.000141272	0.00014222	0.000186372	0.000130378	0.000151352	0.000191229	0.000240734
chr10	0.000170792	0.000191969	0.000184796	0.000181134	0.000195403	0.00018754	0.000165979	0.000232341	0.000191157	0.00121469	0.000152863	0.000187103	0.000180057	0.000170004	0.000181425	0.000182615	0.000196891	0.000201757	0.000150298	0.000170829	0.000135204	0.000187449
chr11	0.000177598	0.000153737	0.000168966	0.000184767	0.000151801	0.000174405	0.00016717	0.000158462	0.000129452	0.000152863	0.00164976	0.000150423	0.000161789	0.000128572	0.000180052	0.000177192	0.00019446	0.000133503	0.000125115	0.000179464	0.000128315	0.000190419
chr12	0.000175703	0.000170796	0.000177357	0.000157216	0.000164137	0.000164133	0.000159013	0.000192547	0.000206668	0.000187103	0.000150423	0.00115971	0.000155808	0.000173586	0.000144134	0.000154385	0.000223104	0.000161171	0.00013721	0.000174707	0.000147637	0.000159865
chr13	0.000166273	0.000155232	0.000160954	0.000207754	0.000180254	0.000181237	0.000150806	0.000171118	0.00014837	0.000180057	0.000161789	0.000155808	0.00138066	0.000182079	0.000173659	0.000125293	0.000222037	0.000185243	0.000181348	0.000149308	0.000129986	0.000209276
chr14	0.00018929	0.000154888	0.00018472	0.000142464	0.000163158	0.000159235	0.000157449	0.000222407	0.000195229	0.000170004	0.000128572	0.000173586	0.000182079	0.00161493	0.000165759	0.000205263	0.000172185	0.000185082	0.000199619	0.000192877	0.000175629	0.000165151
chr15	0.000150221	0.000195386	0.000166022	0.000143487	0.000155022	0.00015448	0.000160439	0.000157519	0.000166877	0.000181425	0.000180052	0.000144134	0.000173659	0.000165759	0.00158364	0.000165887	0.000154714	0.000180888	0.000170084	0.000204654	0.000101904	0.00018028
chr16	0.00019062	0.000184364	0.000133779	0.000144021	0.000215897	0.000182087	0.000164084	0.000180259	0.000141272	0.000182615	0.000177192	0.000154385	0.000125293	0.000205263	0.000165887	0.00146175	0.000212464	0.000177579	0.000187031	0.000151201	0.000152473	0.000134278
chr17	0.000201226	0.000210638	0.000162283	0.000201383	0.000198264	0.000190242	0.000147385	0.000228095	0.00014222	0.000196891	0.00019446	0.000223104	0.000222037	0.000172185	0.000154714	0.000212464	0.00161569	0.000168551	0.000201269	0.000151724	0.000152864	0.000124699
chr18	0.00018499	0.00018128	0.000201638	0.000194941	0.000191311	0.000171563	0.000146773	0.000219034	0.000186372	0.000201757	0.000133503	0.000161171	0.000185243	0.000185082	0.000180888	0.000177579	0.000168551	0.00163178	0.000142047	0.000171005	0.000204578	0.000230433
chr19	0.000153526	0.000129043	0.000128254	0.000168737	0.000131977	0.000131441	0.000137782	0.000194356	0.000130378	0.000150298	0.000125115	0.00013721	0.000181348	0.000199619	0.000170084	0.000187031	0.000201269	0.000142047	0.00162885	0.000114556	0.000106628	0.000116811
chr20	0.000191242	0.000169058	0.000139707	0.000141975	0.000192593	0.000200387	0.000185988	0.000197951	0.000151352	0.000170829	0.000179464	0.000174707	0.000149308	0.000192877	0.000204654	0.000151201	0.000151724	0.000171005	0.000114556	0.00182343	0.000135217	0.000193424
chr21	0.00017194	0.000134271	0.000162564	0.000173793	0.000118601	0.000180802	0.000163908	0.000165933	0.000191229	0.000135204	0.000128315	0.000147637	0.000129986	0.000175629	0.000101904	0.000152473	0.000152864	0.000204578	0.000106628	0.000135217	0.00246541	0.000173826
chr22	0.000190412	0.000242677	0.000211944	0.00024093	0.000177391	0.000199221	0.000204923	0.000198799	0.000240734	0.000187449	0.000190419	0.000159865	0.000209276	0.000165151	0.00018028	0.000134278	0.000124699	0.000230433	0.000116811	0.000193424	0.000173826	0.00245665
scale:	chr1	chr2	chr3	chr4	chr5	chr6	chr7	chr8	chr9	chr10	chr11	chr12	chr13	chr14	chr15	chr16	chr17	chr18	chr19	chr20	chr21	chr22
chr1	1	0.240334	0.217985	0.194508	0.198923	0.179426	0.223774	0.201338	0.185571	0.170318	0.151861	0.179389	0.155602	0.163788	0.131329	0.17346	0.1742	0.159293	0.132412	0.155855	0.120571	0.133834
chr2	0.240334	1	0.193078	0.207011	0.206052	0.192939	0.197303	0.21415	0.219763	0.196306	0.134801	0.178815	0.148965	0.13743	0.17516	0.172035	0.186987	0.160069	0.114127	0.141281	0.0965513	0.174908
chr3	0.217985	0.193078	1	0.159936	0.155623	0.152717	0.17108	0.157441	0.172211	0.171293	0.134295	0.168314	0.140007	0.148567	0.134912	0.113155	0.130585	0.161389	0.102818	0.10583	0.105961	0.138468
chr4	0.194508	0.207011	0.159936	1	0.170647	0.172793	0.16787	0.146853	0.145953	0.16315	0.1427	0.14498	0.175606	0.111341	0.113302	0.118372	0.157464	0.151617	0.131446	0.104506	0.110076	0.152953
chr5	0.198923	0.206052	0.155623	0.170647	1	0.163991	0.152486	0.148473	0.140799	0.172795	0.115104	0.148605	0.149585	0.12519	0.12018	0.174216	0.152201	0.146082	0.100937	0.139183	0.0737504	0.110564
chr6	0.179426	0.192939	0.152717	0.172793	0.163991	1	0.137316	0.177373	0.177357	0.152405	0.121528	0.13656	0.138215	0.112281	0.110057	0.135027	0.13421	0.120388	0.0923825	0.133083	0.10332	0.114109
chr7	0.223774	0.197303	0.17108	0.16787	0.152486	0.137316	1	0.158013	0.138057	0.153027	0.132156	0.150096	0.130477	0.125955	0.129676	0.138044	0.117961	0.116846	0.109864	0.140134	0.106264	0.133163
chr8	0.201338	0.21415	0.157441	0.146853	0.148473	0.177373	0.158013	1	0.157953	0.191103	0.111758	0.162144	0.132081	0.158727	0.113583	0.135293	0.162866	0.155564	0.138259	0.133059	0.095973	0.115248
chr9	0.185571	0.219763	0.172211	0.145953	0.140799	0.177357	0.138057	0.157953	1	0.161938	0.0940329	0.179249	0.117952	0.143504	0.123935	0.109208	0.10459	0.136331	0.0955242	0.104783	0.113916	0.143739
chr10	0.170318	0.196306	0.171293	0.16315	0.172795	0.152405	0.153027	0.191103	0.161938	1	0.108493	0.15856	0.139863	0.122098	0.131651	0.137931	0.141477	0.144203	0.107595	0.115556	0.0786961	0.109358
chr11	0.151861	0.134801	0.134295	0.1427	0.115104	0.121528	0.132156	0.111758	0.0940329	0.108493	1	0.109305	0.107759	0.079179	0.112031	0.114758	0.119813	0.0818183	0.0768006	0.104094	0.0640403	0.0952559
chr12	0.179389	0.178815	0.168314	0.14498	0.148605	0.13656	0.150096	0.162144	0.179249	0.15856	0.109305	1	0.123909	0.127641	0.107082	0.119387	0.164132	0.117938	0.100565	0.120995	0.0879794	0.0954872
chr13	0.155602	0.148965	0.140007	0.175606	0.149585	0.138215	0.130477	0.132081	0.117952	0.139863	0.107759	0.123909	1	0.122719	0.118257	0.0888084	0.149723	0.124247	0.121831	0.0947802	0.0710005	0.114575
chr14	0.163788	0.13743	0.148567	0.111341	0.12519	0.112281	0.125955	0.158727	0.143504	0.122098	0.079179	0.127641	0.122719	1	0.104368	0.134524	0.107354	0.114781	0.123995	0.113207	0.0886993	0.0836009
chr15	0.131329	0.17516	0.134912	0.113302	0.12018	0.110057	0.129676	0.113583	0.123935	0.131651	0.112031	0.107082	0.118257	0.104368	1	0.109844	0.0974608	0.113343	0.106744	0.121365	0.0519984	0.0922053
chr16	0.17346	0.172035	0.113155	0.118372	0.174216	0.135027	0.138044	0.135293	0.109208	0.137931	0.114758	0.119387	0.0888084	0.134524	0.109844	1	0.139311	0.115818	0.122178	0.0933313	0.0809832	0.0714846
chr17	0.1742	0.186987	0.130585	0.157464	0.152201	0.13421	0.117961	0.162866	0.10459	0.141477	0.119813	0.164132	0.149723	0.107354	0.0974608	0.139311	1	0.10458	0.12508	0.0890964	0.0772398	0.0631543
chr18	0.159293	0.160069	0.161389	0.151617	0.146082	0.120388	0.116846	0.155564	0.136331	0.144203	0.0818183	0.117938	0.124247	0.114781	0.113343	0.115818	0.10458	1	0.087807	0.0998845	0.10282	0.116083
chr19	0.132412	0.114127	0.102818	0.131446	0.100937	0.0923825	0.109864	0.138259	0.0955242	0.107595	0.0768006	0.100565	0.121831	0.123995	0.106744	0.122178	0.12508	0.087807	1	0.0670199	0.0536768	0.058939
chr20	0.155855	0.141281	0.10583	0.104506	0.139183	0.133083	0.140134	0.133059	0.104783	0.115556	0.104094	0.120995	0.0947802	0.113207	0.121365	0.0933313	0.0890964	0.0998845	0.0670199	1	0.0643187	0.0922195
chr21	0.120571	0.0965513	0.105961	0.110076	0.0737504	0.10332	0.106264	0.095973	0.113916	0.0786961	0.0640403	0.0879794	0.0710005	0.0886993	0.0519984	0.0809832	0.0772398	0.10282	0.0536768	0.0643187	1	0.0713111
chr22	0.133834	0.174908	0.138468	0.152953	0.110564	0.114109	0.133163	0.115248	0.143739	0.109358	0.0952559	0.0954872	0.114575	0.0836009	0.0922053	0.0714846	0.0631543	0.116083	0.058939	0.0922195	0.0713111	1
raw result:
Tagi	SNPi	Tagj	SNPj	rsq	sd	pval	rsq_s	sd_s	pval_s
10	152199	10	152199	0.00121469	2.35621e-05	4.23675e-07	1	0	0
11	151749	10	152199	0.000152863	1.96872e-05	0.000741468	0.108493	0.0537413	0.0568259
11	151749	11	151749	0.00164976	3.28685e-05	4.71429e-07	1	0	0
12	139684	10	152199	0.000187103	1.62783e-05	0.000163541	0.15856	0.034665	0.00511462
12	139684	11	151749	0.000150423	1.9189e-05	0.000715106	0.109305	0.0562356	0.0619252
12	139684	12	139684	0.00115971	2.23862e-05	4.15491e-07	1	0	0
13	113390	10	152199	0.000180057	1.79007e-05	0.000274709	0.139863	0.037253	0.0099356
13	113390	11	151749	0.000161789	2.11214e-05	0.000780578	0.107759	0.0467316	0.0412009
13	113390	12	139684	0.000155808	1.74324e-05	0.000433298	0.123909	0.0505598	0.0351943
13	113390	13	113390	0.00138066	2.71124e-05	4.4497e-07	1	0	0
14	97333	10	152199	0.000170004	1.94728e-05	0.000474172	0.122098	0.0417142	0.0214707
14	97333	11	151749	0.000128572	2.29779e-05	0.00250342	0.079179	0.118134	0.269705
14	97333	12	139684	0.000173586	1.89842e-05	0.000396979	0.127641	0.0399704	0.0165546
14	97333	13	113390	0.000182079	2.08941e-05	0.000477508	0.122719	0.0370729	0.0148243
14	97333	14	97333	0.00161493	3.21237e-05	4.68445e-07	1	0	0
15	85305	10	152199	0.000181425	1.92777e-05	0.000355268	0.131651	0.0370249	0.0118382
15	85305	11	151749	0.000180052	2.27585e-05	0.000690569	0.112031	0.0380106	0.0210397
15	85305	12	139684	0.000144134	1.87694e-05	0.000773187	0.107082	0.0648561	0.0870339
15	85305	13	113390	0.000173659	2.06697e-05	0.000549196	0.118257	0.040293	0.0213022
15	85305	14	97333	0.000165759	2.2491e-05	0.000903105	0.104368	0.0445544	0.0395817
15	85305	15	85305	0.00158364	3.14542e-05	4.65664e-07	1	0	0
16	91988	10	152199	0.000182615	1.84648e-05	0.000293306	0.137931	0.0364984	0.00972535
16	91988	11	151749	0.000177192	2.17948e-05	0.000622558	0.114758	0.0389533	0.0210673
16	91988	12	139684	0.000154385	1.79798e-05	0.000505314	0.119387	0.0519923	0.0416417
16	91988	13	113390	0.000125293	1.97759e-05	0.00158882	0.0888084	0.144898	0.286537
16	91988	14	97333	0.000205263	2.15702e-05	0.000340396	0.134524	0.0313122	0.00634184
16	91988	15	85305	0.000165887	2.13146e-05	0.000734916	0.109844	0.0443222	0.0341674
16	91988	16	91988	0.00146175	2.88469e-05	4.5384e-07	1	0	0
17	79446	10	152199	0.000196891	1.94999e-05	0.000270687	0.141477	0.0327447	0.00622072
17	79446	11	151749	0.00019446	2.30153e-05	0.00053748	0.119813	0.0337783	0.0119308
17	79446	12	139684	0.000223104	1.90397e-05	0.00015168	0.164132	0.0281008	0.00214184
17	79446	13	113390	0.000222037	2.09381e-05	0.000223798	0.149723	0.028529	0.00315269
17	79446	14	97333	0.000172185	2.27381e-05	0.000815238	0.107354	0.0412697	0.0299837
17	79446	15	85305	0.000154714	2.24914e-05	0.0011701	0.0974608	0.0527061	0.0690636
17	79446	16	91988	0.000212464	2.15829e-05	0.000298618	0.139311	0.0300617	0.00488832
17	79446	17	79446	0.00161569	3.21398e-05	4.68511e-07	1	0	0
18	87104	10	152199	0.000201757	1.96084e-05	0.000251599	0.144203	0.0316959	0.00521047
18	87104	11	151749	0.000133503	2.31072e-05	0.00222859	0.0818183	0.0929707	0.214266
18	87104	12	139684	0.000161171	1.9082e-05	0.000538196	0.117938	0.0467862	0.032651
18	87104	13	113390	0.000185243	2.1013e-05	0.000456821	0.124247	0.0360801	0.013103
18	87104	14	97333	0.000185082	2.28678e-05	0.000633289	0.114781	0.0363776	0.0171698
18	87104	15	85305	0.000180888	2.26258e-05	0.000663596	0.113343	0.0377551	0.0199306
18	87104	16	91988	0.000177579	2.16675e-05	0.000603766	0.115818	0.0388454	0.0203393
18	87104	17	79446	0.000168551	2.2863e-05	0.00090208	0.10458	0.0430893	0.0361051
18	87104	18	87104	0.00163178	3.2484e-05	4.69902e-07	1	0	0
19	72786	10	152199	0.000150298	1.95518e-05	0.00077016	0.107595	0.0565954	0.0650343
19	72786	11	151749	0.000125115	2.30836e-05	0.00280833	0.0768006	0.14844	0.316092
19	72786	12	139684	0.00013721	1.90533e-05	0.000985362	0.100565	0.0796738	0.137725
19	72786	13	113390	0.000181348	2.09898e-05	0.000493489	0.121831	0.0373734	0.0155431
19	72786	14	97333	0.000199619	2.28573e-05	0.000473563	0.123995	0.0326248	0.00954662
19	72786	15	85305	0.000170084	2.25972e-05	0.000834131	0.106744	0.0422919	0.0325403
19	72786	16	91988	0.000187031	2.16535e-05	0.000494013	0.122178	0.0356769	0.0133342
19	72786	17	79446	0.000201269	2.28644e-05	0.000459398	0.12508	0.032298	0.00897618
19	72786	18	87104	0.000142047	2.29516e-05	0.0017322	0.087807	0.0697595	0.138295
19	72786	19	72786	0.00162885	3.24213e-05	4.69651e-07	1	0	0
1	225955	10	152199	0.000170792	1.35318e-05	0.000113425	0.170318	0.0397499	0.00639973
1	225955	11	151749	0.000177598	1.59788e-05	0.000186407	0.151861	0.0374543	0.00770887
1	225955	12	139684	0.000175703	1.31963e-05	9.19723e-05	0.179389	0.0375661	0.00440292
1	225955	13	113390	0.000166273	1.45076e-05	0.000165383	0.155602	0.0423173	0.0106296
1	225955	14	97333	0.00018929	1.58093e-05	0.000139422	0.163788	0.0337473	0.00415959
1	225955	15	85305	0.000150221	1.56122e-05	0.000326146	0.131329	0.0552363	0.0380943
1	225955	16	91988	0.00019062	1.49874e-05	0.000110066	0.17346	0.0332592	0.00322386
1	225955	17	79446	0.000201226	1.58274e-05	0.000110236	0.1742	0.0309789	0.00245901
1	225955	18	87104	0.00018499	1.58926e-05	0.000155684	0.159293	0.0350033	0.00520569
1	225955	19	72786	0.000153526	1.58519e-05	0.000318029	0.132412	0.0519001	0.0316096
1	225955	1	225955	0.000836767	1.54782e-05	3.50421e-07	1	0	0
20	68828	10	152199	0.000170829	2.07787e-05	0.000596601	0.115556	0.0415358	0.0248561
20	68828	11	151749	0.000179464	2.45404e-05	0.000929933	0.104094	0.0384384	0.0268223
20	68828	12	139684	0.000174707	2.02571e-05	0.000496861	0.120995	0.0397058	0.0190648
20	68828	13	113390	0.000149308	2.22763e-05	0.00128918	0.0947802	0.0583779	0.0898957
20	68828	14	97333	0.000192877	2.42704e-05	0.000678899	0.113207	0.0343451	0.0150205
20	68828	15	85305	0.000204654	2.40264e-05	0.000521089	0.121365	0.0317164	0.00933657
20	68828	16	91988	0.000151201	2.29781e-05	0.00138064	0.0933313	0.0563416	0.0864784
20	68828	17	79446	0.000151724	2.42536e-05	0.00166503	0.0890964	0.0560051	0.0934249
20	68828	18	87104	0.000171005	2.43917e-05	0.00108976	0.0998845	0.0420471	0.0381797
20	68828	19	72786	0.000114556	2.43525e-05	0.00464013	0.0670199	1.18024	0.47872
20	68828	1	225955	0.000191242	1.68677e-05	0.000172508	0.155855	0.0334262	0.00478523
20	68828	20	68828	0.00182343	3.65836e-05	4.84779e-07	1	0	0
21	44966	10	152199	0.000135204	2.43492e-05	0.00257384	0.0786961	0.0869527	0.208312
21	44966	11	151749	0.000128315	2.87569e-05	0.00557128	0.0640403	0.121613	0.313164
21	44966	12	139684	0.000147637	2.37374e-05	0.00170099	0.0879794	0.0605536	0.109951
21	44966	13	113390	0.000129986	2.61181e-05	0.00380717	0.0710005	0.110282	0.277378
21	44966	14	97333	0.000175629	2.8444e-05	0.00174716	0.0886993	0.0403293	0.0463585
21	44966	15	85305	0.000101904	2.8131e-05	0.0111542	0.0519984	0.129788	0.35458
21	44966	16	91988	0.000152473	2.69459e-05	0.00240381	0.0809832	0.0554853	0.109094
21	44966	17	79446	0.000152864	2.84418e-05	0.00289466	0.0772398	0.0553115	0.117543
21	44966	18	87104	0.000204578	2.86207e-05	0.00101334	0.10282	0.0320822	0.0163738
21	44966	19	72786	0.000106628	2.85598e-05	0.0101176	0.0536768	0.234213	0.414985
21	44966	1	225955	0.00017194	1.97532e-05	0.000479611	0.120571	0.0404045	0.0202872
21	44966	20	68828	0.000135217	3.03394e-05	0.00559397	0.0643187	0.08851	0.253833
21	44966	21	44966	0.00246541	5.03159e-05	5.19018e-07	1	0	0
22	40355	10	152199	0.000187449	2.43275e-05	0.000763353	0.109358	0.0357036	0.0187752
22	40355	11	151749	0.000190419	2.87262e-05	0.00134343	0.0952559	0.035336	0.0271673
22	40355	12	139684	0.000159865	2.36979e-05	0.00125854	0.0954872	0.0483994	0.0598857
22	40355	13	113390	0.000209276	2.61087e-05	0.000657076	0.114575	0.0309823	0.0104353
22	40355	14	97333	0.000165151	2.83862e-05	0.00217266	0.0836009	0.0456041	0.070353
22	40355	15	85305	0.00018028	2.80964e-05	0.00151596	0.0922053	0.0385289	0.0374557
22	40355	16	91988	0.000134278	2.68911e-05	0.0037627	0.0714846	0.0910637	0.238171
22	40355	17	79446	0.000124699	2.8383e-05	0.00587554	0.0631543	0.155518	0.352731
22	40355	18	87104	0.000230433	2.8589e-05	0.000643338	0.116083	0.0281386	0.00727408
22	40355	19	72786	0.000116811	2.85065e-05	0.00744058	0.058939	0.461922	0.452313
22	40355	1	225955	0.000190412	1.9731e-05	0.000322464	0.133834	0.0340087	0.00851362
22	40355	20	68828	0.000193424	3.03054e-05	0.00154608	0.0922195	0.0347416	0.028359
22	40355	21	44966	0.000173826	3.55243e-05	0.00404184	0.0713111	0.0417253	0.0813097
22	40355	22	40355	0.00245665	5.01286e-05	5.18662e-07	1	0	0
2	241229	10	152199	0.000191969	1.3169e-05	6.4402e-05	0.196306	0.0324037	0.00187382
2	241229	11	151749	0.000153737	1.55021e-05	0.000290195	0.134801	0.0513958	0.0293135
2	241229	12	139684	0.000170796	1.28131e-05	9.15613e-05	0.178815	0.0394853	0.00529416
2	241229	13	113390	0.000155232	1.40827e-05	0.000192521	0.148965	0.0497257	0.020055
2	241229	14	97333	0.000154888	1.53264e-05	0.000269761	0.13743	0.0503647	0.0262568
2	241229	15	85305	0.000195386	1.52039e-05	0.000105691	0.17516	0.0320669	0.00273094
2	241229	16	91988	0.000184364	1.45513e-05	0.000111737	0.172035	0.0348742	0.00392797
2	241229	17	79446	0.000210638	1.5388e-05	8.24908e-05	0.186987	0.029114	0.00151064
2	241229	18	87104	0.00018128	1.54334e-05	0.000150272	0.160069	0.0360301	0.00565543
2	241229	19	72786	0.000129043	1.5386e-05	0.000552862	0.114127	0.110611	0.180236
2	241229	1	225955	0.000195079	1.07016e-05	2.66324e-05	0.240334	0.0307667	0.000724709
2	241229	20	68828	0.000169058	1.63637e-05	0.000247659	0.141281	0.0412028	0.013281
2	241229	21	44966	0.000134271	1.91678e-05	0.00109311	0.0965513	0.0876827	0.16632
2	241229	22	40355	0.000242677	1.92294e-05	0.000113478	0.174908	0.0255654	0.00119409
2	241229	2	241229	0.000795705	1.45998e-05	3.39257e-07	1	0	0
3	212652	10	152199	0.000184796	1.47177e-05	0.000115763	0.171293	0.0349123	0.00400362
3	212652	11	151749	0.000168966	1.73564e-05	0.000311754	0.134295	0.0416293	0.016049
3	212652	12	139684	0.000177357	1.43398e-05	0.000122799	0.168314	0.037345	0.00538236
3	212652	13	113390	0.000160954	1.57614e-05	0.000259078	0.140007	0.0460385	0.0191806
3	212652	14	97333	0.00018472	1.71724e-05	0.000211727	0.148567	0.035446	0.0068957
3	212652	15	85305	0.000166022	1.69776e-05	0.000306394	0.134912	0.0431965	0.0177082
3	212652	16	91988	0.000133779	1.62437e-05	0.000592624	0.113155	0.0891518	0.13659
3	212652	17	79446	0.000162283	1.71587e-05	0.000348554	0.130585	0.0454974	0.0227306
3	212652	18	87104	0.000201638	1.7286e-05	0.000154392	0.161389	0.0312514	0.00333925
3	212652	19	72786	0.000128254	1.7219e-05	0.000867776	0.102818	0.117369	0.215237
3	212652	1	225955	0.000195198	1.19609e-05	4.12549e-05	0.217985	0.0312713	0.00111338
3	212652	20	68828	0.000139707	1.82937e-05	0.000789546	0.10583	0.0729129	0.110141
3	212652	21	44966	0.000162564	2.1462e-05	0.000814434	0.105961	0.0459602	0.04122
3	212652	22	40355	0.000211944	2.14611e-05	0.000294934	0.138468	0.0298674	0.0048813
3	212652	2	241229	0.000168606	1.15843e-05	6.47972e-05	0.193078	0.0400315	0.0042517
3	212652	3	212652	0.000968071	1.82868e-05	3.81079e-07	1	0	0
4	222220	10	152199	0.000181134	1.51915e-05	0.000141719	0.16315	0.0362186	0.00539232
4	222220	11	151749	0.000184767	1.79341e-05	0.000250352	0.1427	0.0355506	0.00797173
4	222220	12	139684	0.000157216	1.47886e-05	0.000221644	0.14498	0.0485333	0.0202245
4	222220	13	113390	0.000207754	1.63213e-05	0.00010972	0.175606	0.0299531	0.00211283
4	222220	14	97333	0.000142464	1.7703e-05	0.000647216	0.111341	0.0672299	0.0865194
4	222220	15	85305	0.000143487	1.75181e-05	0.000605128	0.113302	0.0654096	0.0791382
4	222220	16	91988	0.000144021	1.6777e-05	0.0005058	0.118372	0.0643049	0.0697346
4	222220	17	79446	0.000201383	1.77521e-05	0.00017213	0.157464	0.0314204	0.00371481
4	222220	18	87104	0.000194941	1.78393e-05	0.000199137	0.151617	0.0328392	0.00495194
4	222220	19	72786	0.000168737	1.77991e-05	0.000345399	0.131446	0.0419662	0.0175554
4	222220	1	225955	0.000179245	1.23251e-05	6.50017e-05	0.194508	0.035925	0.00281918
4	222220	20	68828	0.000141975	1.88911e-05	0.000838887	0.104506	0.0684918	0.100876
4	222220	21	44966	0.000173793	2.21678e-05	0.000714805	0.110076	0.0401502	0.0259099
4	222220	22	40355	0.00024093	2.21918e-05	0.000204248	0.152953	0.0262654	0.00216537
4	222220	2	241229	0.000186034	1.19816e-05	5.02225e-05	0.207011	0.0336084	0.00176294
4	222220	3	212652	0.000158562	1.33703e-05	0.000144734	0.159936	0.0469259	0.0135353
4	222220	4	222220	0.00102476	1.94996e-05	3.92352e-07	1	0	0
5	193606	10	152199	0.000195403	1.55265e-05	0.000114716	0.172795	0.0323121	0.00294738
5	193606	11	151749	0.000151801	1.82886e-05	0.000575235	0.115104	0.0544137	0.0509375
5	193606	12	139684	0.000164137	1.51051e-05	0.000203542	0.148605	0.0438723	0.0138005
5	193606	13	113390	0.000180254	1.66326e-05	0.000205669	0.149585	0.0368823	0.00770135
5	193606	14	97333	0.000163158	1.80867e-05	0.00041818	0.12519	0.0451811	0.0251434
5	193606	15	85305	0.000155022	1.78928e-05	0.000488251	0.12018	0.0512878	0.039548
5	193606	16	91988	0.000215897	1.71948e-05	0.000115765	0.174216	0.0288033	0.00188483
5	193606	17	79446	0.000198264	1.81212e-05	0.000198194	0.152201	0.0321676	0.00454702
5	193606	18	87104	0.000191311	1.82104e-05	0.000232086	0.146082	0.0338297	0.00623276
5	193606	19	72786	0.000131977	1.81567e-05	0.000951404	0.100937	0.0974274	0.179355
5	193606	1	225955	0.000186715	1.2593e-05	6.02363e-05	0.198923	0.0336627	0.00205259
5	193606	20	68828	0.000192593	1.9322e-05	0.000284559	0.139183	0.0336652	0.00722145
5	193606	21	44966	0.000118601	2.26164e-05	0.00316141	0.0737504	0.307291	0.411063
5	193606	22	40355	0.000177391	2.2595e-05	0.000711008	0.110564	0.0387942	0.0231978
5	193606	2	241229	0.000188609	1.22359e-05	5.16814e-05	0.206052	0.0329849	0.00167378
5	193606	3	212652	0.00015715	1.36506e-05	0.000162534	0.155623	0.0481346	0.0159412
5	193606	4	222220	0.000177337	1.41127e-05	0.000115409	0.170647	0.0372667	0.00509524
5	193606	5	193606	0.00106365	2.03313e-05	3.99515e-07	1	0	0
6	206161	10	152199	0.00018754	1.70241e-05	0.000192981	0.152405	0.03466	0.00585863
6	206161	11	151749	0.000174405	2.00844e-05	0.000484029	0.121528	0.0397351	0.0188576
6	206161	12	139684	0.000164133	1.65755e-05	0.000291905	0.13656	0.0442747	0.0183872
6	206161	13	113390	0.000181237	1.82508e-05	0.000288707	0.138215	0.0368843	0.00999726
6	206161	14	97333	0.000159235	1.98466e-05	0.000654681	0.112281	0.0482895	0.0403396
6	206161	15	85305	0.00015448	1.96366e-05	0.000705506	0.110057	0.0522397	0.0514322
6	206161	16	91988	0.000182087	1.88245e-05	0.000319575	0.135027	0.0367146	0.0106228
6	206161	17	79446	0.000190242	1.98736e-05	0.000332694	0.13421	0.0344296	0.00878482
6	206161	18	87104	0.000171563	1.99649e-05	0.000503814	0.120388	0.0410431	0.0213383
6	206161	19	72786	0.000131441	1.9928e-05	0.00136856	0.0923825	0.100748	0.205523
6	206161	1	225955	0.000183263	1.38086e-05	9.31442e-05	0.179426	0.0350359	0.00344016
6	206161	20	68828	0.000200387	2.12076e-05	0.000349827	0.133083	0.0321732	0.00720912
6	206161	21	44966	0.000180802	2.48443e-05	0.000947186	0.10332	0.0378594	0.0262475
6	206161	22	40355	0.000199221	2.48112e-05	0.000652755	0.114109	0.0327667	0.0126476
6	206161	2	241229	0.000192177	1.34248e-05	6.91751e-05	0.192939	0.0323946	0.00199444
6	206161	3	212652	0.000167812	1.49878e-05	0.000181144	0.152717	0.0416999	0.0107684
6	206161	4	222220	0.000195399	1.55032e-05	0.000114053	0.172793	0.0322639	0.00293177
6	206161	5	193606	0.000188886	1.58208e-05	0.000140992	0.163991	0.0339973	0.00425028
6	206161	6	206161	0.00125821	2.4493e-05	4.29722e-07	1	0	0
7	177387	10	152199	0.000165979	1.47964e-05	0.000179834	0.153027	0.0426912	0.0115374
7	177387	11	151749	0.00016717	1.74696e-05	0.000333149	0.132156	0.0426159	0.0180914
7	177387	12	139684	0.000159013	1.44181e-05	0.000192127	0.150096	0.0470463	0.0166017
7	177387	13	113390	0.000150806	1.58592e-05	0.000341359	0.130477	0.0548797	0.0380978
7	177387	14	97333	0.000157449	1.72646e-05	0.000401008	0.125955	0.0490032	0.0309782
7	177387	15	85305	0.000160439	1.70859e-05	0.000358336	0.129676	0.0467534	0.0250723
7	177387	16	91988	0.000164084	1.63662e-05	0.000278214	0.138044	0.0442295	0.0177446
7	177387	17	79446	0.000147385	1.72637e-05	0.000516574	0.117961	0.0594454	0.0591055
7	177387	18	87104	0.000146773	1.73555e-05	0.000535619	0.116846	0.0602788	0.0623011
7	177387	19	72786	0.000137782	1.73353e-05	0.000678555	0.109864	0.0773401	0.114243
7	177387	1	225955	0.000201462	1.20493e-05	3.74889e-05	0.223774	0.0299742	0.000860257
7	177387	20	68828	0.000185988	1.84432e-05	0.000272005	0.140134	0.0353043	0.00827405
7	177387	21	44966	0.000163908	2.16045e-05	0.00080946	0.106264	0.0451651	0.0391379
7	177387	22	40355	0.000204923	2.15952e-05	0.000344112	0.133163	0.0311482	0.00644863
7	177387	2	241229	0.000173224	1.16657e-05	5.98847e-05	0.197303	0.0379797	0.00326935
7	177387	3	212652	0.000165702	1.30405e-05	0.000110475	0.17108	0.0422346	0.00773336
7	177387	4	222220	0.000167325	1.34659e-05	0.000120584	0.16787	0.041512	0.00777695
7	177387	5	193606	0.000154812	1.3739e-05	0.000176711	0.152486	0.0501557	0.0191964
7	177387	6	206161	0.000151701	1.50752e-05	0.000274252	0.137316	0.0536081	0.0312703
7	177387	7	177387	0.000979415	1.85295e-05	3.83419e-07	1	0	0
8	163435	10	152199	0.000232341	1.687e-05	8.05315e-05	0.191103	0.0265881	0.0009925
8	163435	11	151749	0.000158462	1.98228e-05	0.000663867	0.111758	0.048829	0.0419855
8	163435	12	139684	0.000192547	1.63936e-05	0.000150303	0.162144	0.0332188	0.00407706
8	163435	13	113390	0.000171118	1.80142e-05	0.000342743	0.132081	0.040916	0.0160167
8	163435	14	97333	0.000222407	1.96548e-05	0.000173829	0.158727	0.0282567	0.00246831
8	163435	15	85305	0.000157519	1.93917e-05	0.00062459	0.113583	0.0495787	0.0418841
8	163435	16	91988	0.000180259	1.85872e-05	0.000316385	0.135293	0.0373176	0.0111247
8	163435	17	79446	0.000228095	1.96671e-05	0.000157905	0.162866	0.0275444	0.00204809
8	163435	18	87104	0.000219034	1.97597e-05	0.000188362	0.155564	0.0287504	0.00282564
8	163435	19	72786	0.000194356	1.9714e-05	0.000296899	0.138259	0.0333782	0.00717552
8	163435	1	225955	0.00020318	1.36629e-05	5.95369e-05	0.201338	0.0301058	0.00129988
8	163435	20	68828	0.000197951	2.09399e-05	0.000349194	0.133059	0.0326801	0.00760177
8	163435	21	44966	0.000165933	2.45244e-05	0.00124463	0.095973	0.0445402	0.0487304
8	163435	22	40355	0.000198799	2.45e-05	0.000627174	0.115248	0.0328377	0.01234
8	163435	2	241229	0.000210749	1.32857e-05	4.61516e-05	0.21415	0.028616	0.000852459
8	163435	3	212652	0.00017093	1.48028e-05	0.000160625	0.157441	0.0401405	0.00860756
8	163435	4	222220	0.000164076	1.52785e-05	0.000213092	0.146853	0.0439104	0.0143592
8	163435	5	193606	0.000168964	1.56039e-05	0.00020634	0.148473	0.0413437	0.0114687
8	163435	6	206161	0.000219649	1.71773e-05	0.000107776	0.177373	0.0282362	0.00163973
8	163435	7	177387	0.000172475	1.49017e-05	0.000159165	0.158013	0.0394903	0.00805623
8	163435	8	163435	0.00122962	2.38815e-05	4.25791e-07	1	0	0
9	129411	10	152199	0.000191157	1.62933e-05	0.000150956	0.161938	0.0335675	0.00424834
9	129411	11	151749	0.000129452	1.9195e-05	0.00125986	0.0940329	0.110854	0.222037
9	129411	12	139684	0.000206668	1.59029e-05	0.000101153	0.179249	0.0301262	0.00200179
9	129411	13	113390	0.00014837	1.74401e-05	0.000523539	0.117952	0.0583643	0.0566863
9	129411	14	97333	0.000195229	1.90152e-05	0.000253729	0.143504	0.0330422	0.00611173
9	129411	15	85305	0.000166877	1.87935e-05	0.000444333	0.123935	0.0432493	0.0228355
9	129411	16	91988	0.000141272	1.79859e-05	0.000709733	0.109208	0.069845	0.0964798
9	129411	17	79446	0.00014222	1.89845e-05	0.000849125	0.10459	0.0683042	0.100232
9	129411	18	87104	0.000186372	1.91129e-05	0.000309778	0.136331	0.035418	0.00915751
9	129411	19	72786	0.000130378	1.90641e-05	0.00119585	0.0955242	0.105822	0.208868
9	129411	1	225955	0.000181822	1.32119e-05	8.07727e-05	0.185571	0.0353826	0.00316001
9	129411	20	68828	0.000151352	2.02573e-05	0.000857691	0.104783	0.0555295	0.0661051
9	129411	21	44966	0.000191229	2.37766e-05	0.00064867	0.113916	0.0345718	0.0150361
9	129411	22	40355	0.000240734	2.37815e-05	0.000268033	0.143739	0.0265325	0.00281319
9	129411	2	241229	0.000209982	1.28754e-05	4.13648e-05	0.219763	0.028658	0.000777299
9	129411	3	212652	0.000181528	1.43536e-05	0.000112538	0.172211	0.03588	0.00432521
9	129411	4	222220	0.000158328	1.47992e-05	0.000216251	0.145953	0.0476826	0.0188121
9	129411	5	193606	0.000155571	1.5109e-05	0.000250911	0.140799	0.05004	0.0240668
9	129411	6	206161	0.000213242	1.66375e-05	0.000106798	0.177357	0.0291203	0.0018375
9	129411	7	177387	0.00014631	1.44197e-05	0.000265607	0.138057	0.0599679	0.0413705
9	129411	8	163435	0.000187636	1.63991e-05	0.000166471	0.157953	0.0345398	0.00511854
9	129411	9	129411	0.00116109	2.24158e-05	4.15705e-07	1	0	0

## Sheet: ESN
unscale:	chr1	chr2	chr3	chr4	chr5	chr6	chr7	chr8	chr9	chr10	chr11	chr12	chr13	chr14	chr15	chr16	chr17	chr18	chr19	chr20	chr21	chr22
chr1	0.00038686	0.000116879	0.000127212	0.000119637	0.00010734	0.000105964	0.000111508	0.000111164	0.000122159	0.000120704	0.000106336	0.000106945	0.000111591	0.000116864	0.000122163	0.000106951	0.000132879	0.000118395	0.000118562	0.000124214	0.000128497	0.000113718
chr2	0.000116879	0.000371822	0.000123861	0.000116888	0.000110471	0.000113045	0.000117027	0.000122617	0.000120919	0.000117669	0.000110676	0.000105631	0.00011048	0.000133889	0.000116794	9.93396e-05	0.000125496	0.000123361	0.0001162	0.000132228	0.000112885	0.000112828
chr3	0.000127212	0.000123861	0.000467584	0.000132611	0.000102851	0.000116354	0.00011411	0.000137681	0.000121957	0.00012807	0.000115146	0.000118492	0.000117716	0.000139218	0.000130646	0.000107964	0.000126298	0.000118124	0.000132574	0.000142499	0.000129592	0.00013906
chr4	0.000119637	0.000116888	0.000132611	0.000484161	0.000109702	0.000110584	0.000127445	0.000127336	0.000116316	0.000131516	0.000111137	0.00011117	0.000117096	0.000127354	0.000130548	0.000117269	0.000149079	0.000116832	0.000134025	0.000159459	0.000126023	0.00012269
chr5	0.00010734	0.000110471	0.000102851	0.000109702	0.000497608	0.000111576	0.000109912	0.000100052	0.000118536	0.000103962	0.000111834	9.48843e-05	0.000110974	0.000116455	0.000116435	0.000103132	0.00011741	0.000111702	0.000112022	0.000110949	0.000121523	0.000109404
chr6	0.000105964	0.000113045	0.000116354	0.000110584	0.000111576	0.000777143	0.000118779	0.000100886	0.000122295	9.4147e-05	0.000113557	0.000132835	0.000130963	0.000106971	0.000127762	0.000107176	0.000120151	0.000131419	0.00012047	0.000123175	0.000125527	0.000112572
chr7	0.000111508	0.000117027	0.00011411	0.000127445	0.000109912	0.000118779	0.000529584	0.000129162	0.00011766	0.00012703	0.000108829	0.000125411	0.000110681	0.000124275	0.000125704	0.000103129	0.000125188	0.000128104	0.000122924	0.000116108	9.61159e-05	0.00011559
chr8	0.000111164	0.000122617	0.000137681	0.000127336	0.000100052	0.000100886	0.000129162	0.000506898	0.000129854	0.000128029	0.000110453	0.000118835	0.000123053	0.000128963	0.00013712	0.000110951	0.000123962	0.00012486	0.000126126	0.000144524	0.000115185	0.000117379
chr9	0.000122159	0.000120919	0.000121957	0.000116316	0.000118536	0.000122295	0.00011766	0.000129854	0.000591262	0.000120618	0.000109822	0.000103655	0.000121776	0.000121442	0.000128508	0.000134712	0.000125529	0.000112012	0.000131063	0.000109721	0.00012687	0.000116439
chr10	0.000120704	0.000117669	0.00012807	0.000131516	0.000103962	9.4147e-05	0.00012703	0.000128029	0.000120618	0.000641633	0.000106786	0.000104294	0.000123996	0.00013751	0.000127883	0.000112914	0.000122012	0.000111321	0.000126474	0.000130919	0.000136307	0.000107498
chr11	0.000106336	0.000110676	0.000115146	0.000111137	0.000111834	0.000113557	0.000108829	0.000110453	0.000109822	0.000106786	0.000870192	0.000115258	0.000106563	0.000116472	0.000121272	0.000105495	0.000106554	0.000118484	9.06244e-05	0.000111666	9.74373e-05	0.000109533
chr12	0.000106945	0.000105631	0.000118492	0.00011117	9.48843e-05	0.000132835	0.000125411	0.000118835	0.000103655	0.000104294	0.000115258	0.000573051	0.00011623	0.000110956	0.000124044	0.0001055	0.000125889	0.000120041	0.000108124	0.000110196	0.000106211	0.000102198
chr13	0.000111591	0.00011048	0.000117716	0.000117096	0.000110974	0.000130963	0.000110681	0.000123053	0.000121776	0.000123996	0.000106563	0.00011623	0.000725975	0.000113779	0.000117337	0.000119699	0.000128204	0.000120868	0.00012825	0.000154377	0.000123068	0.000105547
chr14	0.000116864	0.000133889	0.000139218	0.000127354	0.000116455	0.000106971	0.000124275	0.000128963	0.000121442	0.00013751	0.000116472	0.000110956	0.000113779	0.000780844	0.000134103	0.00011496	0.000130116	0.000120591	0.000127267	0.00013453	0.00012591	0.00011645
chr15	0.000122163	0.000116794	0.000130646	0.000130548	0.000116435	0.000127762	0.000125704	0.00013712	0.000128508	0.000127883	0.000121272	0.000124044	0.000117337	0.000134103	0.000758024	9.93134e-05	0.000128313	0.000106515	0.000127498	0.000150774	0.000101644	7.78418e-05
chr16	0.000106951	9.93396e-05	0.000107964	0.000117269	0.000103132	0.000107176	0.000103129	0.000110951	0.000134712	0.000112914	0.000105495	0.0001055	0.000119699	0.00011496	9.93134e-05	0.000588921	0.000112937	0.000117513	0.000122079	0.000118223	0.000114931	0.000102607
chr17	0.000132879	0.000125496	0.000126298	0.000149079	0.00011741	0.000120151	0.000125188	0.000123962	0.000125529	0.000122012	0.000106554	0.000125889	0.000128204	0.000130116	0.000128313	0.000112937	0.000817165	0.000126473	0.000144657	0.000161006	0.000112868	9.45257e-05
chr18	0.000118395	0.000123361	0.000118124	0.000116832	0.000111702	0.000131419	0.000128104	0.00012486	0.000112012	0.000111321	0.000118484	0.000120041	0.000120868	0.000120591	0.000106515	0.000117513	0.000126473	0.000711977	0.00011453	0.00011219	9.86993e-05	0.000121819
chr19	0.000118562	0.0001162	0.000132574	0.000134025	0.000112022	0.00012047	0.000122924	0.000126126	0.000131063	0.000126474	9.06244e-05	0.000108124	0.00012825	0.000127267	0.000127498	0.000122079	0.000144657	0.00011453	0.000956449	0.000156425	0.000126473	0.000118847
chr20	0.000124214	0.000132228	0.000142499	0.000159459	0.000110949	0.000123175	0.000116108	0.000144524	0.000109721	0.000130919	0.000111666	0.000110196	0.000154377	0.00013453	0.000150774	0.000118223	0.000161006	0.00011219	0.000156425	0.000975206	0.00012662	0.000106483
chr21	0.000128497	0.000112885	0.000129592	0.000126023	0.000121523	0.000125527	9.61159e-05	0.000115185	0.00012687	0.000136307	9.74373e-05	0.000106211	0.000123068	0.00012591	0.000101644	0.000114931	0.000112868	9.86993e-05	0.000126473	0.00012662	0.00114778	0.000100473
chr22	0.000113718	0.000112828	0.00013906	0.00012269	0.000109404	0.000112572	0.00011559	0.000117379	0.000116439	0.000107498	0.000109533	0.000102198	0.000105547	0.00011645	7.78418e-05	0.000102607	9.45257e-05	0.000121819	0.000118847	0.000106483	0.000100473	0.00113816
scale:	chr1	chr2	chr3	chr4	chr5	chr6	chr7	chr8	chr9	chr10	chr11	chr12	chr13	chr14	chr15	chr16	chr17	chr18	chr19	chr20	chr21	chr22
chr1	1	0.31169	0.302353	0.27933	0.247346	0.194978	0.249106	0.254015	0.258589	0.244926	0.18503	0.229886	0.213079	0.215274	0.228666	0.227469	0.239547	0.228743	0.197457	0.204927	0.195853	0.17427
chr2	0.31169	1	0.300237	0.278336	0.259618	0.212142	0.266629	0.285754	0.261051	0.243512	0.196408	0.231573	0.21515	0.251538	0.222959	0.215478	0.230733	0.243073	0.19737	0.222484	0.175476	0.176341
chr3	0.302353	0.300237	1	0.281433	0.215424	0.194605	0.23171	0.285965	0.234658	0.236213	0.182119	0.231519	0.20431	0.233104	0.22228	0.208717	0.206954	0.207441	0.200692	0.213689	0.179539	0.193704
chr4	0.27933	0.278336	0.281433	1	0.22572	0.181691	0.254219	0.259812	0.219855	0.238288	0.172675	0.213379	0.199649	0.209476	0.218194	0.222706	0.239972	0.201553	0.199308	0.234902	0.171513	0.167886
chr5	0.247346	0.259618	0.215424	0.22572	1	0.180925	0.216381	0.201475	0.221124	0.185904	0.17149	0.179741	0.186739	0.189047	0.192064	0.193299	0.186526	0.190186	0.164411	0.161306	0.163228	0.14775
chr6	0.194978	0.212142	0.194605	0.181691	0.180925	1	0.186725	0.162224	0.182172	0.134433	0.139047	0.200933	0.175973	0.138665	0.168287	0.160407	0.152422	0.178673	0.141187	0.143001	0.134636	0.121398
chr7	0.249106	0.266629	0.23171	0.254219	0.216381	0.186725	1	0.252153	0.21279	0.220218	0.161787	0.230315	0.180559	0.195583	0.201022	0.187392	0.192811	0.211452	0.174904	0.163653	0.12516	0.151338
chr8	0.254015	0.285754	0.285965	0.259812	0.201475	0.162224	0.252153	1	0.240213	0.227025	0.167955	0.223229	0.205333	0.207603	0.224293	0.206215	0.195289	0.210812	0.183564	0.208364	0.153421	0.157195
chr9	0.258589	0.261051	0.234658	0.219855	0.221124	0.182172	0.21279	0.240213	1	0.198138	0.154703	0.18038	0.188242	0.181103	0.194731	0.231946	0.183198	0.175195	0.176706	0.146542	0.156545	0.144456
chr10	0.244926	0.243512	0.236213	0.238288	0.185904	0.134433	0.220218	0.227025	0.198138	1	0.144194	0.173973	0.183734	0.196569	0.185756	0.18636	0.17069	0.166902	0.163456	0.16761	0.161222	0.127839
chr11	0.18503	0.196408	0.182119	0.172675	0.17149	0.139047	0.161787	0.167955	0.154703	0.144194	1	0.164872	0.135407	0.142775	0.151057	0.14931	0.127828	0.152334	0.100437	0.122594	0.0988286	0.111701
chr12	0.229886	0.231573	0.231519	0.213379	0.179741	0.200933	0.230315	0.223229	0.18038	0.173973	0.164872	1	0.182449	0.168025	0.190875	0.184459	0.186566	0.190659	0.148035	0.149454	0.133081	0.12875
chr13	0.213079	0.21515	0.20431	0.199649	0.186739	0.175973	0.180559	0.205333	0.188242	0.183734	0.135407	0.182449	1	0.153054	0.160386	0.185908	0.168775	0.170529	0.155976	0.185986	0.136978	0.118116
chr14	0.215274	0.251538	0.233104	0.209476	0.189047	0.138665	0.195583	0.207603	0.181103	0.196569	0.142775	0.168025	0.153054	1	0.176836	0.172247	0.165248	0.164136	0.149319	0.156358	0.135197	0.12572
chr15	0.228666	0.222959	0.22228	0.218194	0.192064	0.168287	0.201022	0.224293	0.194731	0.185756	0.151057	0.190875	0.160386	0.176836	1	0.151204	0.165586	0.147314	0.152003	0.178064	0.110902	0.0853937
chr16	0.227469	0.215478	0.208717	0.222706	0.193299	0.160407	0.187392	0.206215	0.231946	0.18636	0.14931	0.184459	0.185908	0.172247	0.151204	1	0.165601	0.184671	0.165373	0.158644	0.142484	0.127898
chr17	0.239547	0.230733	0.206954	0.239972	0.186526	0.152422	0.192811	0.195289	0.183198	0.17069	0.127828	0.186566	0.168775	0.165248	0.165586	0.165601	1	0.168463	0.166097	0.183131	0.118604	0.0998701
chr18	0.228743	0.243073	0.207441	0.201553	0.190186	0.178673	0.211452	0.210812	0.175195	0.166902	0.152334	0.190659	0.170529	0.164136	0.147314	0.184671	0.168463	1	0.140936	0.136759	0.111154	0.137938
chr19	0.197457	0.19737	0.200692	0.199308	0.164411	0.141187	0.174904	0.183564	0.176706	0.163456	0.100437	0.148035	0.155976	0.149319	0.152003	0.165373	0.166097	0.140936	1	0.16437	0.122778	0.116003
chr20	0.204927	0.222484	0.213689	0.234902	0.161306	0.143001	0.163653	0.208364	0.146542	0.16761	0.122594	0.149454	0.185986	0.156358	0.178064	0.158644	0.183131	0.136759	0.16437	1	0.121765	0.102958
chr21	0.195853	0.175476	0.179539	0.171513	0.163228	0.134636	0.12516	0.153421	0.156545	0.161222	0.0988286	0.133081	0.136978	0.135197	0.110902	0.142484	0.118604	0.111154	0.122778	0.121765	1	0.0897508
chr22	0.17427	0.176341	0.193704	0.167886	0.14775	0.121398	0.151338	0.157195	0.144456	0.127839	0.111701	0.12875	0.118116	0.12572	0.0853937	0.127898	0.0998701	0.137938	0.116003	0.102958	0.0897508	1
raw result:
Tagi	SNPi	Tagj	SNPj	rsq	sd	pval	rsq_s	sd_s	pval_s
10	152193	10	152193	0.000641633	1.09565e-05	2.5458e-07	1	0	0
11	151749	10	152193	0.000106786	9.24399e-06	0.000160364	0.144194	0.280246	0.317004
11	151749	11	151749	0.000870192	1.55974e-05	3.08986e-07	1	0	0
12	139684	10	152193	0.000104294	7.23845e-06	6.74286e-05	0.173973	0.556277	0.385051
12	139684	11	151749	0.000115258	8.63844e-06	9.12186e-05	0.164872	0.107591	0.100096
12	139684	12	139684	0.000573051	9.56399e-06	2.32327e-07	1	0	0
13	113389	10	152193	0.000123996	8.33691e-06	5.95026e-05	0.183734	0.0695857	0.0287782
13	113389	11	151749	0.000106563	9.94015e-06	0.000214526	0.135407	0.29691	0.336007
13	113389	12	139684	0.00011623	7.78621e-06	5.86505e-05	0.182449	0.099942	0.0709799
13	113389	13	113389	0.000725975	1.26691e-05	2.77674e-07	1	0	0
14	97333	10	152193	0.00013751	8.70445e-06	4.69076e-05	0.196569	0.0479782	0.00744446
14	97333	11	151749	0.000116472	1.03699e-05	0.000178947	0.142775	0.102462	0.117961
14	97333	12	139684	0.000110956	8.11958e-06	8.30442e-05	0.168025	0.152799	0.166611
14	97333	13	113389	0.000113779	9.34552e-06	0.000130618	0.153054	0.121689	0.138451
14	97333	14	97333	0.000780844	1.37832e-05	2.90645e-07	1	0	0
15	85306	10	152193	0.000127883	8.55028e-06	5.82049e-05	0.185756	0.0612619	0.0193491
15	85306	11	151749	0.000121272	1.01958e-05	0.000143078	0.151057	0.079956	0.0659322
15	85306	12	139684	0.000124044	7.98719e-06	5.01747e-05	0.190875	0.0690922	0.025357
15	85306	13	113389	0.000117337	9.18822e-06	0.000108333	0.160386	0.0961945	0.08539
15	85306	14	97333	0.000134103	9.59203e-06	7.59162e-05	0.176836	0.0527033	0.014214
15	85306	15	85306	0.000758024	1.33198e-05	2.85425e-07	1	0	0
16	91977	10	152193	0.000112914	7.36097e-06	5.2683e-05	0.18636	0.125962	0.106551
16	91977	11	151749	0.000105495	8.78079e-06	0.000137572	0.14931	0.378393	0.35664
16	91977	12	139684	0.0001055	6.87593e-06	5.26302e-05	0.184459	0.365513	0.320166
16	91977	13	113389	0.000119699	7.91764e-06	5.57928e-05	0.185908	0.08318	0.0445571
16	91977	14	97333	0.00011496	8.25629e-06	7.71419e-05	0.172247	0.109909	0.0960693
16	91977	15	85306	9.93134e-05	8.11437e-06	0.000127945	0.151204	0.45156	0.377281
16	91977	16	91977	0.000588921	9.88623e-06	2.37794e-07	1	0	0
17	79447	10	152193	0.000122012	8.92359e-06	8.28585e-05	0.17069	0.0761093	0.0441791
17	79447	11	151749	0.000106554	1.06417e-05	0.000279607	0.127828	0.300676	0.346306
17	79447	12	139684	0.000125889	8.33998e-06	5.61343e-05	0.186566	0.0650507	0.0227799
17	79447	13	113389	0.000128204	9.59808e-06	9.08225e-05	0.168775	0.0617481	0.0261331
17	79447	14	97333	0.000130116	1.00117e-05	0.000101129	0.165248	0.0587624	0.0241061
17	79447	15	85306	0.000128313	9.84119e-06	9.98582e-05	0.165586	0.0618644	0.027712
17	79447	16	91977	0.000112937	8.47361e-06	9.16069e-05	0.165601	0.128597	0.133643
17	79447	17	79447	0.000817165	1.45207e-05	2.98481e-07	1	0	0
18	87102	10	152193	0.000111321	8.23804e-06	8.67801e-05	0.166902	0.147938	0.161163
18	87102	11	151749	0.000118484	9.83065e-06	0.000135874	0.152334	0.0909367	0.0846062
18	87102	12	139684	0.000120041	7.70008e-06	4.94261e-05	0.190659	0.0813726	0.0395575
18	87102	13	113389	0.000120868	8.86146e-06	8.36542e-05	0.170529	0.0801054	0.0501711
18	87102	14	97333	0.000120591	9.24243e-06	9.95824e-05	0.164136	0.0816293	0.0573509
18	87102	15	85306	0.000106515	9.08219e-06	0.000151177	0.147314	0.298348	0.323678
18	87102	16	91977	0.000117513	7.82746e-06	5.73479e-05	0.184671	0.0932474	0.0593712
18	87102	17	79447	0.000126473	9.48902e-06	9.16e-05	0.168463	0.0652668	0.0306267
18	87102	18	87102	0.000711977	1.23849e-05	2.74124e-07	1	0	0
19	72785	10	152193	0.000126474	9.75524e-06	0.000102102	0.163456	0.0651069	0.0330084
19	72785	11	151749	9.06244e-05	1.16329e-05	0.00073221	0.100437	0.102405	0.191115
19	72785	12	139684	0.000108124	9.10877e-06	0.000144209	0.148035	0.221241	0.270031
19	72785	13	113389	0.00012825	1.04899e-05	0.000128485	0.155976	0.0622813	0.0332274
19	72785	14	97333	0.000127267	1.09404e-05	0.00015606	0.149319	0.0646249	0.0409912
19	72785	15	85306	0.000127498	1.07553e-05	0.000144966	0.152003	0.0640816	0.0383263
19	72785	16	91977	0.000122079	9.26499e-06	9.58176e-05	0.165373	0.0763131	0.0480647
19	72785	17	79447	0.000144657	1.12398e-05	0.000105079	0.166097	0.0436012	0.00947454
19	72785	18	87102	0.00011453	1.03665e-05	0.000190813	0.140936	0.11683	0.147078
19	72785	19	72785	0.000956449	1.73488e-05	3.24043e-07	1	0	0
1	225945	10	152193	0.000120704	5.63515e-06	1.40465e-05	0.244926	0.0736587	0.0146189
1	225945	11	151749	0.000106336	6.71617e-06	4.64973e-05	0.18503	0.288603	0.278166
1	225945	12	139684	0.000106945	5.25939e-06	1.72686e-05	0.229886	0.245963	0.201444
1	225945	13	113389	0.000111591	6.05426e-06	2.54903e-05	0.213079	0.134829	0.0945881
1	225945	14	97333	0.000116864	6.31683e-06	2.51182e-05	0.215274	0.0915199	0.039163
1	225945	15	85306	0.000122163	6.21294e-06	1.97286e-05	0.228666	0.0703368	0.0156728
1	225945	16	91977	0.000106951	5.34725e-06	1.84371e-05	0.227469	0.247103	0.204691
1	225945	17	79447	0.000132879	6.49506e-06	1.68553e-05	0.239547	0.0500827	0.00437802
1	225945	18	87102	0.000118395	5.98904e-06	1.9313e-05	0.228743	0.083523	0.0259881
1	225945	19	72785	0.000118562	7.08689e-06	3.74017e-05	0.197457	0.0845062	0.039837
1	225945	1	225945	0.00038686	5.78341e-06	1.49622e-07	1	0	0
20	68842	10	152193	0.000130919	9.86407e-06	9.31278e-05	0.16761	0.0570794	0.02127
20	68842	11	151749	0.000111666	1.17596e-05	0.000343213	0.122594	0.149592	0.229255
20	68842	12	139684	0.000110196	9.20853e-06	0.00013972	0.149454	0.168492	0.212594
20	68842	13	113389	0.000154377	1.06242e-05	6.5222e-05	0.185986	0.0374639	0.00384098
20	68842	14	97333	0.00013453	1.10636e-05	0.000131249	0.156358	0.053085	0.0210804
20	68842	15	85306	0.000150774	1.08889e-05	7.88488e-05	0.178064	0.0395307	0.00539294
20	68842	16	91977	0.000118223	9.3645e-06	0.00011332	0.158644	0.0916641	0.0792754
20	68842	17	79447	0.000161006	1.13772e-05	7.23732e-05	0.183131	0.0350345	0.00319803
20	68842	18	87102	0.00011219	1.04791e-05	0.000215651	0.136759	0.141019	0.193534
20	68842	19	72785	0.000156425	1.2426e-05	0.000114594	0.16437	0.0373258	0.00582899
20	68842	1	225945	0.000124214	7.16732e-06	3.25304e-05	0.204927	0.066014	0.0180354
20	68842	20	68842	0.000975206	1.77297e-05	3.27027e-07	1	0	0
21	44962	10	152193	0.000136307	1.07966e-05	0.000113302	0.161222	0.0506236	0.0166919
21	44962	11	151749	9.74373e-05	1.28685e-05	0.000815551	0.0988286	0.276879	0.369586
21	44962	12	139684	0.000106211	1.00768e-05	0.000229154	0.133081	0.320797	0.34977
21	44962	13	113389	0.000123068	1.16016e-05	0.000223517	0.136978	0.0754628	0.07184
21	44962	14	97333	0.00012591	1.21017e-05	0.000240983	0.135197	0.0684331	0.0597
21	44962	15	85306	0.000101644	1.18918e-05	0.000514219	0.110902	3.4173	0.487833
21	44962	16	91977	0.000114931	1.02467e-05	0.000179906	0.142484	0.113121	0.138154
21	44962	17	79447	0.000112868	1.24172e-05	0.000406149	0.118604	0.13586	0.215972
21	44962	18	87102	9.86993e-05	1.14669e-05	0.000500667	0.111154	0.382622	0.392934
21	44962	19	72785	0.000126473	1.35762e-05	0.000369486	0.122778	0.0681273	0.0729335
21	44962	1	225945	0.000128497	7.84512e-06	4.06662e-05	0.195853	0.0578496	0.0138217
21	44962	20	68842	0.00012662	1.37243e-05	0.000383542	0.121765	0.0678956	0.0736811
21	44962	21	44962	0.00114778	2.12337e-05	3.50594e-07	1	0	0
22	40361	10	152193	0.000107498	1.07359e-05	0.000279596	0.127839	0.250978	0.318655
22	40361	11	151749	0.000109533	1.28095e-05	0.000513427	0.111701	0.190694	0.294746
22	40361	12	139684	0.000102198	1.00302e-05	0.000261344	0.12875	7.71132	0.493739
22	40361	13	113389	0.000105547	1.15443e-05	0.000397139	0.118116	0.387728	0.387917
22	40361	14	97333	0.00011645	1.20429e-05	0.000319991	0.12572	0.104951	0.148542
22	40361	15	85306	7.78418e-05	1.18421e-05	0.00138604	0.0853937	0.0417525	0.0551427
22	40361	16	91977	0.000102607	1.01978e-05	0.000274394	0.127898	2.26312	0.478821
22	40361	17	79447	9.45257e-05	1.23595e-05	0.000785204	0.0998701	0.164459	0.28823
22	40361	18	87102	0.000121819	1.14175e-05	0.000218539	0.137938	0.0795113	0.0788954
22	40361	19	72785	0.000118847	1.35113e-05	0.000460711	0.116003	0.0931574	0.140506
22	40361	1	225945	0.000113718	7.80161e-06	6.44219e-05	0.17427	0.116245	0.104103
22	40361	20	68842	0.000106483	1.36567e-05	0.000729799	0.102958	0.315775	0.380366
22	40361	21	44962	0.000100473	1.49453e-05	0.00127481	0.0897508	0.861382	0.461015
22	40361	22	40361	0.00113816	2.10384e-05	3.4944e-07	1	0	0
2	241232	10	152193	0.000117669	5.48277e-06	1.39383e-05	0.243512	0.0851566	0.0229746
2	241232	11	151749	0.000110676	6.53738e-06	3.56854e-05	0.196408	0.148438	0.128173
2	241232	12	139684	0.000105631	5.11848e-06	1.62837e-05	0.231573	0.329156	0.260258
2	241232	13	113389	0.00011048	5.89201e-06	2.38152e-05	0.21515	0.149934	0.11231
2	241232	14	97333	0.000133889	6.16133e-06	1.32656e-05	0.251538	0.0482429	0.00322698
2	241232	15	85306	0.000116794	6.04388e-06	2.11347e-05	0.222959	0.0911088	0.03533
2	241232	16	91977	9.93396e-05	5.20387e-06	2.21837e-05	0.215478	0.416684	0.316174
2	241232	17	79447	0.000125496	6.31556e-06	1.89212e-05	0.230733	0.0618339	0.0101352
2	241232	18	87102	0.000123361	5.83236e-06	1.47689e-05	0.243073	0.0661889	0.0106729
2	241232	19	72785	0.0001162	6.89641e-06	3.6363e-05	0.19737	0.0959352	0.0543912
2	241232	1	225945	0.000116879	3.98578e-06	4.02599e-06	0.31169	0.0833082	0.0100483
2	241232	20	68842	0.000132228	6.98214e-06	2.28953e-05	0.222484	0.0511429	0.00607744
2	241232	21	44962	0.000112885	7.62785e-06	6.06855e-05	0.175476	0.123239	0.113793
2	241232	22	40361	0.000112828	7.5927e-06	5.971e-05	0.176341	0.123928	0.11392
2	241232	2	241232	0.000371822	5.47808e-06	1.41145e-07	1	0	0
3	212651	10	152193	0.00012807	6.38767e-06	1.82611e-05	0.236213	0.0576454	0.00744063
3	212651	11	151749	0.000115146	7.61061e-06	5.56231e-05	0.182119	0.105579	0.0798104
3	212651	12	139684	0.000118492	5.9624e-06	1.89126e-05	0.231519	0.0836571	0.0252308
3	212651	13	113389	0.000117716	6.86068e-06	3.38438e-05	0.20431	0.0892194	0.0419297
3	212651	14	97333	0.000139218	7.17203e-06	2.07619e-05	0.233104	0.0445824	0.00319485
3	212651	15	85306	0.000130646	7.04288e-06	2.48526e-05	0.22228	0.0544283	0.00752508
3	212651	16	91977	0.000107964	6.05785e-06	2.9122e-05	0.208717	0.213029	0.191339
3	212651	17	79447	0.000126298	7.34925e-06	3.36328e-05	0.206954	0.0624624	0.014782
3	212651	18	87102	0.000118124	6.78357e-06	3.1924e-05	0.207441	0.0872875	0.0381383
3	212651	19	72785	0.000132574	8.03606e-06	3.9527e-05	0.200692	0.052566	0.00940595
3	212651	1	225945	0.000127212	4.64698e-06	5.29462e-06	0.302353	0.0552872	0.00271935
3	212651	20	68842	0.000142499	8.13246e-06	3.11455e-05	0.213689	0.0426132	0.00370673
3	212651	21	44962	0.000129592	8.88595e-06	6.42883e-05	0.179539	0.0577114	0.017919
3	212651	22	40361	0.00013906	8.85221e-06	4.79598e-05	0.193704	0.0460555	0.0068156
3	212651	2	241232	0.000123861	4.51982e-06	5.27262e-06	0.300237	0.0617126	0.0041245
3	212651	3	212651	0.000467584	7.42251e-06	1.90176e-07	1	0	0
4	222219	10	152193	0.000131516	6.53342e-06	1.79744e-05	0.238288	0.0524662	0.0052416
4	222219	11	151749	0.000111137	7.77997e-06	6.97507e-05	0.172675	0.147466	0.153308
4	222219	12	139684	0.00011117	6.09271e-06	2.65319e-05	0.213379	0.142147	0.103863
4	222219	13	113389	0.000117096	7.01406e-06	3.77145e-05	0.199649	0.0928152	0.0489339
4	222219	14	97333	0.000127354	7.32153e-06	3.20607e-05	0.209476	0.0603402	0.0127733
4	222219	15	85306	0.000130548	7.20018e-06	2.72053e-05	0.218194	0.054822	0.00820022
4	222219	16	91977	0.000117269	6.19693e-06	2.29639e-05	0.222706	0.0903935	0.0347059
4	222219	17	79447	0.000149079	7.53591e-06	1.92592e-05	0.239972	0.0379723	0.00160368
4	222219	18	87102	0.000116832	6.9349e-06	3.63827e-05	0.201553	0.0942967	0.0496868
4	222219	19	72785	0.000134025	8.21685e-06	4.13426e-05	0.199308	0.0509465	0.00868145
4	222219	1	225945	0.000119637	4.74351e-06	7.33706e-06	0.27933	0.0749355	0.0101696
4	222219	20	68842	0.000159459	8.33444e-06	2.19871e-05	0.234902	0.0335884	0.00109986
4	222219	21	44962	0.000126023	9.08271e-06	7.82165e-05	0.171513	0.0647894	0.0285733
4	222219	22	40361	0.00012269	9.03922e-06	8.52804e-05	0.167886	0.0733355	0.0419614
4	222219	2	241232	0.000116888	4.61497e-06	7.21457e-06	0.278336	0.0861749	0.0159893
4	222219	3	212651	0.000132611	5.38412e-06	8.06322e-06	0.281433	0.0490548	0.00228631
4	222219	4	222219	0.000484161	7.75909e-06	1.97544e-07	1	0	0
5	193605	10	152193	0.000103962	6.63347e-06	4.84041e-05	0.185904	0.638273	0.392666
5	193605	11	151749	0.000111834	7.91581e-06	7.28502e-05	0.17149	0.138395	0.141518
5	193605	12	139684	9.48843e-05	6.1984e-06	5.31136e-05	0.179741	0.155839	0.156492
5	193605	13	113389	0.000110974	7.13417e-06	4.9858e-05	0.186739	0.148883	0.139021
5	193605	14	97333	0.000116455	7.44292e-06	4.87225e-05	0.189047	0.0974336	0.0621694
5	193605	15	85306	0.000116435	7.31683e-06	4.55756e-05	0.192064	0.0974423	0.0600126
5	193605	16	91977	0.000103132	6.30111e-06	4.07833e-05	0.193299	1.10551	0.434845
5	193605	17	79447	0.00011741	7.63969e-06	5.22927e-05	0.186526	0.0925384	0.05703
5	193605	18	87102	0.000111702	7.05391e-06	4.6466e-05	0.190186	0.138627	0.120999
5	193605	19	72785	0.000112022	8.34833e-06	8.92067e-05	0.164411	0.137313	0.148638
5	193605	1	225945	0.00010734	4.82e-06	1.20349e-05	0.247346	0.224444	0.166147
5	193605	20	68842	0.000110949	8.43919e-06	9.6665e-05	0.161306	0.15259	0.175036
5	193605	21	44962	0.000121523	9.23873e-06	9.64695e-05	0.163228	0.0772585	0.0510868
5	193605	22	40361	0.000109404	9.19255e-06	0.000142745	0.14775	0.184159	0.23367
5	193605	2	241232	0.000110471	4.69201e-06	9.6464e-06	0.259618	0.144179	0.0730629
5	193605	3	212651	0.000102851	5.4598e-06	2.33816e-05	0.215424	1.43285	0.443884
5	193605	4	222219	0.000109702	5.58329e-06	1.97859e-05	0.22572	0.164172	0.120575
5	193605	5	193605	0.000497608	8.03213e-06	2.03302e-07	1	0	0
6	206160	10	152193	9.4147e-05	8.66655e-06	0.000203768	0.134433	0.147749	0.207179
6	206160	11	151749	0.000113557	1.03408e-05	0.000195368	0.139047	0.124698	0.163646
6	206160	12	139684	0.000132835	8.10847e-06	4.06365e-05	0.200933	0.052654	0.00942055
6	206160	13	113389	0.000130963	9.32774e-06	7.46602e-05	0.175973	0.0565647	0.0179184
6	206160	14	97333	0.000106971	9.71984e-06	0.000193713	0.138665	0.272773	0.31898
6	206160	15	85306	0.000127762	9.56195e-06	9.07098e-05	0.168287	0.0623958	0.027129
6	206160	16	91977	0.000107176	8.232e-06	0.000100429	0.160407	0.256574	0.282873
6	206160	17	79447	0.000120151	9.97962e-06	0.000136444	0.152422	0.083859	0.0716379
6	206160	18	87102	0.000131419	9.22302e-06	7.04465e-05	0.178673	0.0558976	0.0165063
6	206160	19	72785	0.00012047	1.09078e-05	0.000191066	0.141187	0.0834459	0.0829563
6	206160	1	225945	0.000105964	6.29625e-06	3.65318e-05	0.194978	0.312088	0.283001
6	206160	20	68842	0.000123175	1.10278e-05	0.000182861	0.143001	0.0744955	0.0636658
6	206160	21	44962	0.000125527	1.20685e-05	0.000241264	0.134636	0.069072	0.0615343
6	206160	22	40361	0.000112572	1.20092e-05	0.000360746	0.121398	0.138264	0.214756
6	206160	2	241232	0.000113045	6.12959e-06	2.54316e-05	0.212142	0.117936	0.0732228
6	206160	3	212651	0.000116354	7.13557e-06	4.13902e-05	0.194605	0.0968244	0.0574077
6	206160	4	222219	0.000110584	7.29356e-06	5.51586e-05	0.181691	0.154852	0.152883
6	206160	5	193605	0.000111576	7.42099e-06	5.70148e-05	0.180925	0.140586	0.13377
6	206160	6	206160	0.000777143	1.3708e-05	2.89814e-07	1	0	0
7	177367	10	152193	0.00012703	6.90564e-06	2.56924e-05	0.220218	0.0605839	0.0110318
7	177367	11	151749	0.000108829	8.22881e-06	9.44299e-05	0.161787	0.195769	0.227506
7	177367	12	139684	0.000125411	6.45191e-06	2.06497e-05	0.230315	0.0632984	0.0109964
7	177367	13	113389	0.000110681	7.41675e-06	5.87208e-05	0.180559	0.154739	0.154043
7	177367	14	97333	0.000124275	7.7415e-06	4.40288e-05	0.195583	0.0678927	0.0224893
7	177367	15	85306	0.000125704	7.61137e-06	3.93584e-05	0.201022	0.0644383	0.01777
7	177367	16	91977	0.000103129	6.55084e-06	4.75551e-05	0.187392	1.11766	0.437492
7	177367	17	79447	0.000125188	7.94611e-06	4.74142e-05	0.192811	0.0659848	0.0215774
7	177367	18	87102	0.000128104	7.34161e-06	3.16654e-05	0.211452	0.0593067	0.011736
7	177367	19	72785	0.000122924	8.6831e-06	7.22714e-05	0.174904	0.0725584	0.0367566
7	177367	1	225945	0.000111508	5.01225e-06	1.20836e-05	0.249106	0.13159	0.0656444
7	177367	20	68842	0.000116108	8.77498e-06	9.42539e-05	0.163653	0.101929	0.0918219
7	177367	21	44962	9.61159e-05	9.60085e-06	0.000279789	0.12516	0.203144	0.285575
7	177367	22	40361	0.00011559	9.55822e-06	0.000134092	0.151338	0.106611	0.114378
7	177367	2	241232	0.000117027	4.88109e-06	8.97484e-06	0.266629	0.0865292	0.0184412
7	177367	3	212651	0.00011411	5.67882e-06	1.81016e-05	0.23171	0.108775	0.0500944
7	177367	4	222219	0.000127445	5.8149e-06	1.28233e-05	0.254219	0.0578226	0.00586136
7	177367	5	193605	0.000109912	5.90575e-06	2.45321e-05	0.216381	0.162055	0.12636
7	177367	6	206160	0.000118779	7.71754e-06	5.19941e-05	0.186725	0.0859157	0.0477257
7	177367	7	177367	0.000529584	8.68141e-06	2.16254e-07	1	0	0
8	163436	10	152193	0.000128029	6.72123e-06	2.2374e-05	0.227025	0.0584191	0.00887422
8	163436	11	151749	0.000110453	8.00787e-06	8.00607e-05	0.167955	0.159639	0.176058
8	163436	12	139684	0.000118835	6.27454e-06	2.28902e-05	0.223229	0.0831669	0.0274968
8	163436	13	113389	0.000123053	7.2226e-06	3.48034e-05	0.205333	0.0703609	0.021659
8	163436	14	97333	0.000128963	7.53683e-06	3.42126e-05	0.207603	0.0578652	0.0115045
8	163436	15	85306	0.00013712	7.41643e-06	2.51812e-05	0.224293	0.0470773	0.00443838
8	163436	16	91977	0.000110951	6.37594e-06	3.20095e-05	0.206215	0.147308	0.117066
8	163436	17	79447	0.000123962	7.73207e-06	4.4255e-05	0.195289	0.0686773	0.0233491
8	163436	18	87102	0.00012486	7.14241e-06	3.14331e-05	0.210812	0.0657445	0.0163484
8	163436	19	72785	0.000126126	8.45163e-06	5.87188e-05	0.183564	0.0642243	0.0230072
8	163436	1	225945	0.000111164	4.87742e-06	1.09769e-05	0.254015	0.135505	0.067059
8	163436	20	68842	0.000144524	8.55851e-06	3.60467e-05	0.208364	0.0416453	0.00373644
8	163436	21	44962	0.000115185	9.34421e-06	0.000124422	0.153421	0.108917	0.115865
8	163436	22	40361	0.000117379	9.30186e-06	0.000113518	0.157195	0.0951838	0.0869913
8	163436	2	241232	0.000122617	4.75441e-06	6.71374e-06	0.285754	0.065611	0.00605346
8	163436	3	212651	0.000137681	5.5472e-06	7.8205e-06	0.285965	0.0439256	0.00143661
8	163436	4	222219	0.000127336	5.65905e-06	1.15502e-05	0.259812	0.0577409	0.00541284
8	163436	5	193605	0.000100052	5.74595e-06	3.19287e-05	0.201475	0.585058	0.373956
8	163436	6	206160	0.000100886	7.50637e-06	8.86459e-05	0.162224	1.06397	0.443099
8	163436	7	177367	0.000129162	5.98629e-06	1.36465e-05	0.252153	0.0552813	0.0051644
8	163436	8	163436	0.000506898	8.22077e-06	2.0717e-07	1	0	0
9	129411	10	152193	0.000120618	7.38181e-06	4.1054e-05	0.198138	0.0785332	0.0325747
9	129411	11	151749	0.000109822	8.80244e-06	0.000118685	0.154703	0.174722	0.212974
9	129411	12	139684	0.000103655	6.8923e-06	5.69529e-05	0.18038	0.765051	0.412594
9	129411	13	113389	0.000121776	7.93765e-06	5.26557e-05	0.188242	0.0755292	0.033659
9	129411	14	97333	0.000121442	8.27872e-06	6.28293e-05	0.181103	0.077106	0.0393112
9	129411	15	85306	0.000128508	8.14264e-06	4.70896e-05	0.194731	0.0596894	0.0155051
9	129411	16	91977	0.000134712	7.0231e-06	2.17661e-05	0.231946	0.0495093	0.00470669
9	129411	17	79447	0.000125529	8.4992e-06	6.11651e-05	0.183198	0.0661049	0.0251313
9	129411	18	87102	0.000112012	7.84441e-06	6.98621e-05	0.175195	0.137621	0.135981
9	129411	19	72785	0.000131063	9.29211e-06	7.33244e-05	0.176706	0.056386	0.0175272
9	129411	1	225945	0.000122159	5.36741e-06	1.10385e-05	0.258589	0.0686546	0.00983171
9	129411	20	68842	0.000109721	9.38475e-06	0.000153026	0.146542	0.178791	0.229228
9	129411	21	44962	0.00012687	1.02758e-05	0.000123651	0.156545	0.0646444	0.0363176
9	129411	22	40361	0.000116439	1.02244e-05	0.000169544	0.144456	0.102445	0.115664
9	129411	2	241232	0.000120919	5.22327e-06	1.03164e-05	0.261051	0.0718961	0.0110706
9	129411	3	212651	0.000121957	6.07854e-06	1.82108e-05	0.234658	0.0713429	0.0151196
9	129411	4	222219	0.000116316	6.21133e-06	2.39379e-05	0.219855	0.0954346	0.0412999
9	129411	5	193605	0.000118536	6.32067e-06	2.38004e-05	0.221124	0.0844988	0.0294957
9	129411	6	206160	0.000122295	8.25657e-06	6.0479e-05	0.182172	0.0740861	0.0348862
9	129411	7	177367	0.00011766	6.57038e-06	2.85752e-05	0.21279	0.0892942	0.0378702
9	129411	8	163436	0.000129854	6.40244e-06	1.7445e-05	0.240213	0.0549511	0.00597751
9	129411	9	129411	0.000591262	9.93377e-06	2.38583e-07	1	0	0

[truncated: 17 more sheets: FIN, GBR, GIH, GWD, IBS, ITU, JPT, KHV, LWK, MSL, MXL, PEL, PJL, PUR, STU, TSI, YRI]
